# Supplementary material for: Association Between Baseline, Achieved, and Reduction of CRP and Cardiovascular Outcomes After LDL Cholesterol Lowering with Statins or Ezetimibe: A Systematic Review and Meta‐Analysis
Source: PubMed Central journal article supplement — J Am Heart Assoc. 2019 Aug 14;8(16):e012428. doi: 10.1161/JAHA.119.012428 (PMC6759897; doi:10.1161/jaha.119.012428), 2019-08-14
Supplement: JAH3-8-e012428-s001.pdf [file JAH3-8-e012428-s001.pdf]

# **Supplemental Material**

## Data S1.

### Supplemental Methods

We conducted the meta-analysis in accordance with the Preferred Reporting Items for Systematic Reviews and Meta-Analyses (PRISMA) guideline.

#### Data Sources and Searches

We searched PubMed, EMBASE, and the Cochrane Library from their inception through July 2, 2018. The following search terms was used: (Statin OR "Hydroxymethylglutaryl-CoA Reductase Inhibitor" OR "Pravastatin" OR "Lovastatin" OR "Simvastatin" OR "Rosuvastatin" OR "Atorvastatin" OR "Pitavastatin" OR "Mevastatin" OR "Fluvastatin" OR ezetimibe OR "LDL-C lowering") AND Random\* AND Trial. One reviewer (X.L.Z.) identified potential relevant citations from reference lists of the identified reports and relevant reviews.

#### Study Selection

Two reviewers (X.L.Z. and R.F.L.) independently evaluated the eligibility of studies. Discrepancies were resolved by discussion (W.X.). The main inclusion criteria were: (1) randomized controlled, cardiovascular outcome trials involving human subjects; (2) evaluated any comparison of the following strategies: statins, ezetimibe, or placebo (therapy to lower LDL-C vs. no therapy or more-intensive vs. less-intensive intervention); (3) included >500 patients and >40 clinical events and reported cardiovascular or mortality outcomes with at least 6 months of follow-up. We excluded trials investigating LDL-C lowering drugs other than statins and ezetimibe. Trials with proprotein convertase subtilisin/kexin type 9 (PCSK9) monoclonal antibodies were not included because PCSK9 antibodies do not have an effect on CRP. We did not impose limitations on language, sex, or age.

#### Outcome Measures

The outcomes of interest were all-cause and cardiovascular mortality, myocardial infarction, stroke, coronary revascularization, and major adverse cardiovascular events (MACEs).

#### Data Extraction and Assessment of Study Quality

Three investigators (X.L.Z., R.F.L. and W.X.) independently extracted data using a prespecified form which included trial name, year of publication, number of patients, duration of follow-up, intervention and comparison treatments, baseline, achieved and the magnitude of reduction in CRP and LDL-C concentrations in each treatment group, and absolute event rates of mortality and cardiovascular outcomes in both treatment groups. Median CRP and mean LDL-C values were abstracted from each trial. Consensus was achieved through referral to a third investigator (L.W.) in case of disagreement. Two reviewers (X.L.Z and W.X.) independently assessed risk of bias of each trial by using the Cochrane Collaboration's tool.

#### Data Synthesis and Statistical Analysis

To investigate the association between baseline CRP concentrations and risks of mortality and cardiovascular outcomes with more-intensive LDL-C lowering, random-effects meta-regression analysis was performed, with log-transformed baseline CRP concentration as the covariate for the main model. Additional co-variates including age, absolute magnitude of reduction in CRP concentrations (difference between achieved CRP concentrations in the more intensive and less intensive study arms), baseline LDL-C and absolute magnitude of reduction in LDL-C concentrations were added in the adjusted analyses. Baseline CRP concentrations were log-transformed because their distributions were markedly skewed. The association between achieved and magnitude of reduction in CRP concentrations and risks of outcomes was also assessed by meta-regression analysis. Because

statins and ezetimibe differ in their effects on CRP concentrations, we performed sensitivity analyses in statin trials. We also performed sensitivity analyses according to study population (primary or secondary prevention trials). To account for the variability in the length of follow-up for each of these trials, we used rate ratios (RRs) with their corresponding 95% CIs adjusted for patient-years as the statistic estimate.

Prespecified subgroup analyses were performed for all outcomes of interest on a trial level by (1) baseline CRP concentrations (using the median value across trials as cut-point); (2) magnitude of reduction in CRP concentrations (using the median value across trials as cut-point); (3) type of intervention in the more intensive treatment (statin, statin with ezetimibe); and (4) treatment in the less intensive group (active vs placebo). In addition, trials were stratified by achieved CRP concentrations. Sensitivity analyses excluding trials with heart failure or chronic kidney disease requiring hemodialysis, trials with less than 1000 patients, and trials published before year 2000 were performed to evaluate the robustness of our findings. To compare treatment associations in subgroups, a  $\chi^2$  test of interaction was performed.

Heterogeneity was assessed by the Cochran Q test and the I<sup>2</sup> statistic. A P value < 0.10 or an I<sup>2</sup> statistic > 50% indicates substantial heterogeneity. We examined potential publication bias by visually inspecting the asymmetry of the funnel plot and Begg's test. For the summary treatment effect estimate, a 2-tailed P value less than 0.05 was considered statistically significant. Analyses were conducted with the Stata software, version 12.0 (STATA Corporation) and Review Manager, version 5.3 (Cochrane Collaboration).

## PRISMA Checklist.

| Section/topic             | #  | Checklist item                                                                                                                                                                                                                                                                                              | Reported on page # |
|---------------------------|----|-------------------------------------------------------------------------------------------------------------------------------------------------------------------------------------------------------------------------------------------------------------------------------------------------------------|--------------------|
| <b>TITLE</b>              |    |                                                                                                                                                                                                                                                                                                             |                    |
| Title                     | 1  | Identify the report as a systematic review, meta-analysis, or both.                                                                                                                                                                                                                                         | 1                  |
| <b>ABSTRACT</b>           |    |                                                                                                                                                                                                                                                                                                             |                    |
| Structured summary        | 2  | Provide a structured summary including, as applicable: background; objectives; data sources; study eligibility criteria, participants, and interventions; study appraisal and synthesis methods; results; limitations; conclusions and implications of key findings; systematic review registration number. | 2,3                |
| <b>INTRODUCTION</b>       |    |                                                                                                                                                                                                                                                                                                             |                    |
| Rationale                 | 3  | Describe the rationale for the review in the context of what is already known.                                                                                                                                                                                                                              | 4                  |
| Objectives                | 4  | Provide an explicit statement of questions being addressed with reference to participants, interventions, comparisons, outcomes, and study design (PICOS).                                                                                                                                                  | 4                  |
| <b>METHODS</b>            |    |                                                                                                                                                                                                                                                                                                             |                    |
| Protocol and registration | 5  | Indicate if a review protocol exists, if and where it can be accessed (e.g., Web address), and, if available, provide registration information including registration number.                                                                                                                               | NA                 |
| Eligibility criteria      | 6  | Specify study characteristics (e.g., PICOS, length of follow-up) and report characteristics (e.g., years considered, language, publication status) used as criteria for eligibility, giving rationale.                                                                                                      | 5                  |
| Information sources       | 7  | Describe all information sources (e.g., databases with dates of coverage, contact with study authors to identify additional studies) in the search and date last searched.                                                                                                                                  | 5                  |
| Search                    | 8  | Present full electronic search strategy for at least one database, including any limits used, such that it could be repeated.                                                                                                                                                                               | 5                  |
| Study selection           | 9  | State the process for selecting studies (i.e., screening, eligibility, included in systematic review, and, if applicable, included in the meta-analysis).                                                                                                                                                   | 5                  |
| Data collection process   | 10 | Describe method of data extraction from reports (e.g., piloted forms, independently, in duplicate) and any processes for obtaining and confirming data from investigators.                                                                                                                                  | 6                  |

|                                    |    |                                                                                                                                                                                                                        |     |
|------------------------------------|----|------------------------------------------------------------------------------------------------------------------------------------------------------------------------------------------------------------------------|-----|
| Data items                         | 11 | List and define all variables for which data were sought (e.g., PICOS, funding sources) and any assumptions and simplifications made.                                                                                  | 6   |
| Risk of bias in individual studies | 12 | Describe methods used for assessing risk of bias of individual studies (including specification of whether this was done at the study or outcome level), and how this information is to be used in any data synthesis. | 6   |
| Summary measures                   | 13 | State the principal summary measures (e.g., risk ratio, difference in means).                                                                                                                                          | 7   |
| Synthesis of results               | 14 | Describe the methods of handling data and combining results of studies, if done, including measures of consistency (e.g., $I^2$ ) for each meta-analysis.                                                              | 6,7 |

| Section/topic                 | #  | Checklist item                                                                                                                                                                                           | Reported on page # |
|-------------------------------|----|----------------------------------------------------------------------------------------------------------------------------------------------------------------------------------------------------------|--------------------|
| Risk of bias across studies   | 15 | Specify any assessment of risk of bias that may affect the cumulative evidence (e.g., publication bias, selective reporting within studies).                                                             | 7                  |
| Additional analyses           | 16 | Describe methods of additional analyses (e.g., sensitivity or subgroup analyses, meta-regression), if done, indicating which were pre-specified.                                                         | 7                  |
| <b>RESULTS</b>                |    |                                                                                                                                                                                                          |                    |
| Study selection               | 17 | Give numbers of studies screened, assessed for eligibility, and included in the review, with reasons for exclusions at each stage, ideally with a flow diagram.                                          | 8                  |
| Study characteristics         | 18 | For each study, present characteristics for which data were extracted (e.g., study size, PICOS, follow-up period) and provide the citations.                                                             | 8                  |
| Risk of bias within studies   | 19 | Present data on risk of bias of each study and, if available, any outcome level assessment (see item 12).                                                                                                | 8                  |
| Results of individual studies | 20 | For all outcomes considered (benefits or harms), present, for each study: (a) simple summary data for each intervention group (b) effect estimates and confidence intervals, ideally with a forest plot. | 8-12               |
| Synthesis of results          | 21 | Present results of each meta-analysis done, including confidence intervals and measures of consistency.                                                                                                  | 8-12               |
| Risk of bias across studies   | 22 | Present results of any assessment of risk of bias across studies (see Item 15).                                                                                                                          | 8-12               |
| Additional analysis           | 23 | Give results of additional analyses, if done (e.g., sensitivity or subgroup analyses, meta-regression [see Item 16]).                                                                                    | 12,13              |
| <b>DISCUSSION</b>             |    |                                                                                                                                                                                                          |                    |

|                     |    |                                                                                                                                                                                      |    |
|---------------------|----|--------------------------------------------------------------------------------------------------------------------------------------------------------------------------------------|----|
| Summary of evidence | 24 | Summarize the main findings including the strength of evidence for each main outcome; consider their relevance to key groups (e.g., healthcare providers, users, and policy makers). | 13 |
| Limitations         | 25 | Discuss limitations at study and outcome level (e.g., risk of bias), and at review-level (e.g., incomplete retrieval of identified research, reporting bias).                        | 16 |
| Conclusions         | 26 | Provide a general interpretation of the results in the context of other evidence, and implications for future research.                                                              | 17 |
| <b>FUNDING</b>      |    |                                                                                                                                                                                      |    |
| Funding             | 27 | Describe sources of funding for the systematic review and other support (e.g., supply of data); role of funders for the systematic review.                                           | 3  |

*From:* Moher D, Liberati A, Tetzlaff J, Altman DG, The PRISMA Group (2009). Preferred Reporting Items for Systematic Reviews and Meta-Analyses: The PRISMA Statement. PLoS Med 6(6): e1000097. doi:10.1371/journal.pmed1000097

**Table S1. Study and Patient Baseline Characteristics.**

| Trial               | Year | Total No. of patients | Age, yrs | Men, % | CHD, % | Other vascular disease, % | DM, % | HBP, % | Smoker, % | BMI (kg/m <sup>2</sup> ) | Median FU, yrs | More intensive LDL-C lowering            |                 |                     | Less intensive LDL-C lowering |                      |                 | Magnitude of reduction in CRP (mg/L) | Magnitude of reduction in LDL-C (mg/dL) |                     |                        |
|---------------------|------|-----------------------|----------|--------|--------|---------------------------|-------|--------|-----------|--------------------------|----------------|------------------------------------------|-----------------|---------------------|-------------------------------|----------------------|-----------------|--------------------------------------|-----------------------------------------|---------------------|------------------------|
|                     |      |                       |          |        |        |                           |       |        |           |                          |                | Treatment                                | No. of patients | Baseline CRP (mg/L) | Baseline LDL-C (mg/dL)        | Treatment            | No. of patients |                                      |                                         | Baseline CRP (mg/L) | Baseline LDL-C (mg/dL) |
| 4D                  | 2005 | 1255                  | 65.7     | 54     | 50     | 53                        | 100   | NA     | 41        | 27.5                     | 11.5           | Atorvastatin (20 mg)                     | 636             | 5                   | 125                           | Placebo              | 619             | 5                                    | 127                                     | 1.6                 | 40                     |
| A to Z              | 2004 | 4497                  | 61       | 76     | 100    | 11                        | 24    | 50     | 41        | NA                       | 2              | Simvastatin (80 mg)                      | 2265            | 20.1                | 112                           | Simvastatin (20 mg)  | 2232            | 20.4                                 | 111                                     | 0.3                 | 15.7                   |
| AFCAPS-<br>_TEXCAPS | 1998 | 6605                  | 58       | 85     | <1     | <1                        | 15    | 22     | 12        | NA                       | 5.2            | Lovastatin (20-40 mg)                    | 3304            | 1.6                 | 150                           | Placebo              | 3301            | 1.5                                  | 153                                     | 0.3                 | 40.5                   |
| ALERT               | 2003 | 2102                  | 50       | 66     | 19     | 11                        | 19    | 75     | 18.5      | 25.8                     | 6.7            | Fluvastatin (40 mg)                      | 1050            | 1.62                | 159                           | Placebo              | 1052            | 1.6                                  | 159                                     | NA                  | 38.2                   |
| ASCOT-LA            | 2003 | 10305                 | 63.2     | 81     | <1     | 14                        | 25    | NA     | 32.7      | 28.7                     | 3.3            | Atorvastatin (10 mg)                     | 5168            | 2.72                | 133                           | Placebo              | 5137            | 2.7                                  | 133                                     | NA                  | 37.2                   |
| AURORA              | 2009 | 2773                  | 64.1     | 62     | 24     | 27                        | 26.4  | NA     | 15        | 25.4                     | 3.8            | Rosuvastatin (10 mg)                     | 1389            | 4.8                 | 100                           | Placebo              | 1384            | 5.2                                  | 99                                      | 1.6                 | 39                     |
| CARDS               | 2004 | 2841                  | 61.5     | 68     | <1     | 3                         | 18    | NA     | 46        | 28.7                     | 3.9            | Atorvastatin (10 mg)                     | 1429            | 12.6                | 117                           | Placebo              | 1412            | 14.5                                 | 117                                     | 5.3                 | 39.8                   |
| CARE                | 1996 | 4159                  | 59       | 86     | 100    | 0                         | 14    | 43     | 21        | 28                       | 5              | Pravastatin (40 mg)                      | 2081            | 3.8                 | 139                           | Placebo              | 2078            | 3.6                                  | 139                                     | 1.2                 | 40.3                   |
| CORONA              | 2007 | 5011                  | 73       | 76     | 73     | 13                        | 30    | 63     | 9         | 27                       | 2.7            | Rosuvastatin (10 mg)                     | 2514            | 3.1                 | 137                           | Placebo              | 2497            | 3                                    | 136                                     | 1.2                 | 34                     |
| HIJ-PRO<br>PER      | 2007 | 1721                  | 65.7     | 75.6   | 100    | 7                         | 30    | 68     | 59        | 24.3                     | 3.9            | Pitavastatin (1-4mg) + ezetimibe (10 mg) | 864             | 21.2                | 135                           | Pitavastatin (1-4mg) | 857             | 21                                   | 135                                     | NA                  | 20                     |

|                  |      |       |      |      |     |     |      |      |      |      |     |                                         |       |      |       |                      |       |      |     |      |      |
|------------------|------|-------|------|------|-----|-----|------|------|------|------|-----|-----------------------------------------|-------|------|-------|----------------------|-------|------|-----|------|------|
| HOPE-3           | 2016 | 12705 | 65.8 | 53.7 | 0   | 0   | 6    | 38   | 28   | 27.1 | 5.6 | Rosuvastatin (10 mg)                    | 6361  | 2    | 128   | Placebo              | 6344  | 2    | 128 | 1.2  | 28.2 |
| HPS              | 2002 | 20536 | 64   | 75   | 65  | 43  | 29   | NA   | NA   | NA   | 5   | Simvastatin (40 mg)                     | 10269 | 3.1  | 131.5 | Placebo              | 10267 | 3.1  | 131 | 1.38 | 26.3 |
| IMPROVE-IT       | 2015 | 18144 | 63.6 | 75.7 | 100 | 5.5 | 27   | 61.5 | 33   | 28.3 | 6   | Simvastatin (40 mg) + ezetimibe (10 mg) | 9067  | 9.6  | 94    | Simvastatin (40 mg)  | 9077  | 9.5  | 94  | 0.3  | 16   |
| JUPITER          | 2008 | 17802 | 66   | 62   | 0   | 0   | <1   | NA   | 16   | 28.3 | 1.9 | Rosuvastatin (20 mg)                    | 8901  | 4.2  | 108   | Placebo              | 8901  | 4.3  | 108 | 1.5  | 54   |
| LIPID            | 1998 | 9014  | 62   | 83   | 100 | 10  | 9    | 41   | 74   | NA   | 6.1 | Pravastatin (40 mg)                     | 4512  | 2.5  | 150   | Placebo              | 4502  | 2.4  | 150 | 0.4  | 39.8 |
| Liu, et al       | 2016 | 798   | 62   | 72   | 100 | 0   | 32.5 | 64.6 | 20.6 | NA   | 1   | Atorvastatin (40-80 mg)                 | 400   | 4.3  | 131   | Atorvastatin (20 mg) | 398   | 4.5  | 131 | NA   | NA   |
| PREVENT-IT       | 2004 | 864   | 52   | 65   | <1  | 1.5 | NA   | NA   | 74   | 26   | 3.8 | Pravastatin (40 mg)                     | 433   | 1.3  | 158   | Placebo              | 431   | 1.3  | 154 | 0.28 | 35   |
| PROSPER          | 2002 | 5804  | 75   | 48   | 32  | 18  | 11   | NA   | 27   | NA   | 3.2 | Pravastatin (40 mg)                     | 2891  | 3.1  | 147   | Placebo              | 2913  | 3.1  | 147 | NA   | 50   |
| PROVE-IT-TIMI 22 | 2004 | 4162  | 58   | 78   | 100 | 8   | 18   | 50   | 36.8 | NA   | 2   | Atorvastatin (80 mg)                    | 2099  | 12.3 | 106   | Pravastatin (40 mg)  | 2063  | 12.3 | 106 | 0.8  | 34   |
| REAL-CAD         | 2018 | 12413 | 68   | 83   | 100 | 14  | 40   | 75.7 | 16.4 | 24.6 | 3.9 | Pitavastatin (4mg)                      | 6199  | 0.57 | 88    | Pitavastatin (1mg)   | 6214  | 0.59 | 88  | 0.1  | 14   |
| SEAS             | 2008 | 1873  | 68   | 71   | 0   | 0   | 0    | 51.5 | 55   | 27   | 4.4 | Simvastatin (40 mg) + ezetimibe (10 mg) | 944   | 2.1  | 140   | Placebo              | 929   | 2.2  | 139 | 0.6  | 70   |
| SHARP            | 2011 | 9270  | 62   | 62   | 0   | 15  | 23   |      | 13   | 27   | 4.9 | Simvastatin (20 mg) + ezetimibe (10 mg) | 4650  | 3    | 107   | Placebo              | 4620  | 3    | 107 | 0.7  | 29   |



|          |      |       |    |     |     |    |    |    |    |      |     |                      |      |     |     |                      |      |     |     |    |      |
|----------|------|-------|----|-----|-----|----|----|----|----|------|-----|----------------------|------|-----|-----|----------------------|------|-----|-----|----|------|
| TNT      | 2005 | 10001 | 61 | 81  | 100 | 15 | 15 | 54 | 76 | 28.4 | 4.9 | Atorvastatin (80 mg) | 4995 | 1.7 | 97  | Atorvastatin (10 mg) | 5006 | 1.7 | 98  | NA | 23.3 |
| WOSCO PS | 1995 | 6595  | 55 | 100 | 5   | 3  | 1  | 16 | 78 |      | 4.9 | Pravastatin (40 mg)  | 3302 | 2   | 192 | Placebo              | 3293 | 2   | 192 | NA | 41.3 |

BMI, body mass index; CRP, C-reactive protein; CHD, coronary heart disease; DM, diabetes mellitus; FU, follow-up; HBP, high blood pressure; LDL-C, low-density lipoprotein cholesterol; NA, not available

4D, German Diabetes Dialysis Study—Die Deutsche Diabetes Dialyse Studies; A to Z, Aggrastat to Zocor; AFCAPS-TexCAPS, Air Force/Texas Coronary Atherosclerosis Prevention Study; ALERT, Assessment of LEscol in Renal Transplantation Study; ASCOT-LLA, Anglo-Scandinavian Cardiac Outcomes Trial—Lipid Lowering Arm; AURORA, An Assessment of Survival and Cardiovascular Events; CARDS, Collaborative Atorvastatin Diabetes Study; CARE, Cholesterol And Recurrent Events; CORON, the Controlled Rosuvastatin Multinational Trial in Heart Failure; HIJ-PROPER, the Heart Institute of Japan PROper level of lipid lOwering with Pitavastatin and Ezetimibe in acute coRONary syndrome trial; HOPE-3, Heart Outcomes Prevention Evaluation; HPS, Heart Protection Study; IMPROVE-IT, Improved Reduction of Outcomes: Vytarin Efficacy International Trial; JUPITER, Justification for the Use of Statins in Prevention: an Intervention Trial Evaluating Rosuvastatin study group; LIPID, Long-term Intervention with Pravastatin in Ischaemic Disease; PREVEND IT, the Prevention of RENal and Vascular ENdstage Disease Intervention Trial; PROSPER, PROspective Study of Pravastatin in the Elderly at Risk; PROVE IT-TIMI 22, Pravastatin or Atorvastatin Evaluation and Infection Therapy; REAL-CAD, Randomized Evaluation of Aggressive or Moderate Lipid Lowering Therapy With Pitavastatin in Coronary Artery Disease; SEAS, Simvastatin and Ezetimibe in Aortic Stenosis; SHARP, Study of Heart and Renal Protection; TNT, Treating to New Targets; WOSCOPS, West of Scotland Coronary Prevention Study.

**Table S2. Study Characteristics of the Included Randomized Trials.**

| <b>Trial</b>    | <b>Year</b> | <b>Selected composite endpoint (major adverse cardiovascular events)</b>                                                                 | <b>Reported primary endpoint in original trial</b>                                                                                       | <b>Definition of myocardial infarction</b>                                                                                                                                                                                                                                                                                                                                                                |
|-----------------|-------------|------------------------------------------------------------------------------------------------------------------------------------------|------------------------------------------------------------------------------------------------------------------------------------------|-----------------------------------------------------------------------------------------------------------------------------------------------------------------------------------------------------------------------------------------------------------------------------------------------------------------------------------------------------------------------------------------------------------|
| 4D              | 2005        | Cardiac death, nonfatal myocardial infarction, and stroke                                                                                | Cardiac death, nonfatal myocardial infarction, and stroke                                                                                | Two of the following three criteria were met: typical symptoms; elevated levels of cardiac enzymes (i.e., a level of creatine kinase MB above 5 percent of the total level of creatine kinase, a level of lactic dehydrogenase 1.5 times the upper limit of normal, or a level of troponin T greater than 2 ng per milliliter); or diagnostic changes on the electrocardiogram.                           |
| A to Z          | 2004        | Cardiovascular death, myocardial infarction, Stroke, or Hospitalization for acute coronary syndrome                                      | Cardiovascular death, myocardial infarction, Stroke, or Hospitalization for acute coronary syndrome                                      | NA                                                                                                                                                                                                                                                                                                                                                                                                        |
| AFCAPS_ TEXCAPS | 1998        | Myocardial infarction, unstable angina, or sudden cardiac death                                                                          | Myocardial infarction, unstable angina, or sudden cardiac death                                                                          | NA                                                                                                                                                                                                                                                                                                                                                                                                        |
| ALERT           | 2003        | Cardiac death, definite or probable non-fatal myocardial infarction, coronary-artery bypass grafting, percutaneous coronary intervention | Cardiac death, definite or probable non-fatal myocardial infarction, coronary-artery bypass grafting, percutaneous coronary intervention | An adjudicated MI was classified as definite if a new Q-wave developed in the presence of abnormal cardiac markers or symptoms, or pathological ST elevations and T-wave changes developed in the presence of abnormal cardiac markers plus symptoms. An MI was classified as probable if pathological ST elevations and T-wave changes developed in the presence of abnormal cardiac markers or symptoms |
| ASCOT-LL A      | 2003        | Total cardiovascular events and procedures                                                                                               | Cardiovascular death and non-fatal myocardial infarction                                                                                 | NA                                                                                                                                                                                                                                                                                                                                                                                                        |
| AURORA          | 2009        | Nonfatal myocardial infarction, nonfatal stroke, or death from cardiovascular causes                                                     | Nonfatal myocardial infarction, nonfatal stroke, or death from cardiovascular causes                                                     | NA                                                                                                                                                                                                                                                                                                                                                                                                        |
| CARDS           | 2004        | Cardiovascular death, myocardial infarction, stroke, unstable angina or revascularization                                                | Cardiovascular death, myocardial infarction, stroke, unstable angina or revascularization                                                | NA                                                                                                                                                                                                                                                                                                                                                                                                        |

|            |      |                                                                                                           |                                                                                                           |                                                                                                                                                                                                                                                                                                                                                                                                                                                                          |
|------------|------|-----------------------------------------------------------------------------------------------------------|-----------------------------------------------------------------------------------------------------------|--------------------------------------------------------------------------------------------------------------------------------------------------------------------------------------------------------------------------------------------------------------------------------------------------------------------------------------------------------------------------------------------------------------------------------------------------------------------------|
| CARE       | 1996 | Cardiovascular death or myocardial infarction                                                             | Cardiovascular death or myocardial infarction                                                             | NA                                                                                                                                                                                                                                                                                                                                                                                                                                                                       |
| CORONA     | 2007 | Cardiovascular death, nonfatal myocardial infarction, or nonfatal stroke                                  | Cardiovascular death, nonfatal myocardial infarction, or nonfatal stroke                                  | NA                                                                                                                                                                                                                                                                                                                                                                                                                                                                       |
| HIJ-PROPER | 2017 | All-cause death, non-fatal myocardial infarction, non-fatal stroke, unstable angina, or revascularization | All-cause death, non-fatal myocardial infarction, non-fatal stroke, unstable angina, or revascularization | NA                                                                                                                                                                                                                                                                                                                                                                                                                                                                       |
| HOPE-3     | 2016 | Cardiovascular death, nonfatal myocardial infarction, or nonfatal stroke                                  | Cardiovascular death, nonfatal myocardial infarction, or nonfatal stroke                                  | EITHER Cardiac Ischemic Symptoms lasting > 20 minutes, determined by the site investigator to be secondary to ischemia OR ECG or changes consistent with acute infarction or ischemia MI AND Elevated cardiac biomarkers (values according to each hospital's laboratory): A rise and/or fall in cardiac biomarker values (preferably troponin, CKMB, AST, LDH or myoglobin) with at least one value above the 99 <sup>th</sup> percentile of the upper reference limit. |
| HPS        | 2002 | Cardiovascular death, myocardial infarction, stroke, or revascularization                                 | Mortality and fatal or non-fatal vascular events                                                          | NA                                                                                                                                                                                                                                                                                                                                                                                                                                                                       |
| IMPROVE-IT | 2015 | Death from cardiovascular causes, major coronary event, or nonfatal stroke                                | Death from cardiovascular causes, major coronary event, or nonfatal stroke                                | The presence of either ECG evidence or cardiac marker evidence (post-CABG, both ECG and cardiac marker evidence were required, if the CK-MB was $\geq 5X$ ULN to $< 10X$ ULN).                                                                                                                                                                                                                                                                                           |
| JUPITER    | 2008 | Cardiovascular death, myocardial infarction, stroke, unstable angina, or revascularization                | Cardiovascular death, myocardial infarction, stroke, unstable angina, or revascularization                | NA                                                                                                                                                                                                                                                                                                                                                                                                                                                                       |
| LIPID      | 1998 | Cardiovascular death or nonfatal myocardial infarction                                                    | Cardiovascular death                                                                                      | The presence of at least two new pathologic Q waves on the electrocardiogram or two of the following three criteria: at least 15 minutes of ischemic chest pain, evolutionary ST-T wave changes (as previously defined), or elevation of the serum level of creatine kinase or its MB isoenzyme to at least twice the upper limit of normal                                                                                                                              |
| Liu, et al | 2016 | Cardiovascular death, spontaneous myocardial                                                              | Cardiovascular death, spontaneous myocardial                                                              | A rise in cardiac biomarkers (preferably troponin), with at least 1                                                                                                                                                                                                                                                                                                                                                                                                      |

|                     |      |                                                                                                                                    |                                                                                                                                    |                                                                                                                                                                                                                                                                                                                                                                                                                                                                                                                                                       |
|---------------------|------|------------------------------------------------------------------------------------------------------------------------------------|------------------------------------------------------------------------------------------------------------------------------------|-------------------------------------------------------------------------------------------------------------------------------------------------------------------------------------------------------------------------------------------------------------------------------------------------------------------------------------------------------------------------------------------------------------------------------------------------------------------------------------------------------------------------------------------------------|
|                     |      | infarction, and unplanned revascularization                                                                                        | infarction, and unplanned revascularization                                                                                        | value above the 99th percentile of the upper reference limit together with evidence of myocardial ischemia with at least 1 of the following: symptoms of ischemia, electrocardiogram changes indicative of new ischemia (new specific ST-T changes or new left-bundle branch block), development of pathological Q waves in the electrocardiogram, imaging evidence of new loss of viable myocardium, or new regional wall motion abnormality.                                                                                                        |
| PREVEND<br>-IT      | 2004 | Cardiovascular death and hospitalization for cardiovascular morbidity                                                              | Cardiovascular death and hospitalization for cardiovascular morbidity                                                              | At least 2 of 4 of the following, which should include either new Q waves or enzyme elevation: (1) presence or history of typical or atypical chest pain of at least 15 minutes' duration; (2) ECG detection of ST-segment changes of at least 0.1 mV and/or T-wave inversion in at least 2 of 12 leads; (3) ECG detection of new significant Q waves in at least 2 of 12 leads; and (4) elevation of measurements of total creatine kinase (CK) and/or its isoenzyme CK-MB in at least 2 samples drawn within 48 hours of development of chest pain. |
| PROSPER             | 2002 | Coronary heart disease death or non-fatal myocardial infarction or fatal or non-fatal stroke                                       | Coronary heart disease death or non-fatal myocardial infarction or fatal or non-fatal stroke                                       | NA                                                                                                                                                                                                                                                                                                                                                                                                                                                                                                                                                    |
| PROVE<br>IT-TIMI 22 | 2004 | Death from any cause, myocardial infarction, documented unstable angina requiring rehospitalization, revascularization, and stroke | Death from any cause, myocardial infarction, documented unstable angina requiring rehospitalization, revascularization, and stroke | The presence of symptoms suggestive of ischemia or infarction, with either electrocardiographic evidence (new Q waves in two or more leads) or cardiac-marker evidence of infarction, according to the standard TIMI and American College of Cardiology definition.                                                                                                                                                                                                                                                                                   |
| REAL-CAD            | 2018 | Cardiovascular death, nonfatal myocardial infarction, nonfatal ischemic stroke, or unstable angina requiring emergency             | Cardiovascular death, nonfatal myocardial infarction, nonfatal ischemic stroke, or unstable angina requiring emergency             | Spontaneous: troponin with at least one value above the 99 <sup>th</sup> percentile of the upper reference limit.<br>Periprocedural PCI: Troponin>3 times URL or CKMB>3 times URL                                                                                                                                                                                                                                                                                                                                                                     |

|         |      |                                                                                                                                                                                                                                             |                                                                                                                                                                                                                                             |    |
|---------|------|---------------------------------------------------------------------------------------------------------------------------------------------------------------------------------------------------------------------------------------------|---------------------------------------------------------------------------------------------------------------------------------------------------------------------------------------------------------------------------------------------|----|
|         |      | hospitalization.                                                                                                                                                                                                                            | hospitalization.                                                                                                                                                                                                                            |    |
| SEAS    | 2008 | Cardiovascular death, aortic-valve replacement, nonfatal myocardial infarction, hospitalization for unstable angina pectoris, heart failure, coronary-artery bypass grafting, percutaneous coronary intervention, and nonhemorrhagic stroke | Cardiovascular death, aortic-valve replacement, nonfatal myocardial infarction, hospitalization for unstable angina pectoris, heart failure, coronary-artery bypass grafting, percutaneous coronary intervention, and nonhemorrhagic stroke | NA |
| SHARP   | 2011 | Cardiovascular death, myocardial infarction, stroke, or coronary revascularization                                                                                                                                                          | Non-fatal myocardial infarction or coronary death, non-haemorrhagic stroke, or any arterial revascularisation procedure                                                                                                                     | NA |
| TNT     | 2005 | Cardiovascular death, nonfatal non-procedure-related myocardial infarction, or resuscitation after cardiac arrest                                                                                                                           | Cardiovascular death, nonfatal non-procedure-related myocardial infarction, or resuscitation after cardiac arrest                                                                                                                           | NA |
| WOSCOPS | 1995 | Cardiovascular death or nonfatal myocardial infarction                                                                                                                                                                                      | Cardiovascular death or nonfatal myocardial infarction                                                                                                                                                                                      | NA |

4D, German Diabetes Dialysis Study—Die Deutsche Diabetes Dialyse Studies; A to Z, Aggrastat to Zocor; AFCAPS-TexCAPS, Air Force/Texas Coronary Atherosclerosis Prevention Study; ALERT, Assessment of LEScol in Renal Transplantation Study; ASCOT-LLA, Anglo-Scandinavian Cardiac Outcomes Trial—Lipid Lowering Arm; AURORA, An Assessment of Survival and Cardiovascular Events; CARDS, Collaborative Atorvastatin Diabetes Study; CARE, Cholesterol And Recurrent Events; CORON, the Controlled Rosuvastatin Multinational Trial in Heart Failure; HIJ-PROPER, the Heart Institute of Japan PROper level of lipid LOwering with Pitavastatin and Ezetimibe in acute coRONary syndrome trial; HOPE-3, Heart Outcomes Prevention Evaluation; HPS, Heart Protection Study; IMPROVE-IT, Improved Reduction of Outcomes: Vytorin Efficacy International Trial; JUPITER, Justification for the Use of Statins in Prevention: an Intervention Trial Evaluating Rosuvastatin study group; LIPID, Long-term Intervention with Pravastatin in Ischaemic Disease; PREVEND IT, the Prevention of RENal and Vascular ENdstage Disease Intervention Trial; PROSPER, PROspective Study of Pravastatin in the Elderly at Risk; PROVE IT-TIMI 22, Pravastatin or Atorvastatin Evaluation and Infection Therapy; REAL-CAD, Randomized Evaluation of Aggressive or Moderate Lipid Lowering Therapy With Pitavastatin in Coronary Artery Disease; SEAS, Simvastatin and Ezetimibe in Aortic Stenosis; SHARP, Study of Heart and Renal Protection; TNT, Treating to New Targets; WOSCOPS, West of Scotland Coronary Prevention Study.

**Table S3. Inclusion and Exclusion criteria of Included Randomized Controlled Trials.**

| Trial              | Year | Inclusion criteria                                                                                                                                                                                                                                                                                                 | Exclusion criteria                                                                                                                                                                                                                                                                                                                                                                                                                                                                                                                                                                                                                                                                                                                                                                                                                             |
|--------------------|------|--------------------------------------------------------------------------------------------------------------------------------------------------------------------------------------------------------------------------------------------------------------------------------------------------------------------|------------------------------------------------------------------------------------------------------------------------------------------------------------------------------------------------------------------------------------------------------------------------------------------------------------------------------------------------------------------------------------------------------------------------------------------------------------------------------------------------------------------------------------------------------------------------------------------------------------------------------------------------------------------------------------------------------------------------------------------------------------------------------------------------------------------------------------------------|
| 4D                 | 2005 | Subjects with type 2 diabetes mellitus 18 to 80 years of age who had been receiving maintenance hemodialysis for less than two years.                                                                                                                                                                              | Levels of fasting serum low-density lipoprotein (LDL) cholesterol of less than 80 mg per deciliter (2.1 mmol per liter) or more than 190 mg per deciliter (4.9 mmol per liter), triglyceride levels greater than 1000 mg per deciliter (11.3 mmol per liter); liver function values more than three times the upper limit of normal or equal to those in patients with symptomatic hepatobiliary cholestatic disease; hematopoietic disease or systemic disease unrelated to end-stage renal disease; vascular intervention, congestive heart failure, or myocardial infarction within the three months preceding the period of enrollment; unsuccessful kidney transplantation; and hypertension resistant to therapy (i.e., systolic blood pressure continuously greater than 200 mm Hg or diastolic blood pressure greater than 110 mm Hg). |
| A to Z             | 2004 | Patients between the ages of 21 and 80 years with either non-ST-elevation ACS or ST-elevation MI were eligible for enrollment if they had a total cholesterol level of 250 mg/dL (6.48 mmol/L) or lower.                                                                                                           | Patients receiving statin therapy at the time of randomization, if coronary artery bypass graft surgery was planned, or if PCI was planned within the first 2 weeks after enrollment. Patients also were excluded for having an alanine aminotransferase (ALT) level higher than 20% above the upper limit of normal (ULN); for having an increased risk for myopathy due to renal impairment (serum creatinine level 2.0 mg/dL [176.8 µmol/L]) or concomitant therapy with agents known to enhance myopathy risk, such as fibrates, cyclosporine, macrolide antibiotics, azole antifungals, amiodarone, or verapamil; or for having a prior history of nonexerciserelated elevations in creatine kinase level or nontraumatic rhabdomyolysis.                                                                                                 |
| AFCAPS_<br>TEXCAPS | 1998 | Men aged 45 to 73 years and postmenopausal women aged 55 to 73 years who met the lipid entrance criteria (TC, 4.65-6.82 mmol/L [180-264 mg/dL]; LDL-C, 3.36-4.91 mmol/L [130-190 mg/dL]; HDL-C, 1.16 mmol/L [45 mg/dL] for men or ≤1.22 mmol/L [47 mg/dL] for women; and triglycerides ≤ 4.52 mmol/L [400 mg/dL]). | Individuals with uncontrolled hypertension, secondary hyperlipidemia, or type 1 or type 2 diabetes mellitus that was either managed with insulin or associated with a glycohemoglobin level of at least 10% (20% above the upper limit of normal), had a body weight of more than 50% greater than the desirable limit for height                                                                                                                                                                                                                                                                                                                                                                                                                                                                                                              |

|           |      |                                                                                                                                                                                                                                                                                                                     |                                                                                                                                                                                                                                                                                                                                                                                                                                                                                                                                                                                                                   |
|-----------|------|---------------------------------------------------------------------------------------------------------------------------------------------------------------------------------------------------------------------------------------------------------------------------------------------------------------------|-------------------------------------------------------------------------------------------------------------------------------------------------------------------------------------------------------------------------------------------------------------------------------------------------------------------------------------------------------------------------------------------------------------------------------------------------------------------------------------------------------------------------------------------------------------------------------------------------------------------|
| ALERT     | 2003 | Men and women aged 30–75 years who had received renal or combined renal and pancreas transplants more than 6 months before randomisation and who had stable graft function. All patients were receiving immunosuppressive therapy with ciclosporin and had total serum cholesterol concentrations of 4.0–9.0 mmol/L | Patients who were already taking statins, who had familial hypercholesterolaemia, had experienced acute rejection episodes in the previous 3 months, or who had a predicted life expectancy of less than 1 year.                                                                                                                                                                                                                                                                                                                                                                                                  |
| ASCOT-LLA | 2003 | Men and women aged between 40 and 79 years at randomisation, with either untreated hypertension. Patients had to have total cholesterol concentrations of 6.5 mmol/L or lower, and not currently be taking a statin or a fibrate.                                                                                   | Previous myocardial infarction, currently treated angina, a cerebrovascular event within the previous 3 months, fasting triglycerides higher than 4.5 mmol/L, heart failure, uncontrolled arrhythmias or any clinically important haematological or biochemical abnormality on routine screening.                                                                                                                                                                                                                                                                                                                 |
| AURORA    | 2009 | Men and women 50 to 80 years of age who had end-stage renal disease and had been treated with regular hemodialysis or hemofiltration for at least 3 months were recruited from 280 centers in 25 countries.                                                                                                         | Statin therapy within the previous 6 months, expected kidney transplantation within 1 year, and serious hematologic, neoplastic, gastrointestinal, infectious, or metabolic disease (excluding diabetes) that was predicted to limit life expectancy to less than 1 year, with a history of a malignant condition, active liver disease (indicated by an alanine aminotransferase level that was more than three times the upper limit of the normal range), uncontrolled hypothyroidism, and an unexplained elevation in the creatine kinase level to more than three times the upper limit of the normal range. |
| CARDS     | 2004 | Men and women aged 40–75 years with type 2 diabetes mellitus and had at least one or more of the following: a history of hypertension,; retinopathy; or currently smoking (no minimum number of cigarettes per day was required).                                                                                   | Had any past history of myocardial infarction, angina, coronary vascular surgery, cerebrovascular accident, or severe peripheral vascular disease (defined as warranting surgery). We checked eligibility against the patient's clinical notes and their own recall and assessed lipid eligibility criteria by blood testing at one screening and four pretreatment visits over a 10-week period.                                                                                                                                                                                                                 |

|            |      |                                                                                                                                                                                                                                                                                   |                                                                                                                                                                                                                                                                                                                                                                                                                                                                                                                                                                                                                                                                                                                                                                                                                                                                                                                                                                                                                                                                                                                                                                                                                                                                                                                                                           |
|------------|------|-----------------------------------------------------------------------------------------------------------------------------------------------------------------------------------------------------------------------------------------------------------------------------------|-----------------------------------------------------------------------------------------------------------------------------------------------------------------------------------------------------------------------------------------------------------------------------------------------------------------------------------------------------------------------------------------------------------------------------------------------------------------------------------------------------------------------------------------------------------------------------------------------------------------------------------------------------------------------------------------------------------------------------------------------------------------------------------------------------------------------------------------------------------------------------------------------------------------------------------------------------------------------------------------------------------------------------------------------------------------------------------------------------------------------------------------------------------------------------------------------------------------------------------------------------------------------------------------------------------------------------------------------------------|
| CARE       | 1996 | Men and postmenopausal women had an acute myocardial infarction between 3 and 20 months before randomization, were 21 to 75 years of age, and had plasma total cholesterol levels of less than 240 mg per deciliter, LDL cholesterol levels of 115 to 174 mg per deciliter.       | Patients with serious noncardiovascular disease likely to interfere with participation or to cause death before the trial is over, with contraindications to pravastatin.                                                                                                                                                                                                                                                                                                                                                                                                                                                                                                                                                                                                                                                                                                                                                                                                                                                                                                                                                                                                                                                                                                                                                                                 |
| CORONA     | 2007 | Patients who were at least 60 years of age and who had chronic New York Heart Association (NYHA) class II, III, or IV heart failure of ischemic cause (as reported by investigators) and an ejection fraction of no more than 40% (no more than 35% in patients in NYHA class II) | Previous statin-induced myopathy or hypersensitivity reaction; decompensated heart failure or a need for inotropic therapy; myocardial infarction within the past 6 months; unstable angina or stroke within the past 3 months; percutaneous coronary intervention (PCI), coronary-artery bypass grafting (CABG), or the implantation of a cardioverter–defibrillator or biventricular pacemaker within the past 3 months or a planned implantation of such a device; previous or planned heart transplantation; clinically significant, uncorrected primary valvular heart disease or a malfunctioning prosthetic valve; hypertrophic cardiomyopathy; acute endomyocarditis or myocarditis, pericardial disease, or systemic disease (e.g., amyloidosis); acute or chronic liver disease; levels of alanine aminotransferase or thyrotropin of more than 2 times the upper limit of the normal range; a serum creatinine level of more than 2.5 mg per deciliter (221 µmol per liter); chronic muscle disease or an unexplained creatine kinase level of more than 2.5 times the upper limit of the normal range; previous treatment with cyclosporine; any other condition that would substantially reduce life expectancy or limit compliance with the protocol; or the receipt of less than 80% of dispensed placebo tablets during the run-in period |
| HIJ-PROPER | 2017 | All participants had been hospitalized for ST-segment elevation myocardial infarction (STEMI) or for non-ST-segment elevation myocardial infarction (NSTEMI) or unstable angina (UA) within 72 h before randomization, with at least 20 years of age.                             | The occurrence within 24 hours before enrolment of (i) hemodynamic instabilities such as hypotension, pulmonary oedema, congestive heart failure, acute mitral regurgitation, or ventricular rupture; (ii) ischaemic events (stroke, recurrent symptoms of cardiac ischaemia, acute occlusion of target vessel); and (iii) arrhythmic events (ventricular fibrillation, sustained ventricular tachycardia, advanced heart block).                                                                                                                                                                                                                                                                                                                                                                                                                                                                                                                                                                                                                                                                                                                                                                                                                                                                                                                         |



|            |      |                                                                                                                                                                                                                                                           |                                                                                                                                                                                                                                                                                                                                                                                                                                                                                                                                                                                                                                                                                                                                                                                                                                                                                                                           |
|------------|------|-----------------------------------------------------------------------------------------------------------------------------------------------------------------------------------------------------------------------------------------------------------|---------------------------------------------------------------------------------------------------------------------------------------------------------------------------------------------------------------------------------------------------------------------------------------------------------------------------------------------------------------------------------------------------------------------------------------------------------------------------------------------------------------------------------------------------------------------------------------------------------------------------------------------------------------------------------------------------------------------------------------------------------------------------------------------------------------------------------------------------------------------------------------------------------------------------|
|            |      | Low-density lipoprotein cholesterol was at least 100 mg/dL (2.6 mmol/L).                                                                                                                                                                                  |                                                                                                                                                                                                                                                                                                                                                                                                                                                                                                                                                                                                                                                                                                                                                                                                                                                                                                                           |
| HOPE-3     | 2016 | Men 55 years of age or older and women 65 years of age or older who had at least one of cardiovascular risk factors                                                                                                                                       | Participants with cardiovascular disease and those with an indication for or contraindication to statins, angiotensin-receptor blockers, angiotensin-converting–enzyme inhibitors, or thiazide diuretics                                                                                                                                                                                                                                                                                                                                                                                                                                                                                                                                                                                                                                                                                                                  |
| HPS        | 2002 | Men and women aged about 40–80 years with non-fasting blood total cholesterol concentrations of at least 3.5 mmol/L (135 mg/dL) if they were considered to be at substantial 5-year risk of death from coronary heart disease.                            | Patients had: chronic liver disease (cirrhosis or hepatitis) or evidence of abnormal liver function (eg, alanine aminotransferase >67 IU/L [1.5 times the central laboratory upper limit of normal: ULN]); severe renal disease or evidence of impaired renal function (creatinine >200 mmol/L); inflammatory muscle disease (eg, dermatomyositis or polymyositis) or evidence of muscle problems (creatinine kinase >750 IU/L [3 ULN]); concurrent treatment with ciclosporin, fibrates, or high-dose niacin; child-bearing potential (premenopausal woman not sterilised or using reliable contraception); severe heart failure; some lifethreatening condition other than vascular disease or diabetes (eg, severe chronic airways disease or any cancer other than non-melanoma skin cancer); or conditions that might limit long-term compliance (eg, severely disabling stroke, dementia, or psychiatric disorder). |
| IMPROVE-IT | 2015 | Men and women who were at least 50 years of age if they had been hospitalized within the preceding 10 days for an acute coronary syndrome. Patients were required to have an LDL cholesterol level of 50 mg per deciliter (1.3 mmol per liter) or higher. | Planned coronary-artery bypass grafting for the acute coronary syndrome event, creatinine clearance of less than 30 ml per minute, active liver disease, or use of statin therapy that had LDL cholesterol–lowering potency greater than 40 mg of simvastatin.                                                                                                                                                                                                                                                                                                                                                                                                                                                                                                                                                                                                                                                            |

|            |      |                                                                                                                                                                                                                                                                                                                                                                         |                                                                                                                                                                                                                                                                                                                                                                                                                                                                                                                                                                                                                                                                                                                                                                                                                                                                                                                                                                                                                                                                                                                                                                                                                                                                                                                                                                                                         |
|------------|------|-------------------------------------------------------------------------------------------------------------------------------------------------------------------------------------------------------------------------------------------------------------------------------------------------------------------------------------------------------------------------|---------------------------------------------------------------------------------------------------------------------------------------------------------------------------------------------------------------------------------------------------------------------------------------------------------------------------------------------------------------------------------------------------------------------------------------------------------------------------------------------------------------------------------------------------------------------------------------------------------------------------------------------------------------------------------------------------------------------------------------------------------------------------------------------------------------------------------------------------------------------------------------------------------------------------------------------------------------------------------------------------------------------------------------------------------------------------------------------------------------------------------------------------------------------------------------------------------------------------------------------------------------------------------------------------------------------------------------------------------------------------------------------------------|
| JUPITER    | 2008 | Men 50 years of age or older and women 60 years of age or older if they did not have a history of cardiovascular disease and if, at the initial screening visit, they had an LDL cholesterol level of less than 130 mg per deciliter (3.4 mmol per liter) and a high-sensitivity C-reactive protein level of 2.0 mg per liter or more.                                  | previous or current use of lipid-lowering therapy, current use of postmenopausal hormone-replacement therapy, evidence of hepatic dysfunction (an alanine aminotransferase level that was more than twice the upper limit of the normal range), a creatine kinase level that was more than three times the upper limit of the normal range, a creatinine level that was higher than 2.0 mg per deciliter (176.8 $\mu$ mol per liter), diabetes, uncontrolled hypertension (systolic blood pressure >190 mm Hg or diastolic blood pressure >100 mm Hg), cancer within 5 years before enrollment (with the exception of basal-cell or squamous-cell carcinoma of the skin), uncontrolled hypothyroidism (a thyroid-stimulating hormone level that was more than 1.5 times the upper limit of the normal range), and a recent history of alcohol or drug abuse or another medical condition that might compromise safety or the successful completion of the study. Because a core scientific hypothesis of the trial concerned the role of underlying low-grade inflammation as evidenced by elevated high-sensitivity C-reactive protein levels, patients with inflammatory conditions such as severe arthritis, lupus, or inflammatory bowel disease were excluded, as were patients taking immunosuppressant agents such as cyclosporine, tacrolimus, azathioprine, or long-term oral glucocorticoids. |
| LIPID      | 1998 | Patients had an acute myocardial infarction or had a hospital discharge diagnosis of unstable angina between 3 and 36 months before study entry, and the plasma total cholesterol level measured four weeks before randomization was required to be 155 to 271 mg per deciliter and the fasting triglyceride level less than 445 mg per deciliter (5.0 mmol per liter). | A clinically significant medical or surgical event within three months before study entry, cardiac failure, renal or hepatic disease, and the current use of any cholesterol-lowering agents.                                                                                                                                                                                                                                                                                                                                                                                                                                                                                                                                                                                                                                                                                                                                                                                                                                                                                                                                                                                                                                                                                                                                                                                                           |
| Liu, et al | 2016 | (1) Stable angina with inducible myocardial ischemia and indication for coronary angiography or (2) ACS requiring primary or elective PCI                                                                                                                                                                                                                               | Chronic atorvastatin use $\geq$ 20 mg/d (or equivalent dose of other statins) before PCI, abnormal liver enzymes (alanine aminotransferase [ALT] or aspartate aminotransferase [AST] more than 40 U/L); blood creatinine >2 mg/dL, or muscle disease.                                                                                                                                                                                                                                                                                                                                                                                                                                                                                                                                                                                                                                                                                                                                                                                                                                                                                                                                                                                                                                                                                                                                                   |

|                  |      |                                                                                                                                                                                                                                               |                                                                                                                                                                                                                                                                                                                                                                                                                                                                                                                                                                                                                                                                                                                                                                                                                                                                                                                                                                                                                                                                                                                                                                                                       |
|------------------|------|-----------------------------------------------------------------------------------------------------------------------------------------------------------------------------------------------------------------------------------------------|-------------------------------------------------------------------------------------------------------------------------------------------------------------------------------------------------------------------------------------------------------------------------------------------------------------------------------------------------------------------------------------------------------------------------------------------------------------------------------------------------------------------------------------------------------------------------------------------------------------------------------------------------------------------------------------------------------------------------------------------------------------------------------------------------------------------------------------------------------------------------------------------------------------------------------------------------------------------------------------------------------------------------------------------------------------------------------------------------------------------------------------------------------------------------------------------------------|
| PREVEND-IT       | 2004 | Persistent microalbuminuria, a blood pressure 160/100 mm Hg and no use of antihypertensive medication, and a total cholesterol level <8.0 mmol/L, or <5.0 mmol/L                                                                              | Any of the following: creatinine clearance < 60% of the normal age-adjusted value, serum potassium >5.5 mmol/L, history of chronic liver disease, lactate dehydrogenase, aspartate-amino transferase or alanine-amino transferase .3 times the upper limit of normal, use of angiotensin-converting enzyme inhibitors or angiotensin II receptor antagonists, use of insulin, previously documented allergy or intolerance to study drugs, and pregnant or nursing women.                                                                                                                                                                                                                                                                                                                                                                                                                                                                                                                                                                                                                                                                                                                             |
| PROSPER          | 2002 | Men and women aged 70–82 years if they had either pre-existing vascular disease or raised risk of such disease. Their plasma total cholesterol was required to be 4.0–9.0 mmol/L and their triglyceride concentrations less than 6.0 mmol/L.  | Individuals with poor cognitive function (mini mental state examination score <24).                                                                                                                                                                                                                                                                                                                                                                                                                                                                                                                                                                                                                                                                                                                                                                                                                                                                                                                                                                                                                                                                                                                   |
| PROVE IT-TIMI 22 | 2004 | Men and women who were at least 18 years old if they had been hospitalized for an acute coronary syndrome or high-risk unstable angina. Patients had to have a total cholesterol level of 240 mg per deciliter (6.21 mmol per liter) or less. | Had a coexisting condition that shortened expected survival to less than two years, were receiving therapy with any statin at a dose of 80 mg per day at the time of their index event or lipid-lowering therapy with fibric acid derivatives or niacin that could not be discontinued before randomization, had received drugs that are strong inhibitors of cytochrome P-450 3A4 within the month before randomization or were likely to require such treatment during the study period (because atorvastatin is metabolized by this pathway), had undergone percutaneous coronary intervention within the previous six months (other than for the qualifying event) or coronary-artery bypass surgery within the previous two months or were scheduled to undergo bypass surgery in response to the index event, had factors that might prolong the QT interval, had obstructive hepatobiliary disease or other serious hepatic disease, had an unexplained elevation in the creatine kinase level that was more than three times the upper limit of normal and that was not related to myocardial infarction, or had a creatinine level of more than 2.0 mg per deciliter (176.8 μmol per liter). |
| REAL-CAD         | 2018 | Men and women 20 to 80 years of age with stable CAD                                                                                                                                                                                           | Patients with LDL-C <100 mg/dL without statin therapy before enrollment because the label in the instructions for pitavastatin restricted use to patients with hypercholesterolemia.                                                                                                                                                                                                                                                                                                                                                                                                                                                                                                                                                                                                                                                                                                                                                                                                                                                                                                                                                                                                                  |
| SEAS             | 2008 | Men and women between the ages of 45 and 85 years who had asymptomatic, mild-to-moderate aortic valve stenosis, as                                                                                                                            | Patients had received a diagnosis or had symptoms of coronary artery disease, peripheral arterial disease, cerebrovascular disease, or diabetes mellitus or if they had any other condition requiring lipid-lowering therapy.                                                                                                                                                                                                                                                                                                                                                                                                                                                                                                                                                                                                                                                                                                                                                                                                                                                                                                                                                                         |

|         |      |                                                                                                                                                                                                                                                                                         |                                                                                                                                                                                                                                                                                                                                                                                                                                                                                                                                                                                                                                                                                                                                                                                                                                                                                                                                                                                                                                                                                                                                                                                 |
|---------|------|-----------------------------------------------------------------------------------------------------------------------------------------------------------------------------------------------------------------------------------------------------------------------------------------|---------------------------------------------------------------------------------------------------------------------------------------------------------------------------------------------------------------------------------------------------------------------------------------------------------------------------------------------------------------------------------------------------------------------------------------------------------------------------------------------------------------------------------------------------------------------------------------------------------------------------------------------------------------------------------------------------------------------------------------------------------------------------------------------------------------------------------------------------------------------------------------------------------------------------------------------------------------------------------------------------------------------------------------------------------------------------------------------------------------------------------------------------------------------------------|
|         |      | assessed on echocardiography, with a peak aortic-jet velocity of 2.5 to 4 m per second.                                                                                                                                                                                                 |                                                                                                                                                                                                                                                                                                                                                                                                                                                                                                                                                                                                                                                                                                                                                                                                                                                                                                                                                                                                                                                                                                                                                                                 |
| SHARP   | 2011 | Patients aged 40 years and older were eligible to participate if they had chronic kidney disease with more than one previous measurement of serum or plasma creatinine of at least 150 µmol/L (1.7 mg/dL) in men or 130 µmol/L (1.5 mg/dL) in women, whether receiving dialysis or not. | Definite history of MI or coronary revascularization procedure; Functioning renal transplant or living donor renal ; transplant planned; Less than 2 months since presentation as an acute uremic emergency; Definite history of chronic liver disease or abnormal liver function (ie, ALT N1.5x ULN or, if ALT not available, AST N1.5x ULN) (patients with a history of hepatitis are eligible if these limits are not exceeded); Evidence of active inflammatory muscle disease (eg, dermatomyositis, polymyositis) or CK N3x ULN; Definite previous adverse reaction to a statin or to ezetimibe; Concurrent treatment with a contraindicated drug; Child-bearing potential (ie, premenopausal woman who is not using a reliable method of contraception); Known to be poorly compliant with clinic visits or prescribed medication; Medical history that might limit the individual's ability to take the trial treatments for the duration of the study (eg, severe respiratory disease, history of cancer other than nonmelanoma skin cancer or recent history of alcohol or substance misuse)                                                                           |
| TNT     | 2005 | Men and women 35 to 75 years of age who had clinically evident CHD, defined by one or more of the following: previous myocardial infarction, previous or current angina with objective evidence of atherosclerotic CHD, and a history of coronary revascularization.                    | Hypersensitivity to statins; active liver disease or hepatic dysfunction defined as alanine aminotransferase or aspartate aminotransferase >1.5 times the upper limit of normal; women who are pregnant or breastfeeding; patients with nephrotic syndrome; uncontrolled diabetes mellitus; uncontrolled hypothyroidism; uncontrolled hypertension (as defined by the investigator) at the screening visit; a MI, coronary revascularization procedure or severe/unstable angina within 1 month of screening; any planned surgical procedure for the treatment of atherosclerosis; an ejection fraction <30%; hemodynamically important valvular disease; gastrointestinal disease limiting drug absorption or partial ileal bypass; any nonskin malignancy, malignant melanoma or other survival-limiting disease; unexplained creatine phosphokinase levels >6 times the upper limit of normal; concurrent therapy with long-term immunosuppressants; concurrent therapy with lipid-regulating drugs not specified as study treatment in the protocol; history of alcohol abuse; and participation in another clinical trial concurrently or within 30 days before screening. |
| WOSCOPS | 1995 | Males aged 45-64 yr who, at randomization, display at most minor overt evidence of CHD. (1) LDL > 4.0 mmol/l at both                                                                                                                                                                    | NA                                                                                                                                                                                                                                                                                                                                                                                                                                                                                                                                                                                                                                                                                                                                                                                                                                                                                                                                                                                                                                                                                                                                                                              |

|  |                                                                                                                                                                           |  |
|--|---------------------------------------------------------------------------------------------------------------------------------------------------------------------------|--|
|  | screening visits 2 and 3;<br>(2) LDL > 4.5 mmol/l at<br>one or both of screening<br>visits 2 and 3; (3) LDL <<br>6.0 mmol/l at one or both<br>of screening visits 2 and 3 |  |
|--|---------------------------------------------------------------------------------------------------------------------------------------------------------------------------|--|

4D, German Diabetes Dialysis Study—Die Deutsche Diabetes Dialyse Studies; A to Z, Aggrastat to Zocor; AFCAPS-TexCAPS, Air Force/Texas Coronary Atherosclerosis Prevention Study; ALERT, Assessment of LEscol in Renal Transplantation Study; ASCOT-LLA, Anglo-Scandinavian Cardiac Outcomes Trial—Lipid Lowering Arm; AURORA, An Assessment of Survival and Cardiovascular Events; CARDS, Collaborative Atorvastatin Diabetes Study; CARE, Cholesterol And Recurrent Events; CORON, the Controlled Rosuvastatin Multinational Trial in Heart Failure; HIJ-PROPER, the Heart Institute of Japan PROper level of lipid lOwering with Pitavastatin and Ezetimibe in acute coRonary syndrome trial; HOPE-3, Heart Outcomes Prevention Evaluation; HPS, Heart Protection Study; IMPROVE-IT, Improved Reduction of Outcomes: Vytorin Efficacy International Trial; JUPITER, Justification for the Use of Statins in Prevention: an Intervention Trial Evaluating Rosuvastatin study group; LIPID, Long-term Intervention with Pravastatin in Ischaemic Disease; PREVEND IT, the Prevention of REnal and Vascular ENdstage Disease Intervention Trial; PROSPER, PROspective Study of Pravastatin in the Elderly at Risk; PROVE IT-TIMI 22, Pravastatin or Atorvastatin Evaluation and Infection Therapy; REAL-CAD, Randomized Evaluation of Aggressive or Moderate Lipid Lowering Therapy With Pitavastatin in Coronary Artery Disease; SEAS, Simvastatin and Ezetimibe in Aortic Stenosis; SHARP, Study of Heart and Renal Protection; TNT, Treating to New Targets; WOSCOPS, West of Scotland Coronary Prevention Study.



|         |      |          |              |          |              |          |          |           |
|---------|------|----------|--------------|----------|--------------|----------|----------|-----------|
| TNT     | 2005 | Low risk | Low risk     | Low risk | Unclear risk | Low risk | Low risk | Low risk  |
| WOSCOPS | 1995 | Low risk | Unclear risk | Low risk | Low risk     | Low risk | Low risk | High risk |

4D, German Diabetes Dialysis Study—Die Deutsche Diabetes Dialyse Studies; A to Z, Aggrastat to Zocor; AFCAPS-TexCAPS, Air Force/Texas Coronary Atherosclerosis Prevention Study; ALERT, Assessment of LEscol in Renal Transplantation Study; ASCOT-LLA, Anglo-Scandinavian Cardiac Outcomes Trial—Lipid Lowering Arm; AURORA, An Assessment of Survival and Cardiovascular Events; CARDS, Collaborative Atorvastatin Diabetes Study; CARE, Cholesterol And Recurrent Events; CORON, the Controlled Rosuvastatin Multinational Trial in Heart Failure; HIJ-PROPER, the Heart Institute of Japan PROper level of lipid lOwering with Pitavastatin and Ezetimibe in acute coRonary syndrome trial; HOPE-3, Heart Outcomes Prevention Evaluation; HPS, Heart Protection Study; IMPROVE-IT, Improved Reduction of Outcomes: Vytorin Efficacy International Trial; JUPITER, Justification for the Use of Statins in Prevention: an Intervention Trial Evaluating Rosuvastatin study group; LIPID, Long-term Intervention with Pravastatin in Ischaemic Disease; PREVEND IT, the Prevention of RENal and Vascular ENDstage Disease Intervention Trial; PROSPER, PROspective Study of Pravastatin in the Elderly at Risk; PROVE IT-TIMI 22, Pravastatin or Atorvastatin Evaluation and Infection Therapy; REAL-CAD, Randomized Evaluation of Aggressive or Moderate Lipid Lowering Therapy With Pitavastatin in Coronary Artery Disease; SEAS, Simvastatin and Ezetimibe in Aortic Stenosis; SHARP, Study of Heart and Renal Protection; TNT, Treating to New Targets; WOSCOPS, West of Scotland Coronary Prevention Study.

**Table S5. Meta-analysis Excluding Trials with Potential Bias.**

|                                                   | Baseline CRP ≥ median |                        |         | Baseline CRP < median |                        |         | Overall |                        |         |
|---------------------------------------------------|-----------------------|------------------------|---------|-----------------------|------------------------|---------|---------|------------------------|---------|
|                                                   | Trials                | Rate Ratio<br>(95% CI) | P value | Trials                | Rate Ratio<br>(95% CI) | P value | Trials  | Rate Ratio<br>(95% CI) | P value |
| <b>All-cause mortality</b>                        |                       |                        |         |                       |                        |         |         |                        |         |
| Trials with HF or requiring hemodialysis excluded | 10                    | 0.90 (0.83, 0.97)      | 0.007   | 10                    | 0.92 (0.85, 0.99)      | 0.043   | 20      | 0.91 (0.86, 0.96)      | 0.001   |
| Trials with less than 1000 patients excluded      | 12                    | 0.93 (0.88, 0.98)      | 0.004   | 9                     | 0.90 (0.83, 0.98)      | 0.011   | 21      | 0.91 (0.87, 0.96)      | <0.001  |
| Year before 2000 excluded                         | 13                    | 0.93 (0.88, 0.98)      | 0.003   | 6                     | 0.93 (0.86, 1.01)      | 0.099   | 19      | 0.93 (0.89, 0.97)      | 0.001   |
| <b>Cardiovascular mortality</b>                   |                       |                        |         |                       |                        |         |         |                        |         |
| Trials with HF or requiring hemodialysis excluded | 9                     | 0.81 (0.72, 0.91)      | <0.001  | 11                    | 0.85 (0.78, 0.92)      | <0.001  | 20      | 0.83 (0.78, 0.90)      | <0.001  |
| Trials with less than 1000 patients excluded      | 12                    | 0.85 (0.78, 0.93)      | 0.001   | 9                     | 0.81 (0.74, 0.88)      | <0.001  | 21      | 0.84 (0.79, 0.90)      | <0.001  |
| Year before 2000 excluded                         | 11                    | 0.85 (0.77, 0.94)      | 0.001   | 7                     | 0.86 (0.77, 0.96)      | 0.007   | 18      | 0.86 (0.80, 0.92)      | <0.001  |
| <b>Myocardial infarction</b>                      |                       |                        |         |                       |                        |         |         |                        |         |
| Trials with HF or requiring hemodialysis excluded | 11                    | 0.80 (0.69, 0.88)      | <0.001  | 11                    | 0.71 (0.67, 0.76)      | <0.001  | 22      | 0.74 (0.68, 0.80)      | <0.001  |
| Trials with less than 1000 patients excluded      | 13                    | 0.79 (0.72, 0.88)      | <0.001  | 9                     | 0.70 (0.65, 0.76)      | <0.001  | 22      | 0.75 (0.70, 0.81)      | <0.001  |
| Year before 2000 excluded                         | 13                    | 0.80 (0.72, 0.88)      | <0.001  | 7                     | 0.70 (0.63, 0.79)      | <0.001  | 20      | 0.76 (0.70, 0.83)      | <0.001  |
| <b>Stroke</b>                                     |                       |                        |         |                       |                        |         |         |                        |         |
| Trials with HF or requiring hemodialysis excluded | 11                    | 0.79 (0.71, 0.88)      | <0.001  | 11                    | 0.85 (0.77, 0.95)      | 0.003   | 22      | 0.82 (0.77, 0.89)      | <0.001  |
| Trials with less than 1000 patients excluded      | 13                    | 0.84 (0.75, 0.93)      | 0.001   | 9                     | 0.86 (0.77, 0.97)      | 0.017   | 22      | 0.85 (0.79, 0.92)      | <0.001  |



|                                                   |    |                   |        |    |                   |        |    |                   |        |
|---------------------------------------------------|----|-------------------|--------|----|-------------------|--------|----|-------------------|--------|
| Year before 2000 excluded                         | 13 | 0.84 (0.76, 0.94) | 0.001  | 7  | 0.89 (0.75, 1.06) | 0.188  | 20 | 0.86 (0.78, 0.94) | 0.001  |
| <b>Coronary revascularization</b>                 |    |                   |        |    |                   |        |    |                   |        |
| Trials with HF or requiring hemodialysis excluded | 11 | 0.80 (0.73, 0.88) | <0.001 | 10 | 0.77 (0.72, 0.81) | <0.001 | 21 | 0.78 (0.73, 0.83) | <0.001 |
| Trials with less than 1000 patients excluded      | 12 | 0.82 (0.75, 0.89) | <0.001 | 9  | 0.75 (0.70, 0.81) | <0.001 | 21 | 0.78 (0.73, 0.84) | <0.001 |
| Year before 2000 excluded                         | 12 | 0.82 (0.74, 0.90) | <0.001 | 6  | 0.75 (0.68, 0.82) | <0.001 | 18 | 0.79 (0.73, 0.85) | <0.001 |
| <b>MACE</b>                                       |    |                   |        |    |                   |        |    |                   |        |
| Trials with HF or requiring hemodialysis excluded | 11 | 0.80 (0.74, 0.87) | <0.001 | 11 | 0.80 (0.76, 0.85) | <0.001 | 22 | 0.81 (0.77, 0.85) | <0.001 |
| Trials with less than 1000 patients excluded      | 13 | 0.85 (0.79, 0.90) | <0.001 | 9  | 0.79 (0.74, 0.83) | <0.001 | 22 | 0.82 (0.78, 0.86) | <0.001 |
| Year before 2000 excluded                         | 13 | 0.85 (0.79, 0.90) | <0.001 | 7  | 0.81 (0.77, 0.87) | <0.001 | 20 | 0.84 (0.80, 0.88) | <0.001 |

CRP, C-reactive protein; MACE, major adverse cardiovascular event.

**Table S6. Sensitivity Analysis Stratified for Agent Used in the More-intensive Treatment Group.**

|                                   |                               | Subgroup | Statin |                     |         | Statin + ezetimibe |                     |         |
|-----------------------------------|-------------------------------|----------|--------|---------------------|---------|--------------------|---------------------|---------|
|                                   |                               |          | Trials | Rate Ratio (95% CI) | P value | Trials             | Rate Ratio (95% CI) | P value |
| <b>All-cause mortality</b>        | Baseline CRP                  | < median | 8      | 0.89 (0.82, 0.97)   | 0.005   | 1                  | 1.04 (0.80, 1.36)   | 0.763   |
|                                   |                               | ≥ median | 10     | 0.91 (0.86, 0.97)   | <0.001  | 3                  | 0.99 (0.90, 1.08)   | 0.745   |
|                                   | Magnitude of reduction in CRP | < median | 4      | 0.81 (0.74, 0.88)   | <0.001  | 2                  | 0.99 (0.92, 1.07)   | 0.839   |
|                                   |                               | ≥ median | 8      | 0.91 (0.87, 0.96)   | <0.001  | 1                  | 1.02 (0.94, 1.10)   | 0.671   |
|                                   |                               | Total    | 19     | 0.90 (0.86, 0.94)   | <0.001  | 4                  | 1.00 (0.94, 1.05)   | 0.91    |
| <b>Cardiovascular mortality</b>   | Baseline CRP                  | < median | 9      | 0.81 (0.74, 0.88)   | <0.001  | 1                  | 0.85 (0.58, 1.24)   | 0.385   |
|                                   |                               | ≥ median | 10     | 0.82 (0.73, 0.91)   | <0.001  | 2                  | 0.97 (0.88, 1.06)   | 0.481   |
|                                   | Magnitude of reduction in CRP | < median | 5      | 0.76 (0.68, 0.85)   | <0.001  | 2                  | 0.98 (0.88, 1.10)   | 0.786   |
|                                   |                               | ≥ median | 9      | 0.84 (0.75, 0.94)   | 0.002   | 1                  | 0.92 (0.80, 1.07)   | 0.278   |
|                                   |                               | Total    | 19     | 0.82 (0.77, 0.88)   | <0.001  | 3                  | 0.96 (0.88, 1.05)   | 0.374   |
| <b>Myocardial infarction</b>      | Baseline CRP                  | < median | 9      | 0.70 (0.65, 0.76)   | <0.001  | 1                  | 0.65 (0.39, 1.08)   | 0.094   |
|                                   |                               | ≥ median | 11     | 0.75 (0.67, 0.86)   | <0.001  | 3                  | 0.88 (0.82, 0.96)   | 0.002   |
|                                   | Magnitude of reduction in CRP | < median | 5      | 0.71 (0.58, 0.87)   | 0.001   | 2                  | 0.84 (0.70, 1.02)   | 0.08    |
|                                   |                               | ≥ median | 9      | 0.72 (0.64, 0.82)   | <0.001  | 1                  | 0.92 (0.76, 1.11)   | 0.378   |
|                                   |                               | Total    | 21     | 0.73 (0.68, 0.78)   | <0.001  | 4                  | 0.88 (0.81, 0.95)   | 0.001   |
| <b>Stroke</b>                     | Baseline CRP                  | < median | 9      | 0.86 (0.76, 0.97)   | 0.011   | 1                  | 1.12 (0.69, 1.82)   | 0.659   |
|                                   |                               | ≥ median | 11     | 0.81 (0.70, 0.93)   | 0.003   | 3                  | 0.85 (0.75, 0.96)   | 0.008   |
|                                   | Magnitude of reduction in CRP | < median | 5      | 0.93 (0.77, 1.12)   | 0.443   | 2                  | 0.88 (0.76, 1.02)   | 0.089   |
|                                   |                               | ≥ median | 9      | 0.79 (0.68, 0.91)   | 0.001   | 1                  | 0.83 (0.68, 1.01)   | 0.065   |
|                                   |                               | Total    | 21     | 0.83 (0.76, 0.91)   | <0.001  | 4                  | 0.86 (0.77, 0.97)   | 0.014   |
| <b>Coronary Revascularization</b> | Baseline CRP                  | < median | 8      | 0.76 (0.71, 0.82)   | <0.001  | 1                  | 0.68 (0.49, 0.94)   | 0.018   |
|                                   |                               | ≥ median | 10     | 0.78 (0.70, 0.86)   | <0.001  | 3                  | 0.89 (0.80, 0.98)   | 0.022   |
|                                   | Magnitude of reduction in CRP | < median | 4      | 0.83 (0.76, 0.90)   | <0.001  | 2                  | 0.83 (0.60, 1.14)   | 0.253   |
|                                   |                               | ≥ median | 8      | 0.76 (0.68, 0.84)   | <0.001  | 1                  | 0.80 (0.69, 0.94)   | 0.005   |
|                                   |                               | Total    | 19     | 0.77 (0.72, 0.81)   | <0.001  | 4                  | 0.85 (0.75, 0.96)   | 0.010   |
| <b>MACE</b>                       | Baseline CRP                  | < median | 9      | 0.77 (0.73, 0.81)   | <0.001  | 1                  | 0.93 (0.81, 1.07)   | 0.332   |
|                                   |                               | ≥ median | 11     | 0.81 (0.75, 0.88)   | <0.001  | 3                  | 0.91 (0.85, 0.97)   | 0.004   |

|  |                               |          |    |                   |        |   |                   |        |
|--|-------------------------------|----------|----|-------------------|--------|---|-------------------|--------|
|  | Magnitude of reduction in CRP | < median | 5  | 0.79 (0.72, 0.87) | <0.001 | 2 | 0.94 (0.89, 0.99) | 0.010  |
|  |                               | ≥ median | 9  | 0.81 (0.74, 0.88) | <0.001 | 1 | 0.84 (0.75, 0.95) | 0.004  |
|  |                               | Total    | 21 | 0.80 (0.76, 0.84) | <0.001 | 4 | 0.92 (0.88, 0.96) | <0.001 |

CRP, C-reactive protein; MACE, major adverse cardiovascular event.

**Table S7. Sensitivity Analysis Stratified for the Type of Treatment in the Less-intensive Group.**

|                                   |                               | Subgroup | Active |                        |         | Placebo |                        |         |
|-----------------------------------|-------------------------------|----------|--------|------------------------|---------|---------|------------------------|---------|
|                                   |                               |          | Trials | Rate Ratio<br>(95% CI) | P value | Trials  | Rate Ratio<br>(95% CI) | P value |
| <b>All-cause mortality</b>        | Baseline CRP                  | < median | 2      | 0.90 (0.72, 1.13)      | 0.372   | 7       | 0.90 (0.82, 0.99)      | 0.026   |
|                                   |                               | ≥ median | 5      | 0.82 (0.67, 1.00)      | 0.05    | 8       | 0.94 (0.89, 0.99)      | 0.015   |
|                                   | Magnitude of reduction in CRP | < median | 3      | 0.88 (0.74, 1.04)      | 0.128   | 3       | 0.91 (0.74, 1.13)      | 0.393   |
|                                   |                               | ≥ median | 1      | 0.69 (0.47, 1.00)      | 0.047   | 8       | 0.93 (0.88, 0.98)      | 0.009   |
|                                   |                               | Total    | 7      | 0.87 (0.77, 0.98)      | 0.024   | 15      | 0.92 (0.88, 0.97)      | 0.001   |
| <b>Cardiovascular mortality</b>   | Baseline CRP                  | < median | 2      | 0.80 (0.67, 0.95)      | 0.013   | 8       | 0.81 (0.74, 0.90)      | <0.001  |
|                                   |                               | ≥ median | 3      | 0.89 (0.71, 1.10)      | 0.268   | 9       | 0.84 (0.75, 0.93)      | 0.001   |
|                                   | Magnitude of reduction in CRP | < median | 3      | 0.86 (0.70, 1.06)      | 0.162   | 4       | 0.77 (0.67, 0.87)      | <0.001  |
|                                   |                               | ≥ median | 1      | 0.78 (0.45, 1.35)      | 0.371   | 9       | 0.85 (0.77, 0.94)      | 0.003   |
|                                   |                               | Total    | 5      | 0.86 (0.74, 0.99)      | 0.034   | 17      | 0.84 (0.78, 0.90)      | <0.001  |
| <b>Myocardial infarction</b>      | Baseline CRP                  | < median | 2      | 0.69 (0.50, 0.97)      | 0.031   | 8       | 0.69 (0.63, 0.75)      | <0.001  |
|                                   |                               | ≥ median | 5      | 0.89 (0.82, 0.95)      | 0.001   | 9       | 0.75 (0.66, 0.85)      | <0.001  |
|                                   | Magnitude of reduction in CRP | < median | 3      | 0.83 (0.67, 1.02)      | 0.078   | 4       | 0.69 (0.61, 0.78)      | <0.001  |
|                                   |                               | ≥ median | 1      | 0.89 (0.71, 1.12)      | 0.325   | 9       | 0.73 (0.63, 0.83)      | <0.001  |
|                                   |                               | Total    | 7      | 0.85 (0.77, 0.93)      | 0.001   | 17      | 0.72 (0.66, 0.78)      | <0.001  |
| <b>Stroke</b>                     | Baseline CRP                  | < median | 2      | 0.92 (0.62, 1.36)      | 0.680   | 8       | 0.84 (0.75, 0.95)      | 0.004   |
|                                   |                               | ≥ median | 5      | 0.85 (0.74, 0.97)      | 0.017   | 9       | 0.83 (0.72, 0.95)      | 0.009   |
|                                   | Magnitude of reduction in CRP | < median | 3      | 0.93 (0.76, 1.14)      | 0.496   | 4       | 0.87 (0.73, 1.05)      | 0.141   |
|                                   |                               | ≥ median | 1      | 0.98 (0.54, 1.80)      | 0.955   | 9       | 0.79 (0.69, 0.90)      | <0.001  |
|                                   |                               | Total    | 7      | 0.87 (0.77, 0.99)      | 0.030   | 17      | 0.84 (0.76, 0.92)      | <0.001  |
| <b>Coronary Revascularization</b> | Baseline CRP                  | < median | 2      | 0.79 (0.69, 0.90)      | <0.001  | 7       | 0.72 (0.65, 0.80)      | <0.001  |
|                                   |                               | ≥ median | 5      | 0.92 (0.86, 0.97)      | 0.005   | 8       | 0.76 (0.69, 0.83)      | <0.001  |
|                                   | Magnitude of reduction in CRP | < median | 3      | 0.91 (0.85, 0.98)      | 0.015   | 3       | 0.74 (0.63, 0.87)      | <0.001  |
|                                   |                               | ≥ median | 1      | 0.87 (0.75, 0.99)      | 0.043   | 8       | 0.75 (0.68, 0.82)      | <0.001  |
|                                   |                               | Total    | 7      | 0.85 (0.78, 0.94)      | 0.001   | 15      | 0.74 (0.70, 0.79)      | <0.001  |
| <b>MACE</b>                       | Baseline CRP                  | < median | 2      | 0.80 (0.72, 0.88)      | <0.001  | 8       | 0.78 (0.73, 0.84)      | <0.001  |

|  |                               |          |   |                   |        |    |                   |        |
|--|-------------------------------|----------|---|-------------------|--------|----|-------------------|--------|
|  |                               | ≥ median | 5 | 0.89 (0.83, 0.96) | 0.001  | 9  | 0.82 (0.75, 0.90) | <0.001 |
|  | Magnitude of reduction in CRP | < median | 3 | 0.89 (0.82, 0.98) | 0.016  | 4  | 0.79 (0.67, 0.93) | 0.004  |
|  |                               | ≥ median | 1 | 0.85 (0.76, 0.96) | 0.006  | 9  | 0.81 (0.74, 0.89) | <0.001 |
|  |                               | Total    | 7 | 0.86 (0.80, 0.92) | <0.001 | 17 | 0.81 (0.76, 0.85) | <0.001 |

CRP, C-reactive protein; MACE, major adverse cardiovascular event.

**Table S8. Sensitivity Analysis Stratified for the Type of Population.**

|                                   |                               | Subgroup | Primary Prevention |                        |         | Secondary Prevention |                        |         |
|-----------------------------------|-------------------------------|----------|--------------------|------------------------|---------|----------------------|------------------------|---------|
|                                   |                               |          | Trials             | Rate Ratio<br>(95% CI) | P value | Trials               | Rate Ratio<br>(95% CI) | P value |
| <b>All-cause mortality</b>        | Baseline CRP                  | < median | 6                  | 0.94 (0.86, 1.02)      | 0.127   | 3                    | 0.86 (0.73, 1.00)      | 0.051   |
|                                   |                               | ≥ median | 3                  | 0.87 (0.71, 1.08)      | 0.208   | 6                    | 0.90 (0.81, 1.00)      | 0.051   |
|                                   | Magnitude of reduction in CRP | < median | 2                  | 1.04 (0.84, 1.27)      | 0.739   | 4                    | 0.85 (0.73, 0.98)      | 0.029   |
|                                   |                               | ≥ median | 4                  | 0.90 (0.79, 1.03)      | 0.139   | 2                    | 0.85 (0.63, 1.16)      | 0.301   |
|                                   |                               | Total    | 9                  | 0.93 (0.86, 1.01)      | 0.065   | 9                    | 0.87 (0.79, 0.96)      | 0.004   |
| <b>Cardiovascular mortality</b>   | Baseline CRP                  | < median | 7                  | 0.86 (0.76, 0.98)      | 0.019   | 3                    | 0.78 (0.69, 0.87)      | <0.001  |
|                                   |                               | ≥ median | 3                  | 0.70 (0.46, 1.06)      | 0.091   | 5                    | 0.93 (0.84, 1.04)      | 0.184   |
|                                   | Magnitude of reduction in CRP | < median | 3                  | 0.79 (0.58, 1.09)      | 0.150   | 4                    | 0.83 (0.70, 0.99)      | 0.036   |
|                                   |                               | ≥ median | 4                  | 0.76 (0.58, 0.99)      | 0.042   | 3                    | 0.93 (0.80, 1.08)      | 0.327   |
|                                   |                               | Total    | 10                 | 0.80 (0.69, 0.92)      | 0.002   | 8                    | 0.86 (0.77, 0.95)      | 0.004   |
| <b>Myocardial infarction</b>      | Baseline CRP                  | < median | 7                  | 0.66 (0.58, 0.74)      | <0.001  | 3                    | 0.73 (0.64, 0.83)      | <0.001  |
|                                   |                               | ≥ median | 3                  | 0.63 (0.39, 1.02)      | 0.058   | 7                    | 0.87 (0.81, 0.93)      | <0.001  |
|                                   | Magnitude of reduction in CRP | < median | 3                  | 0.68 (0.59, 0.80)      | <0.001  | 4                    | 0.80 (0.68, 0.94)      | 0.007   |
|                                   |                               | ≥ median | 4                  | 0.64 (0.45, 0.91)      | 0.012   | 3                    | 0.81 (0.72, 0.93)      | 0.002   |
|                                   |                               | Total    | 10                 | 0.66 (0.58, 0.76)      | <0.001  | 10                   | 0.81 (0.75, 0.88)      | <0.001  |
| <b>Stroke</b>                     | Baseline CRP                  | < median | 7                  | 0.86 (0.73, 1.00)      | 0.053   | 3                    | 0.88 (0.71, 1.11)      | 0.001   |
|                                   |                               | ≥ median | 3                  | 0.64 (0.45, 0.92)      | 0.016   | 7                    | 0.83 (0.74, 0.93)      | 0.279   |
|                                   | Magnitude of reduction in CRP | < median | 3                  | 1.07 (0.73, 1.57)      | 0.741   | 4                    | 0.90 (0.78, 1.03)      | 0.121   |
|                                   |                               | ≥ median | 4                  | 0.68 (0.54, 0.85)      | 0.001   | 3                    | 0.80 (0.66, 0.99)      | 0.037   |
|                                   |                               | Total    | 10                 | 0.80 (0.68, 0.92)      | 0.003   | 10                   | 0.85 (0.78, 0.93)      | <0.001  |
| <b>Coronary Revascularization</b> | Baseline CRP                  | < median | 6                  | 0.66 (0.58, 0.75)      | <0.001  | 3                    | 0.80 (0.74, 0.87)      | <0.001  |
|                                   |                               | ≥ median | 3                  | 0.71 (0.56, 0.89)      | 0.003   | 6                    | 0.87 (0.79, 0.95)      | 0.003   |
|                                   | Magnitude of reduction in CRP | < median | 2                  | 0.65 (0.53, 0.79)      | <0.001  | 4                    | 0.89 (0.82, 0.96)      | 0.002   |
|                                   |                               | ≥ median | 4                  | 0.71 (0.60, 0.84)      | <0.001  | 2                    | 0.81 (0.70, 0.93)      | 0.003   |
|                                   |                               | Total    | 9                  | 0.70 (0.64, 0.76)      | <0.001  | 9                    | 0.84 (0.78, 0.90)      | <0.001  |
| <b>MACE</b>                       | Baseline CRP                  | < median | 7                  | 0.78 (0.71, 0.86)      | <0.001  | 3                    | 0.79 (0.73, 0.85)      | <0.001  |

|  |                               |          |    |                   |        |    |                   |        |
|--|-------------------------------|----------|----|-------------------|--------|----|-------------------|--------|
|  |                               | ≥ median | 3  | 0.68 (0.52, 0.90) | 0.007  | 7  | 0.89 (0.84, 0.94) | <0.001 |
|  | Magnitude of reduction in CRP | < median | 3  | 0.79 (0.59, 1.06) | 0.118  | 4  | 0.86 (0.77, 0.95) | 0.004  |
|  |                               | ≥ median | 4  | 0.71 (0.59, 0.86) | <0.001 | 3  | 0.87 (0.78, 0.96) | 0.007  |
|  |                               | Total    | 10 | 0.75 (0.68, 0.83) | <0.001 | 10 | 0.85 (0.80, 0.90) | <0.001 |

CRP, C-reactive protein; MACE, major adverse cardiovascular event.

**Table S9. Multivariable Meta-regression Models for the Association of Each 1-mg/L Reduction in log(baseline CRP Concentration), Magnitude of Reduction in CRP Concentration, and Mortality and Cardiovascular Outcomes in Statin Trials.**

| Outcomes                        | No. of Trials | Rate Ratio (95% CI) |                               |                   |                                                              |                                                                                                                       |
|---------------------------------|---------------|---------------------|-------------------------------|-------------------|--------------------------------------------------------------|-----------------------------------------------------------------------------------------------------------------------|
|                                 |               | log(Baseline CRP)   | Magnitude of reduction in CRP | Achieved CRP      | log(Baseline CRP) Adjusted for Magnitude of reduction in CRP | log(Baseline CRP) Adjusted for Magnitude of reduction in CRP, Baseline LDL-C, Magnitude of reduction in LDL-C and Age |
| <b>All-cause mortality</b>      | 18            | 0.97 (0.90, 1.05)   | 1.01 (0.93, 1.10)             | 1.00 (0.96, 1.04) | 0.98 (0.88, 1.09)                                            | 0.99 (0.86, 1.14)                                                                                                     |
| <b>Cardiovascular mortality</b> | 19            | 0.98 (0.87, 1.10)   | 0.99 (0.88, 1.12)             | 1.00 (0.94, 1.07) | 0.98 (0.83, 1.15)                                            | 1.01 (0.84, 1.22)                                                                                                     |
| <b>Myocardial infarction</b>    | 20            | 1.12 (1.01, 1.23)   | 0.95 (0.84, 1.07)             | 0.99 (0.93, 1.04) | 1.18 (1.06, 1.30)                                            | 1.22 (1.06, 1.41)                                                                                                     |
| <b>Stroke</b>                   | 20            | 0.91 (0.79, 1.04)   | 0.90 (0.78, 1.02)             | 0.96 (0.90, 1.03) | 0.96 (0.80, 1.16)                                            | 0.97 (0.76, 1.24)                                                                                                     |
| <b>Revascularization</b>        | 18            | 1.04 (0.96, 1.12)   | 0.94 (0.85, 1.05)             | 0.99 (0.94, 1.05) | 1.04 (0.96, 1.15)                                            | 1.04 (0.89, 1.22)                                                                                                     |
| <b>MACE</b>                     | 20            | 1.03 (0.95, 1.12)   | 0.97 (0.89, 1.05)             | 0.99 (0.95, 1.04) | 1.05 (0.94, 1.17)                                            | 1.08 (0.95, 1.22)                                                                                                     |

CRP, C-reactive protein; LDL-C, low-density lipoprotein cholesterol; MACE, major adverse cardiovascular event.



**Table S10. Multivariable Meta-regression Models for the Association of Each 1-mg/L Reduction in log(baseline CRP Concentration), Magnitude of Reduction in CRP Concentration, and Mortality and Cardiovascular Outcomes in Secondary Prevention Trials\*.**

| Outcomes                          | No. of Trials | Rate Ratio (95% CI) |                               |                                                              |
|-----------------------------------|---------------|---------------------|-------------------------------|--------------------------------------------------------------|
|                                   |               | log(Baseline CRP)   | Magnitude of Reduction in CRP | log(Baseline CRP) Adjusted for Magnitude of Reduction in CRP |
| <b>All-cause mortality</b>        | 9             | 0.98 (0.87, 1.10)   | 1.09 (0.72, 1.65)             | 1.01 (0.84, 1.22)                                            |
| <b>Cardiovascular mortality</b>   | 8             | 1.03 (0.90, 1.19)   | 1.11 (0.76, 1.61)             | 1.03 (0.86, 1.23)                                            |
| <b>Myocardial infarction</b>      | 10            | 1.12 (1.03, 1.21)   | 1.00 (0.68, 1.48)             | 1.15 (1.02, 1.29)                                            |
| <b>Stroke</b>                     | 10            | 0.95 (0.85, 1.07)   | 0.83 (0.59, 1.17)             | 0.94 (0.82, 1.07)                                            |
| <b>Coronary revascularization</b> | 9             | 1.04 (0.97, 1.11)   | 0.87 (0.67, 1.14)             | 1.06 (0.99, 1.13)                                            |
| <b>MACE</b>                       | 10            | 1.04 (0.98, 1.10)   | 1.02 (0.80, 1.29)             | 1.04 (0.94, 1.14)                                            |

\*Meta-regression analyses were not adjusted for age, baseline LDL-C and magnitude reduction of LDL-C because of limited number of trials.

CRP, C-reactive protein; LDL-C, low-density lipoprotein cholesterol; MACE, major adverse cardiovascular event.

**Table S11. Multivariable Meta-regression Models for the Association of Each 1-mg/L Reduction in log(baseline CRP Concentration), Magnitude of Reduction in CRP Concentration, and Mortality and Cardiovascular Outcomes in Primary Prevention Trials\*.**

| Outcomes                          | No. of Trials | Rate Ratio (95% CI) |                               |                                                              |
|-----------------------------------|---------------|---------------------|-------------------------------|--------------------------------------------------------------|
|                                   |               | log(Baseline CRP)   | Magnitude of Reduction in CRP | log(Baseline CRP) Adjusted for Magnitude of Reduction in CRP |
| <b>All-cause mortality</b>        | 9             | 0.87 (0.71, 1.07)   | 0.92 (0.83, 1.01)             | 0.96 (0.55, 1.66)                                            |
| <b>Cardiovascular mortality</b>   | 10            | 0.82 (0.59, 1.14)   | 0.95 (0.78, 1.15)             | 0.73 (0.22, 2.43)                                            |
| <b>Myocardial infarction</b>      | 10            | 0.91 (0.67, 1.25)   | 0.95 (0.79, 1.14)             | 1.29 (0.35, 4.72)                                            |
| <b>Stroke</b>                     | 10            | 0.71 (0.53, 0.96)   | 0.89 (0.74, 1.05)             | 0.74 (0.22, 2.43)                                            |
| <b>Coronary revascularization</b> | 9             | 1.01 (0.76, 1.35)   | 0.98 (0.83, 1.16)             | 1.11 (0.44, 2.78)                                            |
| <b>MACE</b>                       | 10            | 0.90 (0.73, 1.12)   | 0.96 (0.84, 1.08)             | 0.89 (0.35, 2.27)                                            |

\*Meta-regression analyses were not adjusted for age, baseline LDL-C and magnitude reduction of LDL-C because of limited number of trials.

CRP, C-reactive protein; LDL-C, low-density lipoprotein cholesterol; MACE, major adverse cardiovascular event.

**Figure S1. Identification and Selection of Randomized Clinical Trials Evaluating the Effect of Low-Density Lipoprotein Cholesterol Lowering Therapy on Cardiovascular Outcomes.**

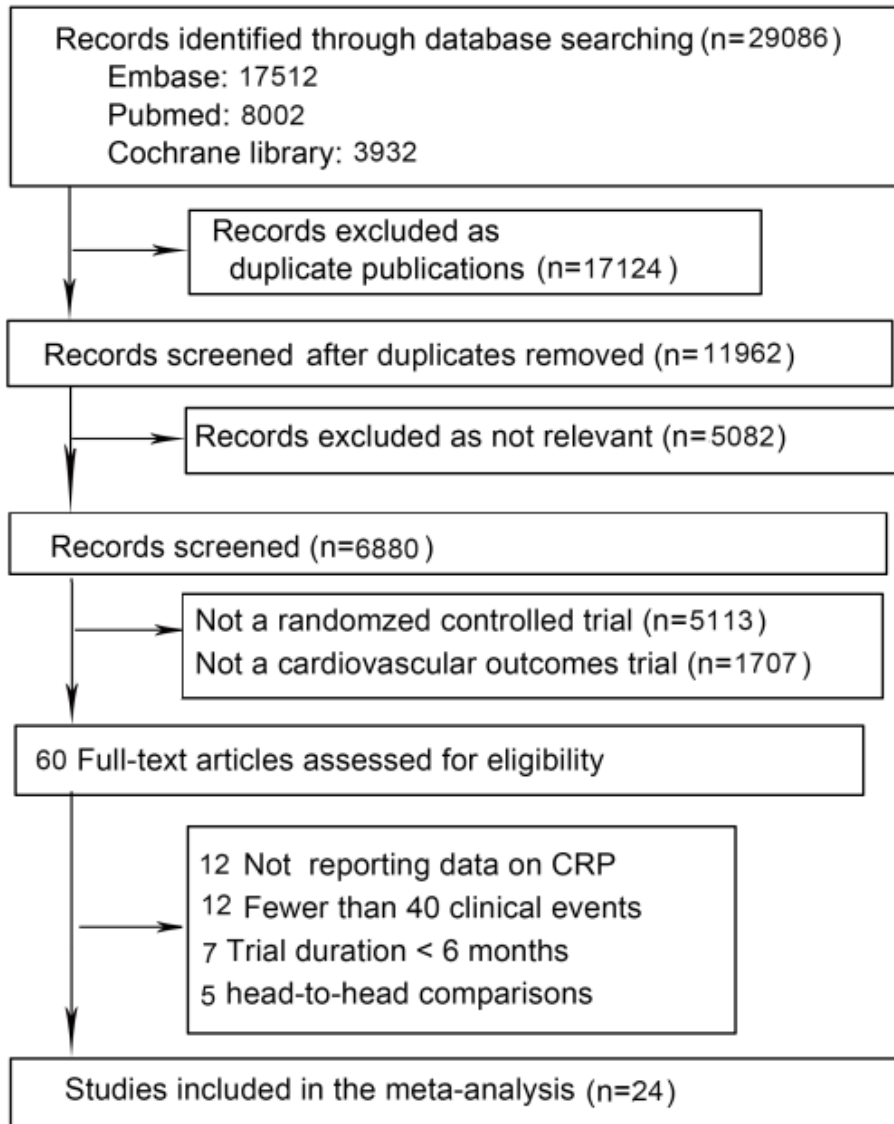

CRP, C-reactive protein.

**Figure S2. Publication Bias. (A) All-cause mortality; (B) cardiovascular mortality; (C) myocardial infarction; (D) stroke; (E) Coronary revascularization; (F) MACE.**

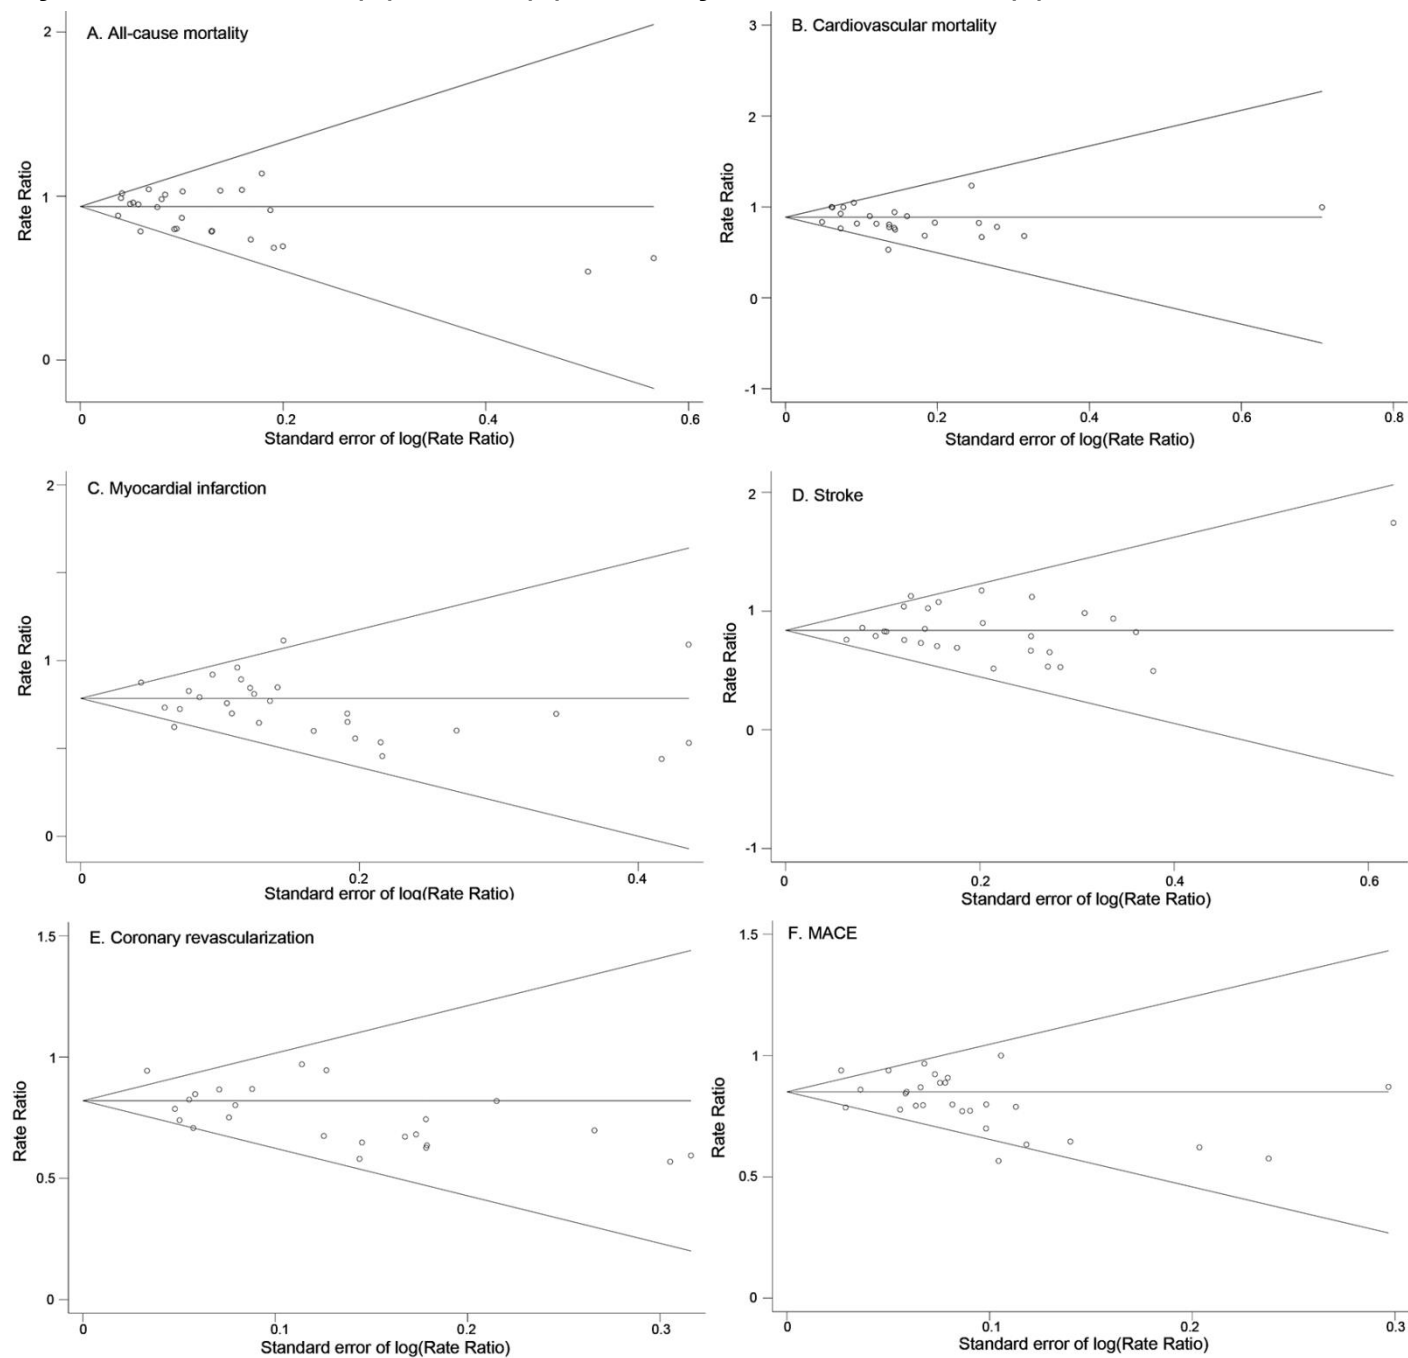

MACE, major adverse cardiovascular event.

**Figure S3. Meta-regression Analysis of All-Cause Mortality Rate Ratio Plotted Against Magnitude of Reduction in CRP Concentrations Between More-intensive and Less-Intensive Lipid-Lowering Group.**

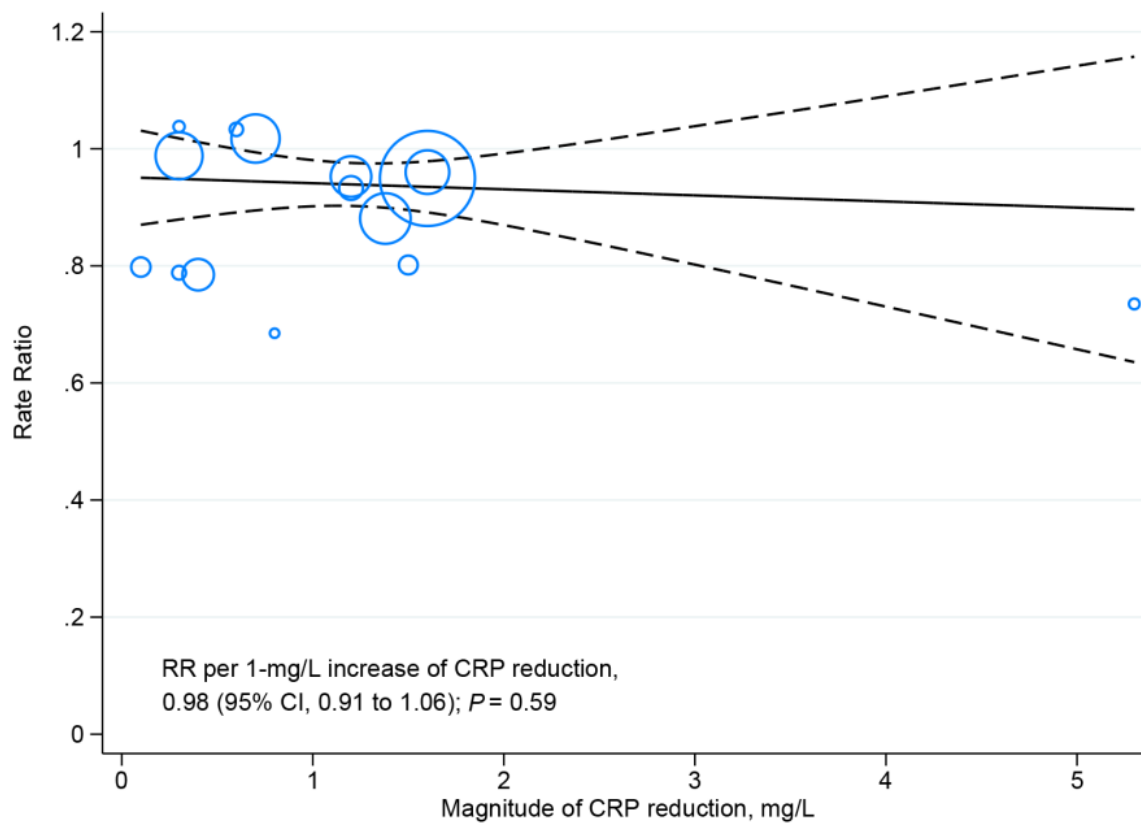

CRP, C-reactive protein; RR, rate ratio.

**Figure S4. Meta-analysis of All-cause Mortality Stratified by Magnitude of Reduction in CRP Concentrations Between More-intensive and Less-intensive Lipid-Lowering Group.**

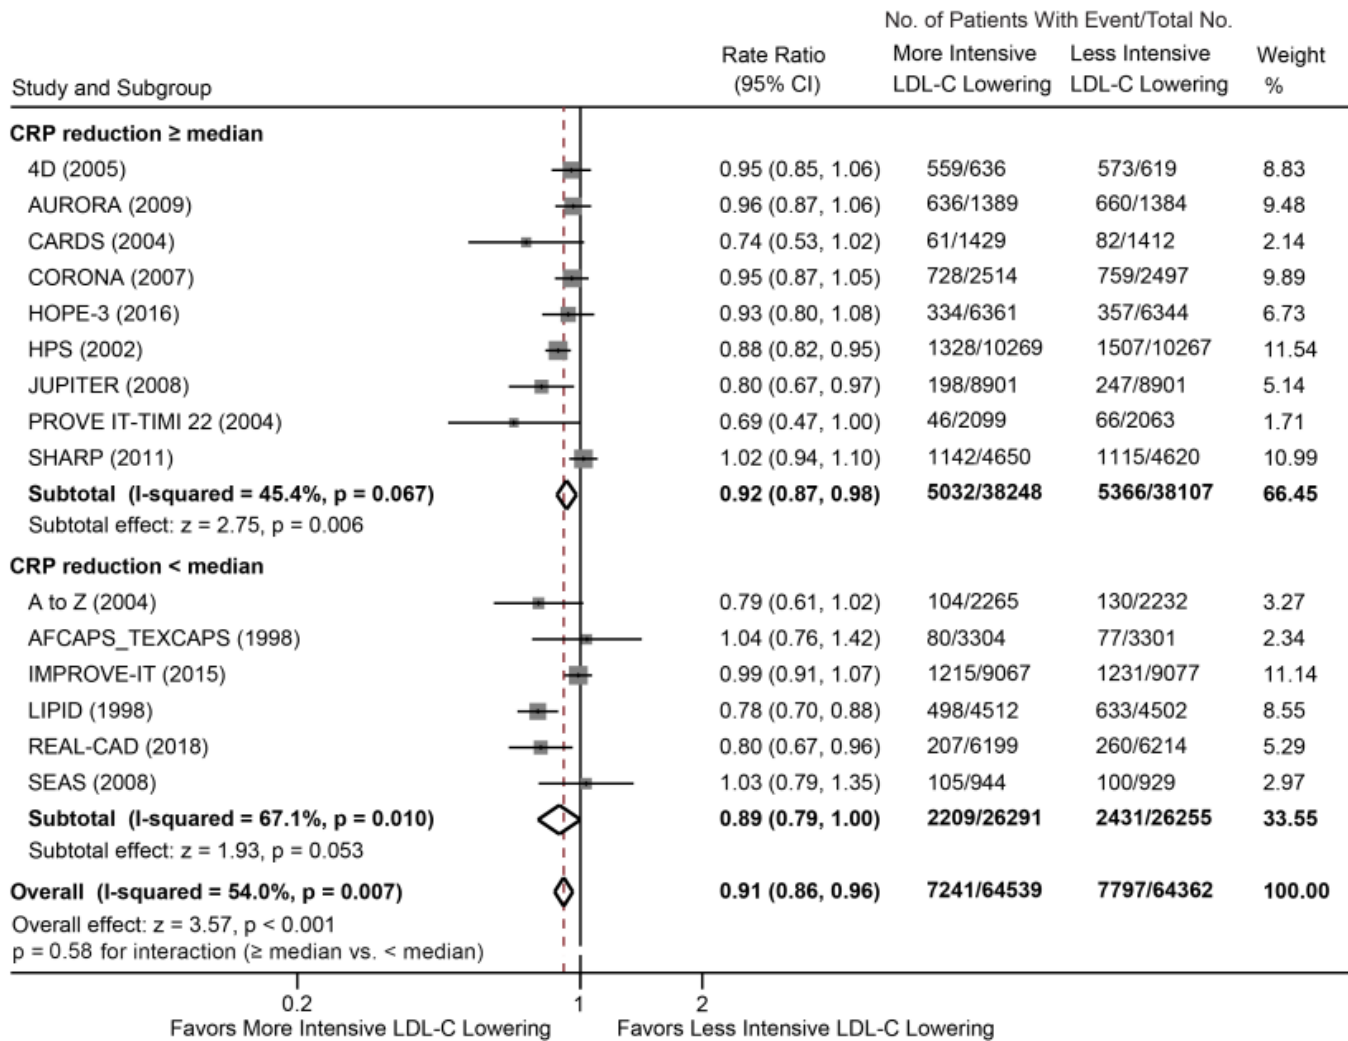

4D, German Diabetes Dialysis Study—Die Deutsche Diabetes Dialyse Studies; A to Z, Aggrastat to Zocor; AFCAPS-TexCAPS, Air Force/Texas Coronary Atherosclerosis Prevention Study; ALERT, Assessment of LEscol in Renal Transplantation Study; ASCOT-LLA, Anglo-Scandinavian Cardiac Outcomes Trial—Lipid Lowering Arm; AURORA, An Assessment of Survival and Cardiovascular Events; CARDS, Collaborative Atorvastatin Diabetes Study; CARE, Cholesterol And Recurrent Events; CORON, the Controlled Rosuvastatin Multinational Trial in Heart Failure; HIJ-PROPER, the Heart Institute of Japan PROper level of lipid lOwering with Pitavastatin and Ezetimibe in acute coRonary syndrome trial; HOPE-3, Heart Outcomes Prevention Evaluation; HPS, Heart Protection Study; IMPROVE-IT, Improved Reduction of Outcomes: Vytorin Efficacy International Trial; JUPITER, Justification for the Use of Statins in Prevention: an Intervention Trial Evaluating Rosuvastatin study group; LIPID, Long-term Intervention with Pravastatin in Ischaemic Disease; PREVEND IT, the Prevention of RENal and Vascular ENdstage Disease Intervention Trial; PROSPER, PROspective Study of Pravastatin in the Elderly at Risk; PROVE IT-TIMI 22, Pravastatin or Atorvastatin Evaluation and Infection Therapy; REAL-CAD, Randomized Evaluation of Aggressive or Moderate Lipid Lowering Therapy With Pitavastatin in Coronary Artery Disease; SEAS, Simvastatin and Ezetimibe in Aortic Stenosis; SHARP, Study of Heart and Renal Protection; TNT, Treating to New Targets; WOSCOPS, West of Scotland Coronary Prevention Study.

**Figure S5. Meta-regression Analysis of Cardiovascular Mortality Rate Ratio Plotted Against Magnitude of Reduction in CRP Concentrations Between More-intensive and Less-intensive Lipid-Lowering Group.**

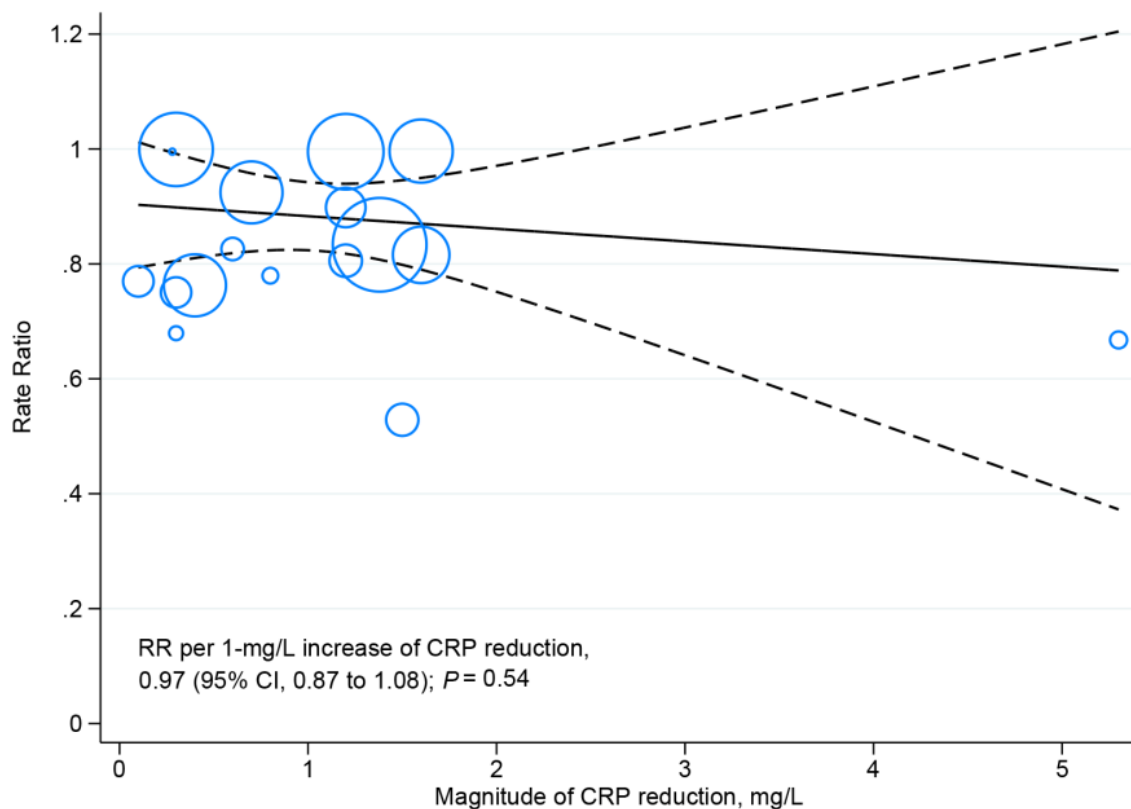

CRP, C-reactive protein; RR, rate ratio.

**Figure S6. Meta-analysis of Cardiovascular Mortality Stratified by Magnitude of Reduction in CRP Concentrations Between More-intensive and Less-intensive Lipid-Lowering Group.**

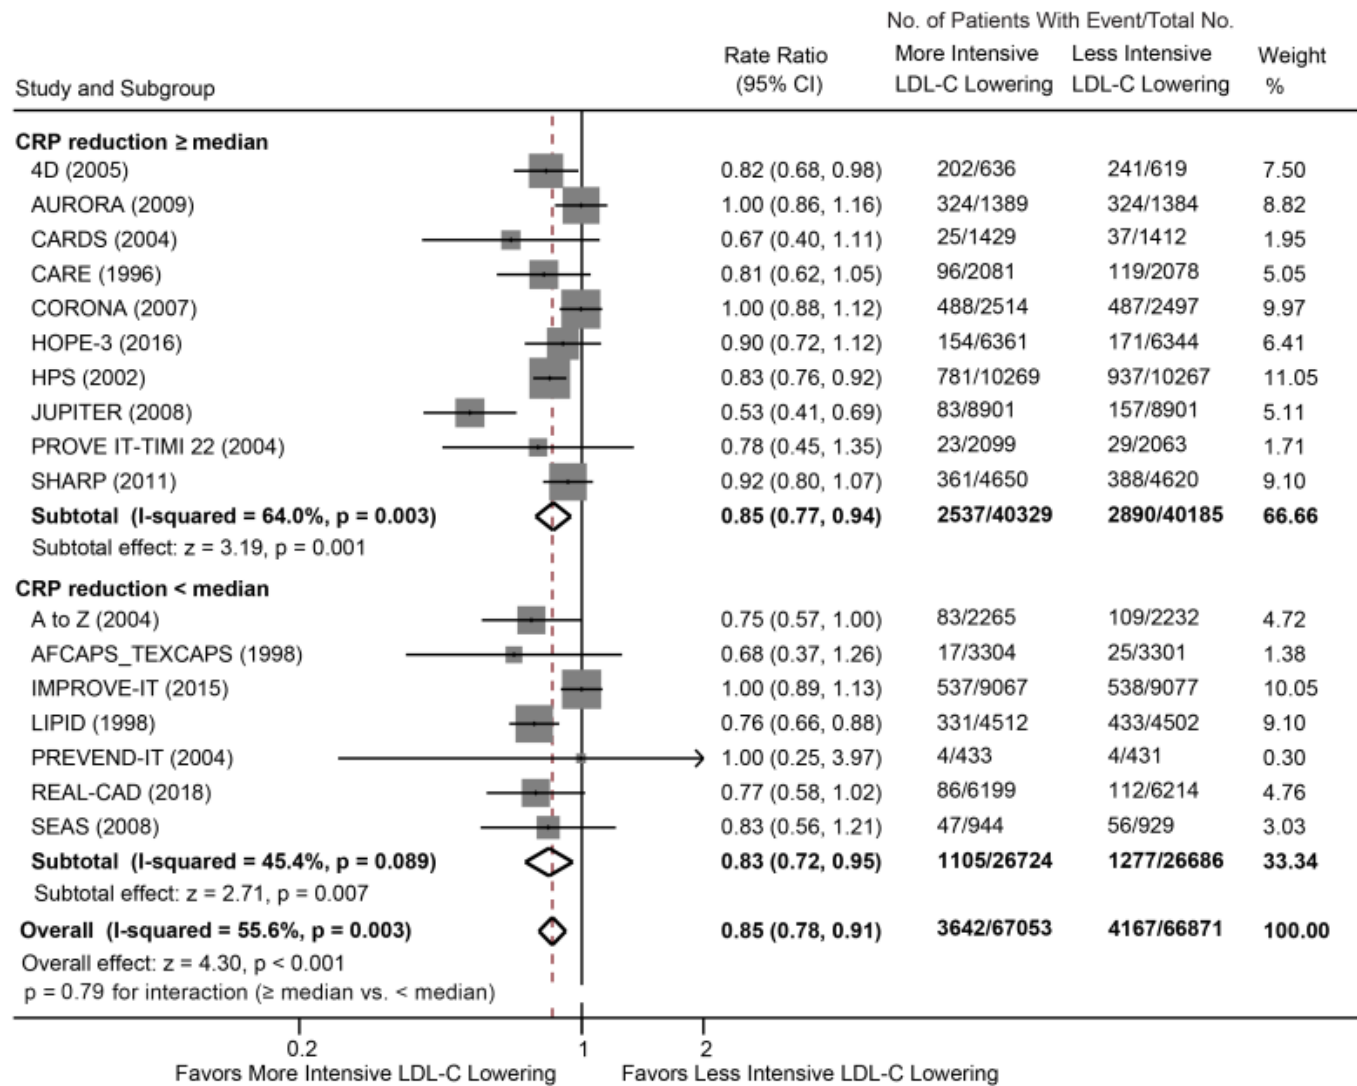

4D, German Diabetes Dialysis Study—Die Deutsche Diabetes Dialyse Studies; A to Z, Aggrastat to Zocor; AFCAPS-TexCAPS, Air Force/Texas Coronary Atherosclerosis Prevention Study; ALERT, Assessment of LEscol in Renal Transplantation Study; ASCOT-LLA, Anglo-Scandinavian Cardiac Outcomes Trial—Lipid Lowering Arm; AURORA, An Assessment of Survival and Cardiovascular Events; CARDS, Collaborative Atorvastatin Diabetes Study; CARE, Cholesterol And Recurrent Events; CORON, the Controlled Rosuvastatin Multinational Trial in Heart Failure; HIJ-PROPER, the Heart Institute of Japan PROper level of lipid lOWering with Pitavastatin and Ezetimibe in acute coRONary syndrome trial; HOPE-3, Heart Outcomes Prevention Evaluation; HPS, Heart Protection Study; IMPROVE-IT, Improved Reduction of Outcomes: Vytorin Efficacy International Trial; JUPITER, Justification for the Use of Statins in Prevention: an Intervention Trial Evaluating Rosuvastatin study group; LIPID, Long-term Intervention with Pravastatin in Ischaemic Disease; PREVEND IT, the Prevention of RENal and Vascular ENDstage Disease Intervention Trial; PROSPER, PROspective Study of Pravastatin in the Elderly at Risk; PROVE IT-TIMI 22, Pravastatin or Atorvastatin Evaluation and Infection Therapy; REAL-CAD, Randomized Evaluation of Aggressive or Moderate Lipid Lowering Therapy With Pitavastatin in Coronary Artery Disease; SEAS, Simvastatin and Ezetimibe in Aortic Stenosis; SHARP, Study of Heart and Renal Protection; TNT, Treating to New Targets; WOSCOPS, West of Scotland Coronary Prevention Study.



**Figure S7. Meta-regression Analysis of Myocardial Infarction Rate Ratio Plotted Against Magnitude of Reduction in CRP Concentrations Between More-intensive and Less-Intensive Lipid-Lowering Group.**

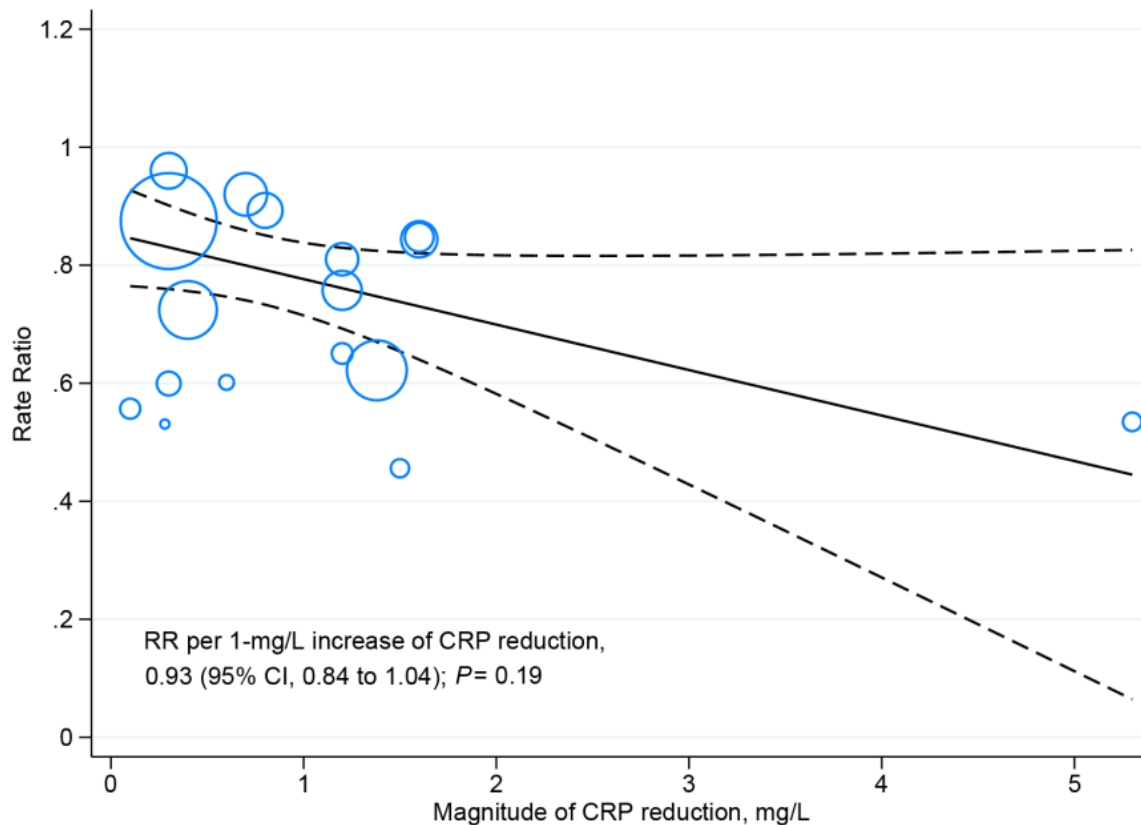

CRP, C-reactive protein; RR, rate ratio.

**Figure S8. Meta-analysis of Myocardial Infarction Stratified by Magnitude of Reduction in CRP Concentrations Between More-intensive and Less-intensive Lipid-Lowering Group.**

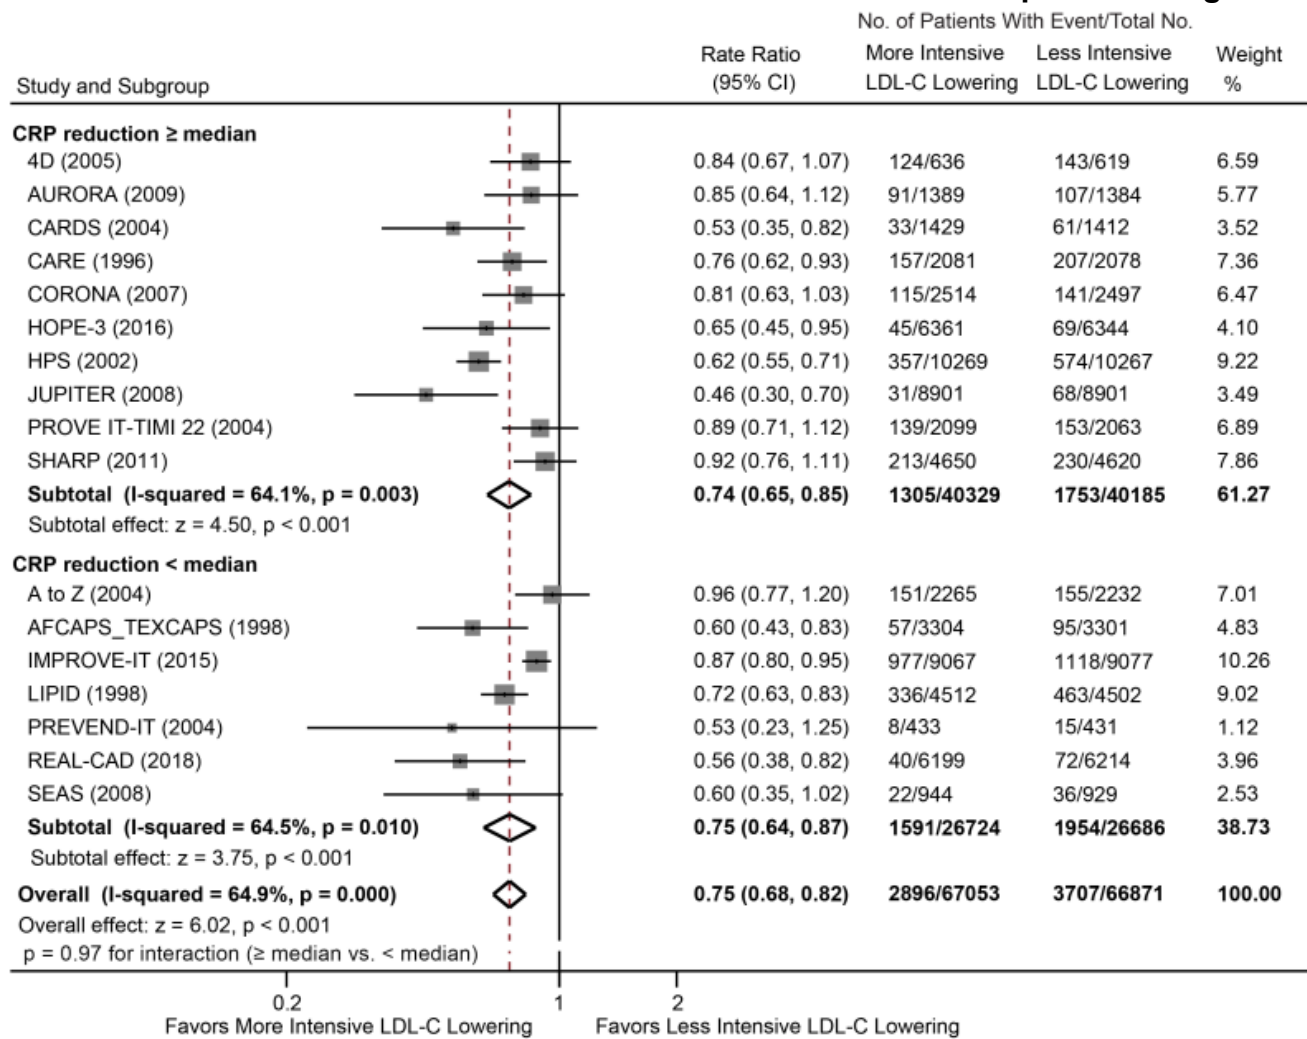

4D, German Diabetes Dialysis Study—Die Deutsche Diabetes Dialyse Studies; A to Z, Aggrastat to Zocor; AFCAPS-TexCAPS, Air Force/Texas Coronary Atherosclerosis Prevention Study; ALERT, Assessment of LEscol in Renal Transplantation Study; ASCOT-LLA, Anglo-Scandinavian Cardiac Outcomes Trial—Lipid Lowering Arm; AURORA, An Assessment of Survival and Cardiovascular Events; CARDS, Collaborative Atorvastatin Diabetes Study; CARE, Cholesterol And Recurrent Events; CORON, the Controlled Rosuvastatin Multinational Trial in Heart Failure; HIJ-PROPER, the Heart Institute of Japan PROper level of lipid lOwering with Pitavastatin and Ezetimibe in acute coRonary syndrome trial; HOPE-3, Heart Outcomes Prevention Evaluation; HPS, Heart Protection Study; IMPROVE-IT, Improved Reduction of Outcomes: Vytorin Efficacy International Trial; JUPITER, Justification for the Use of Statins in Prevention: an Intervention Trial Evaluating Rosuvastatin study group; LIPID, Long-term Intervention with Pravastatin in Ischaemic Disease; PREVEND IT, the Prevention of RENal and Vascular ENDstage Disease Intervention Trial; PROSPER, PROspective Study of Pravastatin in the Elderly at Risk; PROVE IT-TIMI 22, Pravastatin or Atorvastatin Evaluation and Infection Therapy; REAL-CAD, Randomized Evaluation of Aggressive or Moderate Lipid Lowering Therapy With Pitavastatin in Coronary Artery Disease; SEAS, Simvastatin and Ezetimibe in Aortic Stenosis; SHARP, Study of Heart and Renal Protection; TNT, Treating to New Targets; WOSCOPS, West of Scotland Coronary Prevention Study.

**Figure S9. Meta-regression Analysis of Stroke Rate Ratio Plotted Against log(baseline CRP Concentrations) in the More Intensive Group.**

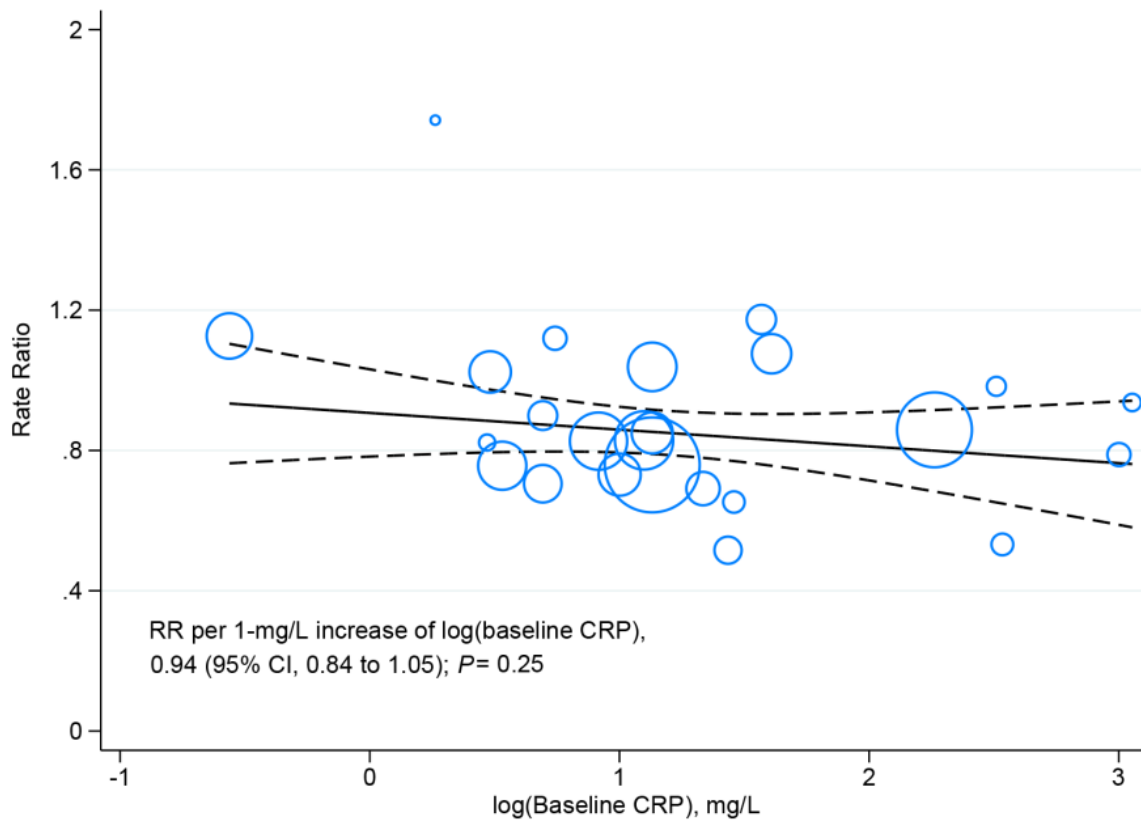

CRP, C-reactive protein; RR, rate ratio.

**Figure S10. Meta-regression Analysis of Stroke Rate Ratio Plotted Against Magnitude of Reduction in CRP Concentrations Between More-intensive and Less-Intensive Lipid-Lowering Group.**

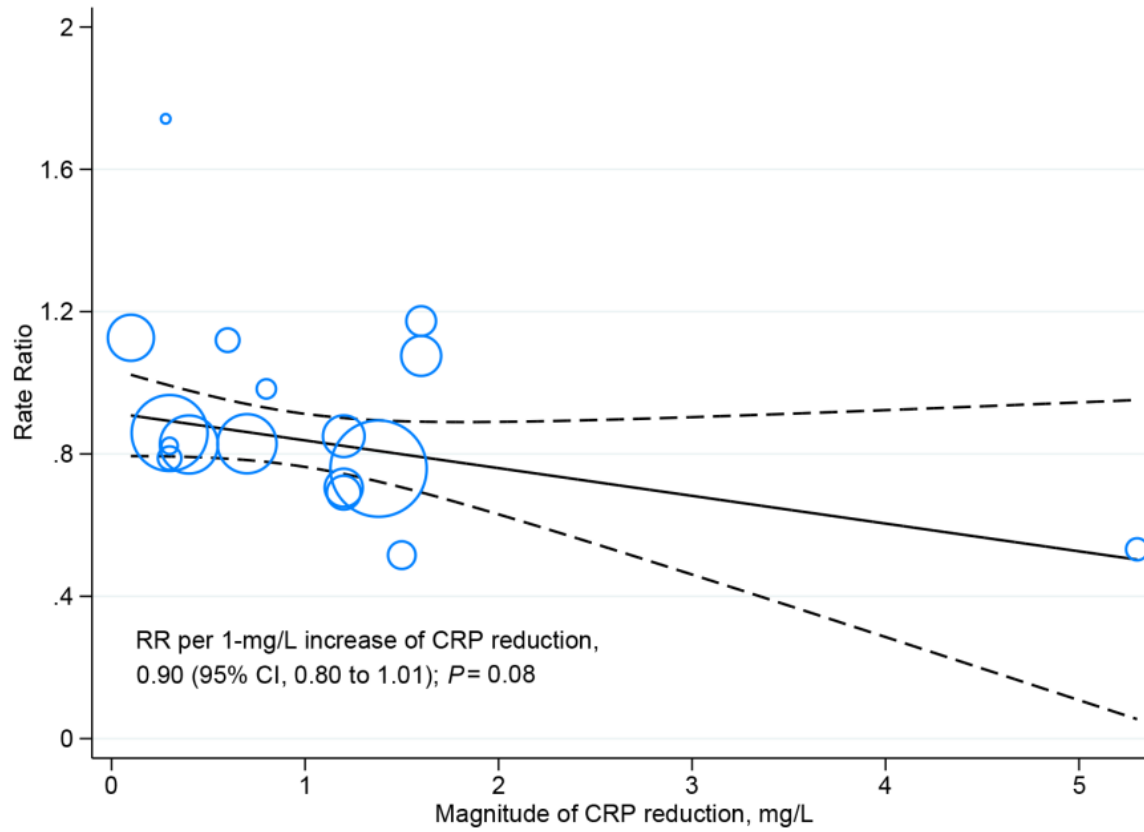

CRP, C-reactive protein; RR, rate ratio.

**Figure S11. Meta-analysis of Stroke Stratified by Baseline CRP Concentrations.**

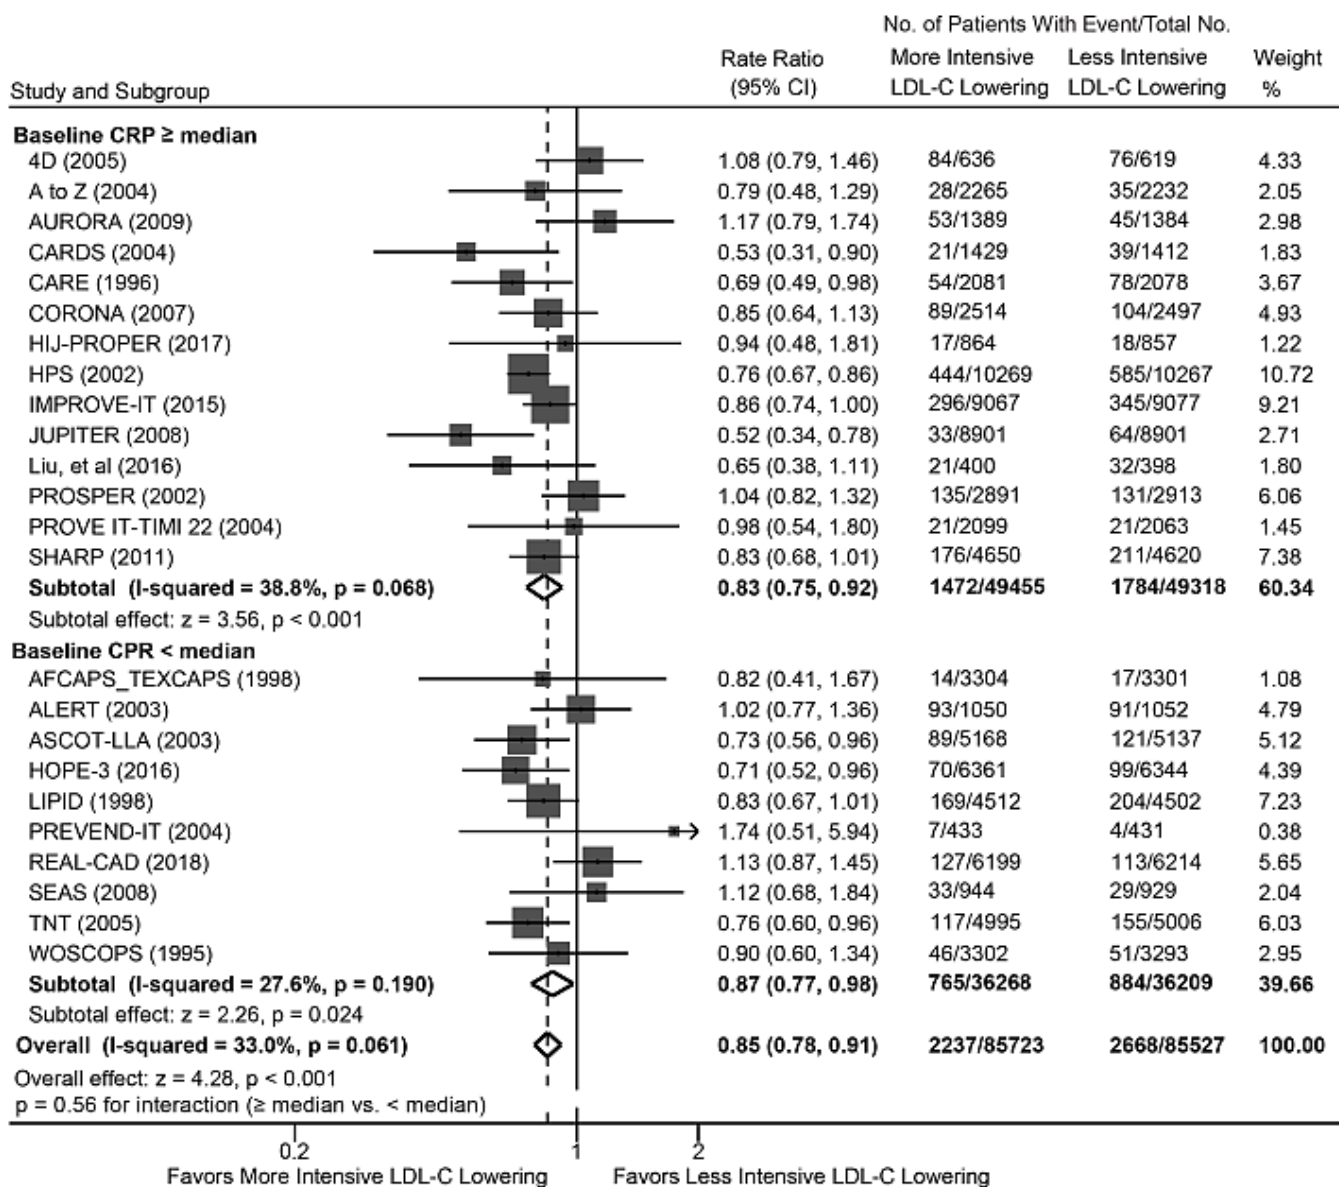

4D, German Diabetes Dialysis Study—Die Deutsche Diabetes Dialyse Studies; A to Z, Aggrastat to Zocor; AFCAPS-TexCAPS, Air Force/Texas Coronary Atherosclerosis Prevention Study; ALERT, Assessment of LEscol in Renal Transplantation Study; ASCOT-LLA, Anglo-Scandinavian Cardiac Outcomes Trial—Lipid Lowering Arm; AURORA, An Assessment of Survival and Cardiovascular Events; CARDS, Collaborative Atorvastatin Diabetes Study; CARE, Cholesterol And Recurrent Events; CORON, the Controlled Rosuvastatin Multinational Trial in Heart Failure; HIJ-PROPER, the Heart Institute of Japan PROper level of lipid lOwering with Pitavastatin and Ezetimibe in acute coRonary syndrome trial; HOPE-3, Heart Outcomes Prevention Evaluation; HPS, Heart Protection Study; IMPROVE-IT, Improved Reduction of Outcomes: Vytorin Efficacy International Trial; JUPITER, Justification for the Use of Statins in Prevention: an Intervention Trial Evaluating Rosuvastatin study group; LIPID, Long-term Intervention with Pravastatin in Ischaemic Disease; PREVEND IT, the Prevention of REnal and Vascular ENdstage Disease Intervention Trial; PROSPER, PROspective Study of Pravastatin in the Elderly at Risk; PROVE IT-TIMI 22, Pravastatin or Atorvastatin Evaluation and Infection Therapy; REAL-CAD, Randomized Evaluation of Aggressive or Moderate Lipid Lowering Therapy With Pitavastatin in Coronary Artery Disease; SEAS, Simvastatin and Ezetimibe in Aortic Stenosis; SHARP, Study of Heart and Renal Protection; TNT, Treating to New Targets; WOSCOPS, West of Scotland Coronary Prevention Study.

**Figure S12. Meta-analysis of Stroke Stratified by Magnitude of Reduction in CRP Concentrations Between More-intensive and Less-Intensive Lipid-Lowering Group.**

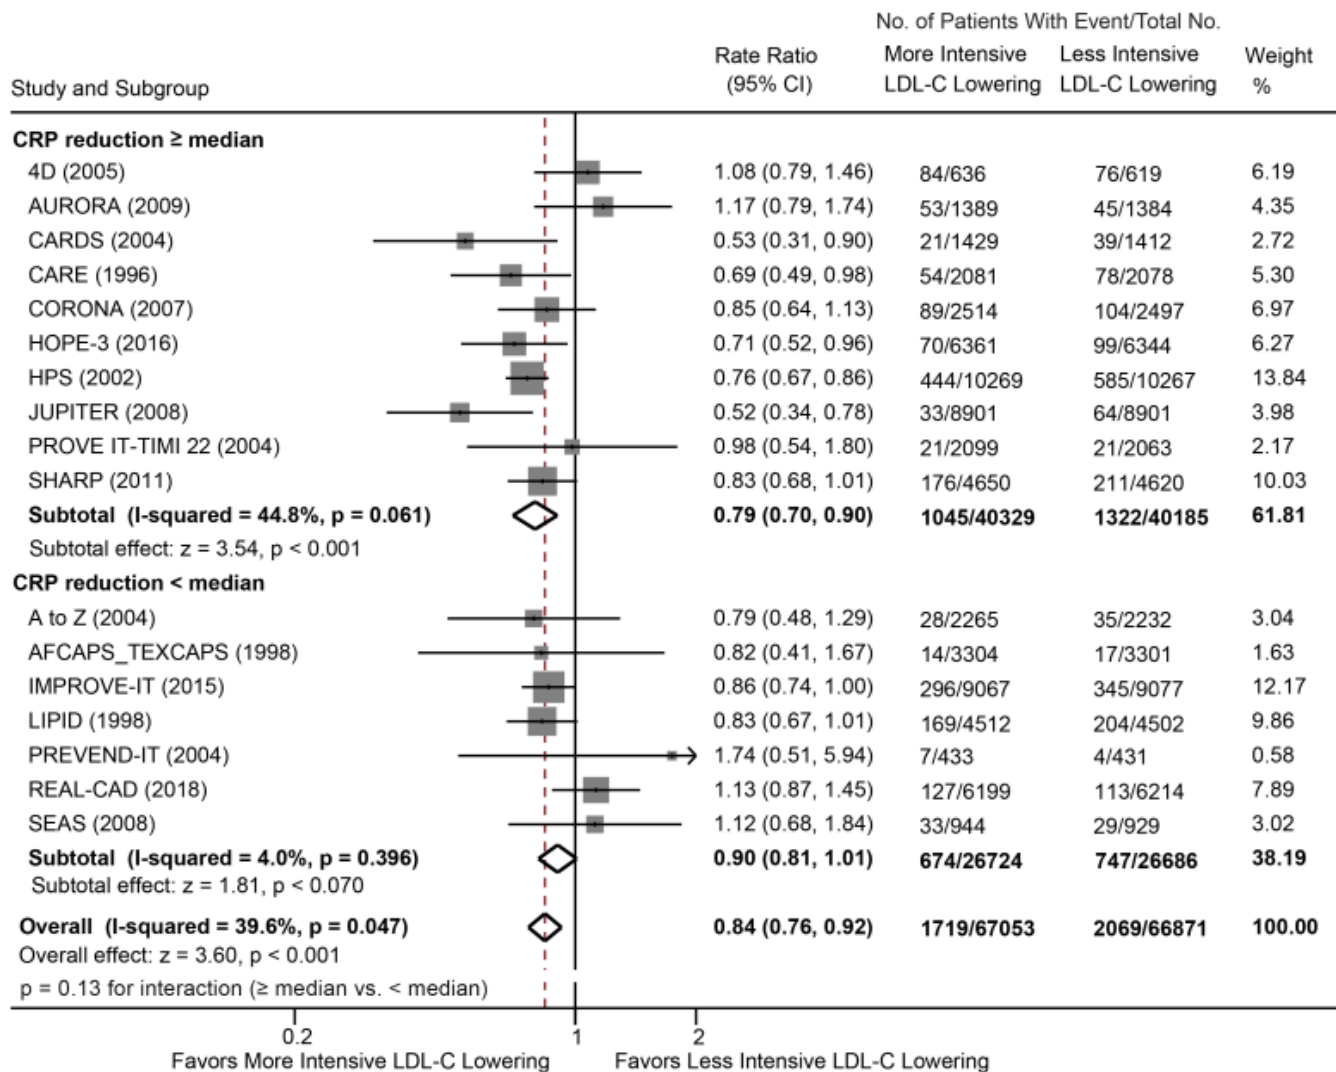

4D, German Diabetes Dialysis Study—Die Deutsche Diabetes Dialyse Studies; A to Z, Aggrastat to Zocor; AFCAPS-TexCAPS, Air Force/Texas Coronary Atherosclerosis Prevention Study; ALERT, Assessment of LEscol in Renal Transplantation Study; ASCOT-LLA, Anglo-Scandinavian Cardiac Outcomes Trial—Lipid Lowering Arm; AURORA, An Assessment of Survival and Cardiovascular Events; CARDS, Collaborative Atorvastatin Diabetes Study; CARE, Cholesterol And Recurrent Events; CORON, the Controlled Rosuvastatin Multinational Trial in Heart Failure; HIJ-PROPER, the Heart Institute of Japan PROper level of lipid lOwering with Pitavastatin and Ezetimibe in acute coRonary syndrome trial; HOPE-3, Heart Outcomes Prevention Evaluation; HPS, Heart Protection Study; IMPROVE-IT, Improved Reduction of Outcomes: Vytorin Efficacy International Trial; JUPITER, Justification for the Use of Statins in Prevention: an Intervention Trial Evaluating Rosuvastatin study group; LIPID, Long-term Intervention with Pravastatin in Ischaemic Disease; PREVEND IT, the Prevention of RENal and Vascular ENdstage Disease Intervention Trial; PROSPER, PROspective Study of Pravastatin in the Elderly at Risk; PROVE IT-TIMI 22, Pravastatin or Atorvastatin Evaluation and Infection Therapy; REAL-CAD, Randomized Evaluation of Aggressive or Moderate Lipid Lowering Therapy With Pitavastatin in Coronary Artery Disease; SEAS, Simvastatin and Ezetimibe in Aortic Stenosis; SHARP, Study of Heart and Renal Protection; TNT, Treating to New Targets; WOSCOPS, West of Scotland Coronary Prevention Study.

**Figure S13. Meta-regression Analysis of Coronary Revascularization Rate Ratio Plotted Against log(baseline CRP Concentrations) in the More Intensive Group.**

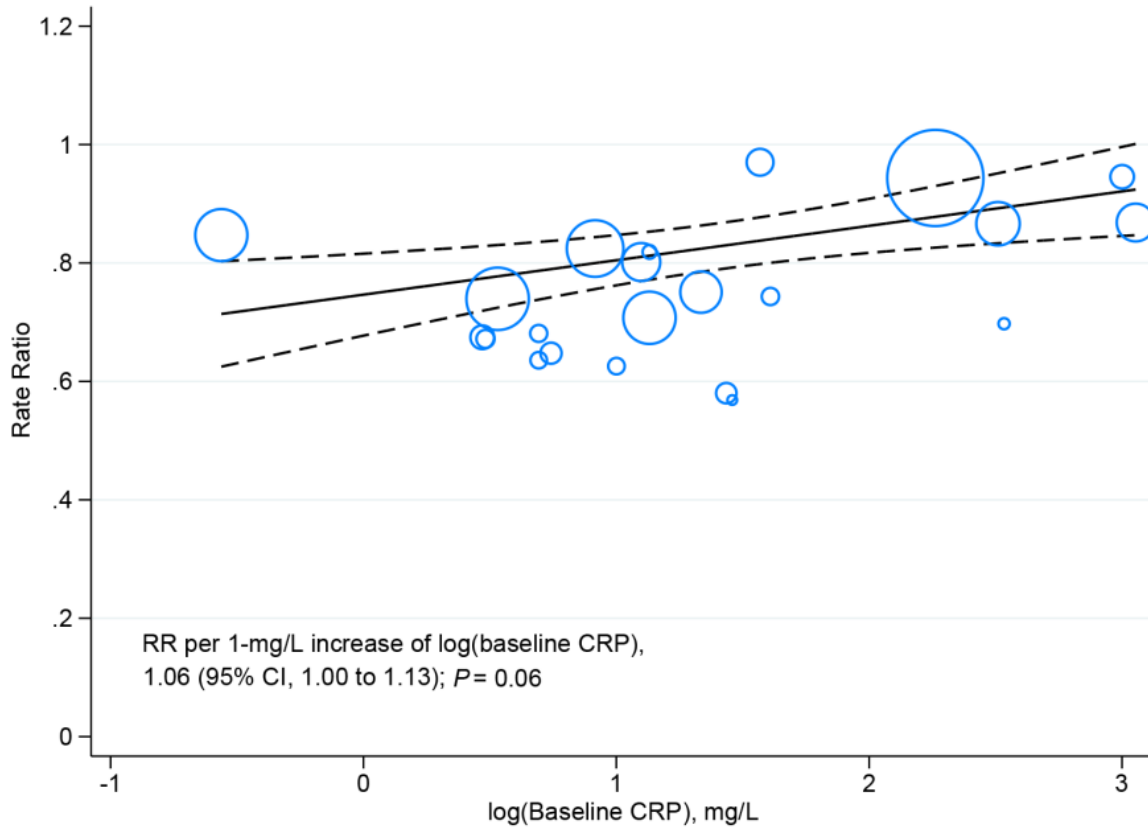

CRP, C-reactive protein; RR, rate ratio.

**Figure S14. Meta-regression Analysis of Coronary Revascularization Rate Ratio Plotted Against Magnitude of Reduction in CRP Concentrations Between More-intensive and Less-Intensive Lipid-Lowering Group.**

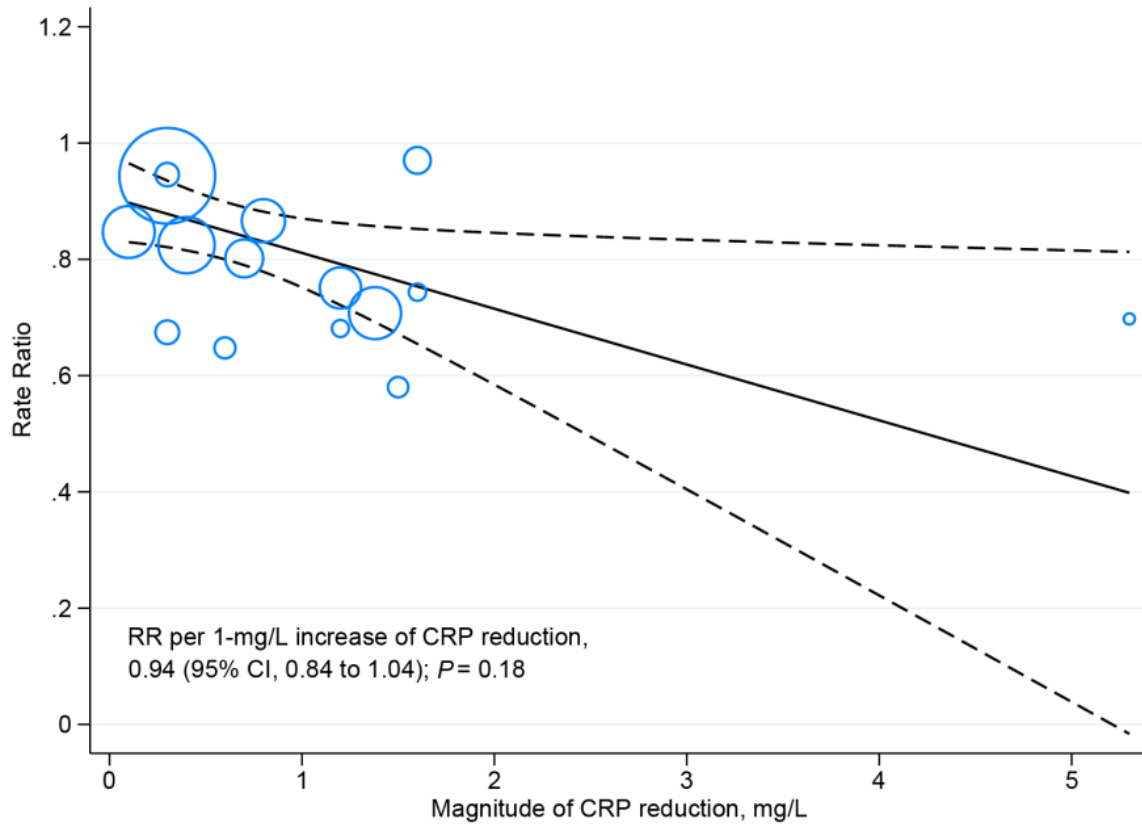

CRP, C-reactive protein; RR, rate ratio.



**Figure S15. Meta-analysis of Coronary Revascularization Stratified by Baseline CRP Concentrations.**

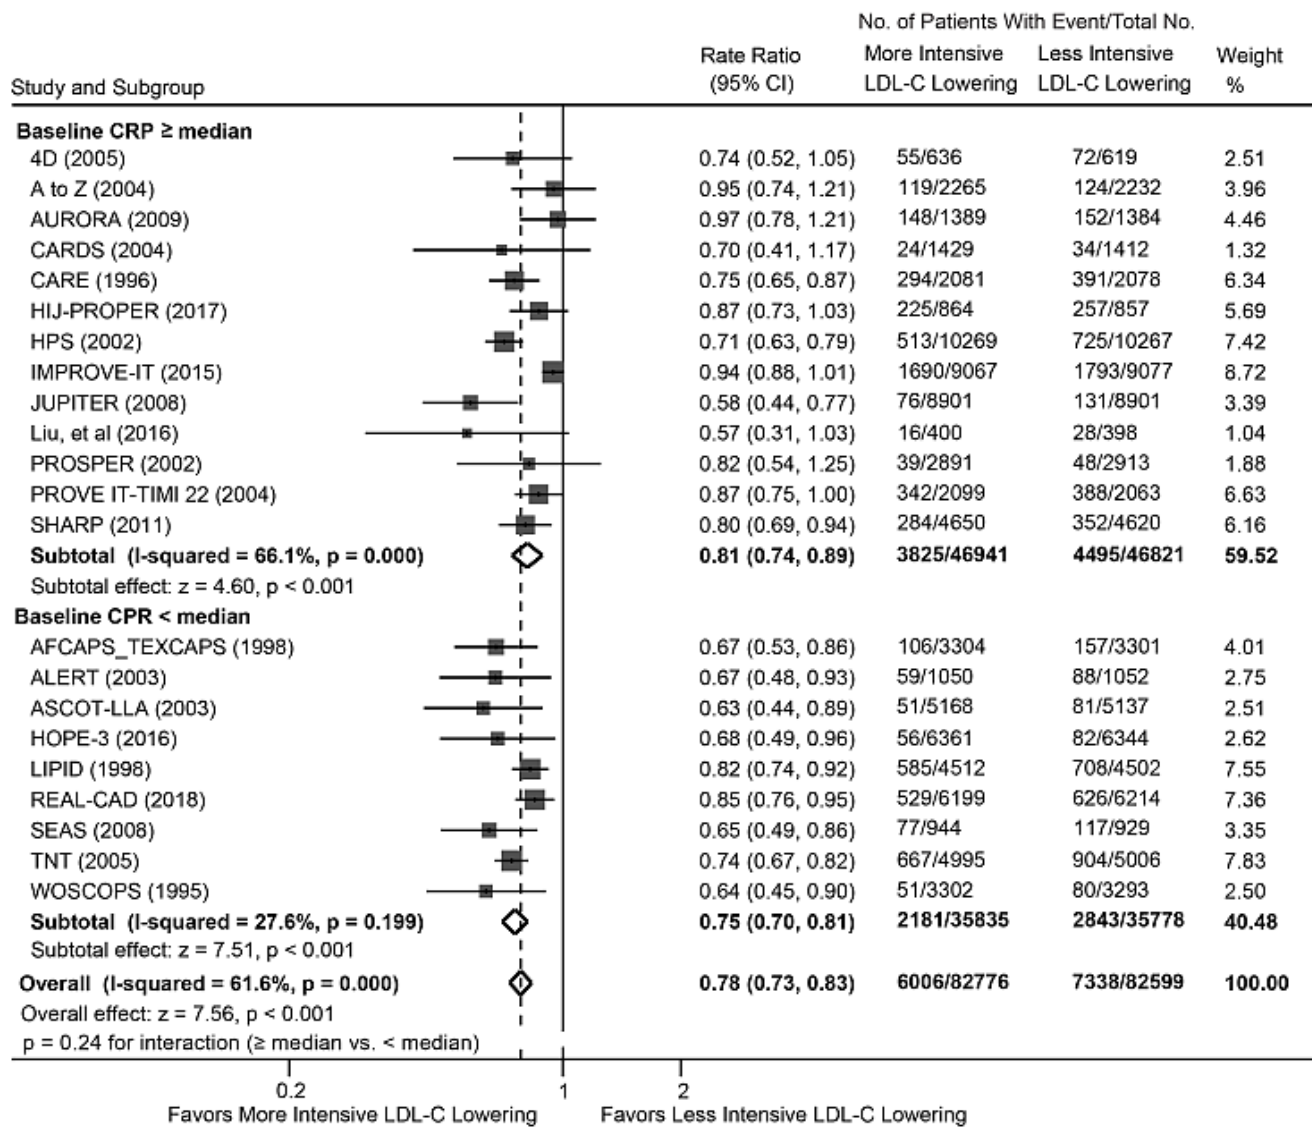

4D, German Diabetes Dialysis Study—Die Deutsche Diabetes Dialyse Studies; A to Z, Aggrastat to Zocor; AFCAPS-TexCAPS, Air Force/Texas Coronary Atherosclerosis Prevention Study; ALERT, Assessment of LEscol in Renal Transplantation Study; ASCOT-LLA, Anglo-Scandinavian Cardiac Outcomes Trial—Lipid Lowering Arm; AURORA, An Assessment of Survival and Cardiovascular Events; CARDS, Collaborative Atorvastatin Diabetes Study; CARE, Cholesterol And Recurrent Events; CORON, the Controlled Rosuvastatin Multinational Trial in Heart Failure; HIJ-PROPER, the Heart Institute of Japan PROper level of lipid lOwering with Pitavastatin and Ezetimibe in acute coRonary syndrome trial; HOPE-3, Heart Outcomes Prevention Evaluation; HPS, Heart Protection Study; IMPROVE-IT, Improved Reduction of Outcomes: Vytorin Efficacy International Trial; JUPITER, Justification for the Use of Statins in Prevention: an Intervention Trial Evaluating Rosuvastatin study group; LIPID, Long-term Intervention with Pravastatin in Ischaemic Disease; PREVEND IT, the Prevention of RENal and Vascular ENdstage Disease Intervention Trial; PROSPER, PROspective Study of Pravastatin in the Elderly at Risk; PROVE IT-TIMI 22, Pravastatin or Atorvastatin Evaluation and Infection Therapy; REAL-CAD, Randomized Evaluation of Aggressive or Moderate Lipid Lowering Therapy With Pitavastatin in Coronary Artery Disease; SEAS, Simvastatin and Ezetimibe in Aortic Stenosis; SHARP, Study of Heart and Renal Protection; TNT, Treating to New Targets; WOSCOPS, West of Scotland Coronary Prevention Study.

**Figure S16. Meta-analysis of Coronary Revascularization Stratified by Magnitude of Reduction in CRP Concentrations Between More-intensive and Less-Intensive Lipid-Lowering Group.**

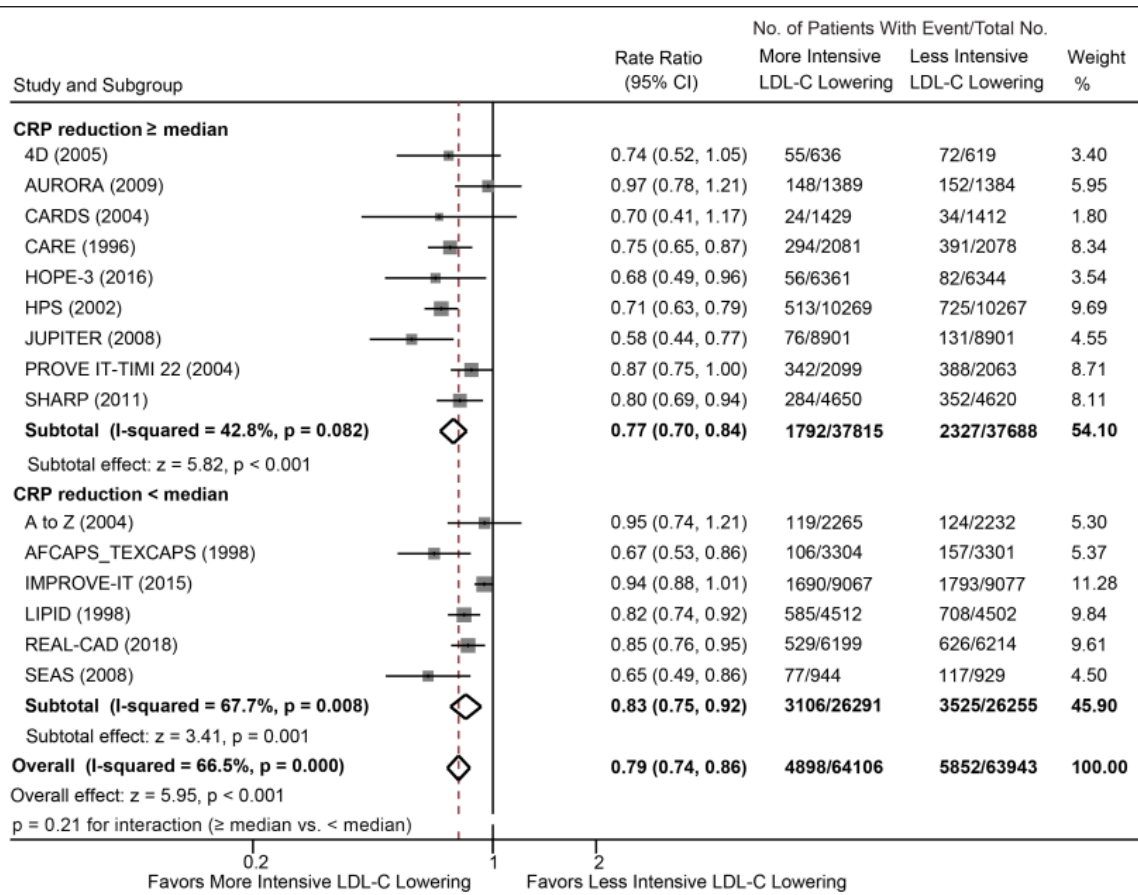

4D, German Diabetes Dialysis Study—Die Deutsche Diabetes Dialyse Studies; A to Z, Aggrastat to Zocor; AFCAPS-TexCAPS, Air Force/Texas Coronary Atherosclerosis Prevention Study; ALERT, Assessment of LEscol in Renal Transplantation Study; ASCOT-LLA, Anglo-Scandinavian Cardiac Outcomes Trial—Lipid Lowering Arm; AURORA, An Assessment of Survival and Cardiovascular Events; CARDS, Collaborative Atorvastatin Diabetes Study; CARE, Cholesterol And Recurrent Events; CORON, the Controlled Rosuvastatin Multinational Trial in Heart Failure; HIJ-PROPER, the Heart Institute of Japan PROper level of lipid lOwering with Pitavastatin and Ezetimibe in acute coRonary syndrome trial; HOPE-3, Heart Outcomes Prevention Evaluation; HPS, Heart Protection Study; IMPROVE-IT, Improved Reduction of Outcomes: Vytorin Efficacy International Trial; JUPITER, Justification for the Use of Statins in Prevention: an Intervention Trial Evaluating Rosuvastatin study group; LIPID, Long-term Intervention with Pravastatin in Ischaemic Disease; PREVENT IT, the Prevention of RENal and Vascular ENdstage Disease Intervention Trial; PROSPER, PROspective Study of Pravastatin in the Elderly at Risk; PROVE IT-TIMI 22, Pravastatin or Atorvastatin Evaluation and Infection Therapy; REAL-CAD, Randomized Evaluation of Aggressive or Moderate Lipid Lowering Therapy With Pitavastatin in Coronary Artery Disease; SEAS, Simvastatin and Ezetimibe in Aortic Stenosis; SHARP, Study of Heart and Renal Protection; TNT, Treating to New Targets; WOSCOPS, West of Scotland Coronary Prevention Study.

**Figure S17. Meta-regression Analysis of MACE Rate Ratio Plotted Against log(baseline CRP Concentrations) in the More Intensive Group.**

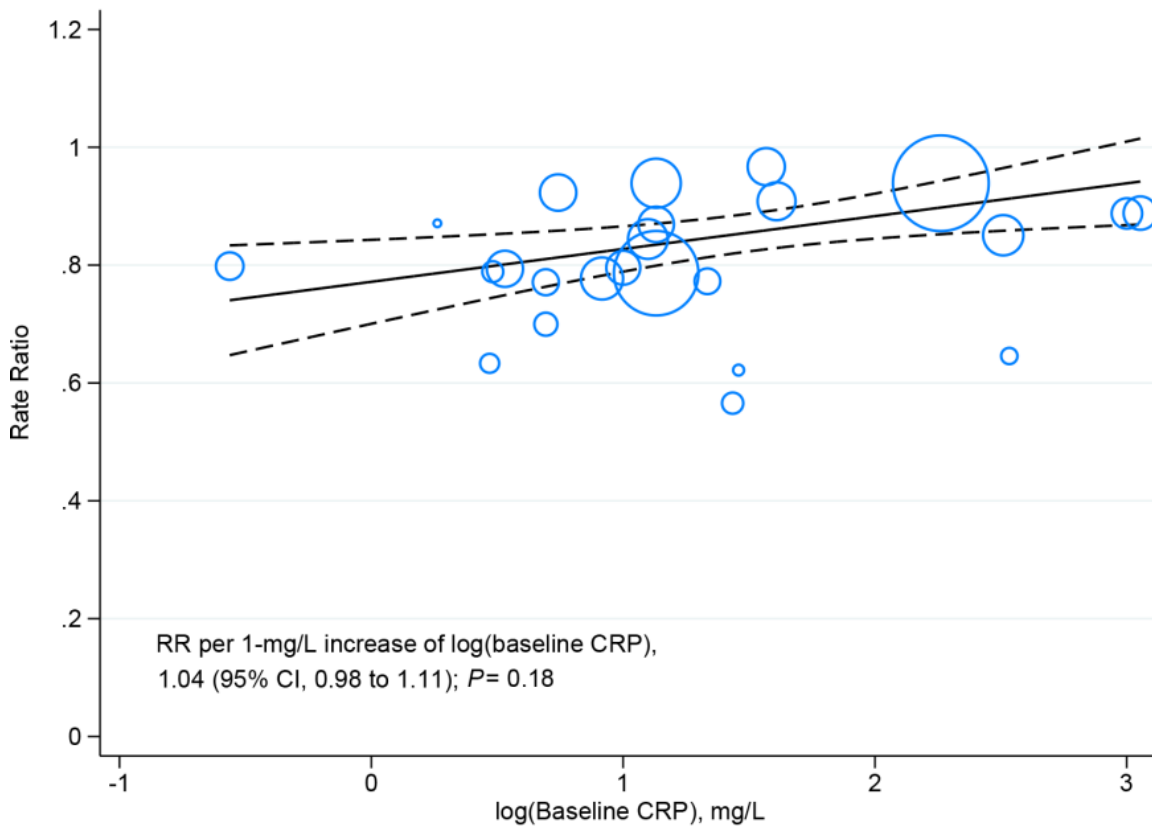

CRP, C-reactive protein; RR, rate ratio.

**Figure S18. Meta-regression Analysis of MACE Rate Ratio Plotted Against Magnitude of Reduction in CRP Concentrations Between More-intensive and Less-Intensive Lipid-Lowering Group.**

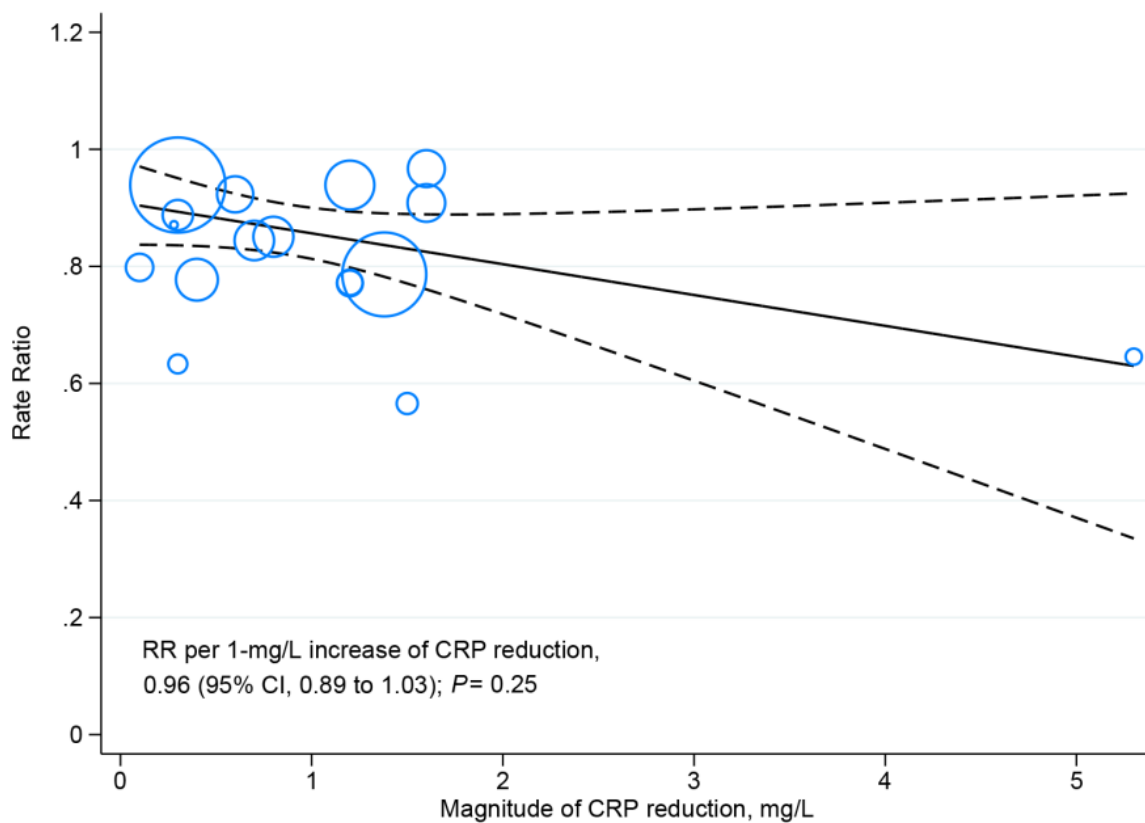

CRP, C-reactive protein; RR, rate ratio.

**Figure S19. Meta-analysis of MACE Stratified by Baseline CRP Concentrations.**

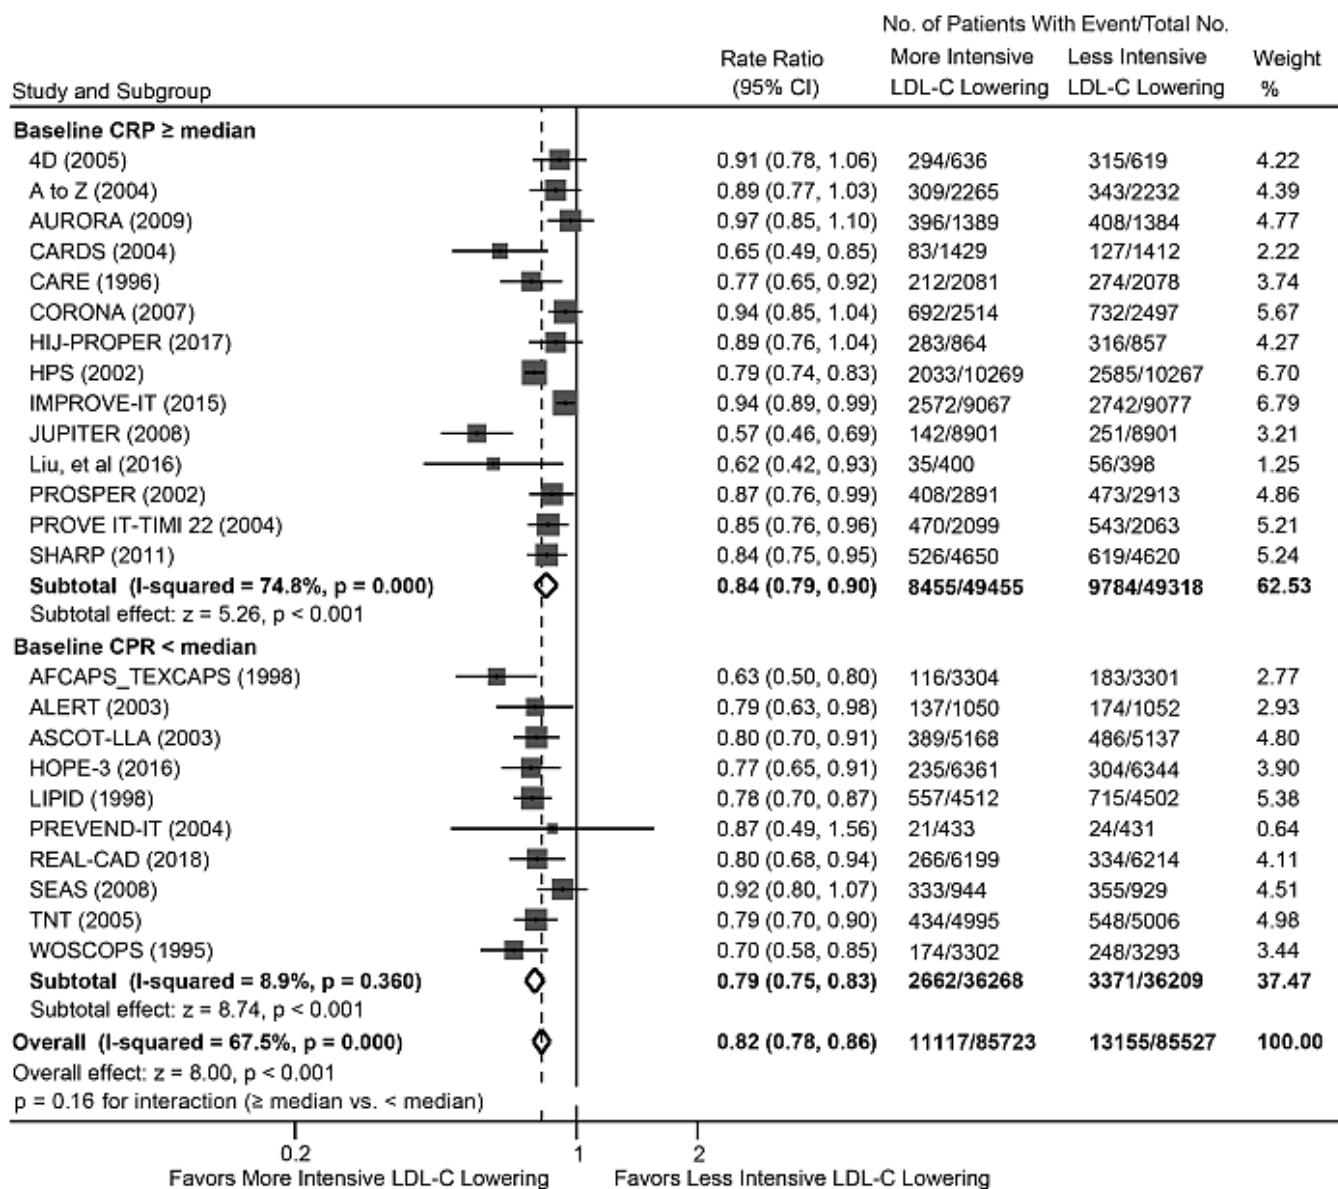

4D, German Diabetes Dialysis Study—Die Deutsche Diabetes Dialyse Studies; A to Z, Aggrastat to Zocor; AFCAPS-TexCAPS, Air Force/Texas Coronary Atherosclerosis Prevention Study; ALERT, Assessment of LEscol in Renal Transplantation Study; ASCOT-LLA, Anglo-Scandinavian Cardiac Outcomes Trial—Lipid Lowering Arm; AURORA, An Assessment of Survival and Cardiovascular Events; CARDS, Collaborative Atorvastatin Diabetes Study; CARE, Cholesterol And Recurrent Events; CORON, the Controlled Rosuvastatin Multinational Trial in Heart Failure; HIJ-PROPER, the Heart Institute of Japan PROper level of lipid lOwering with Pitavastatin and Ezetimibe in acute coRONary syndrome trial; HOPE-3, Heart Outcomes Prevention Evaluation; HPS, Heart Protection Study; IMPROVE-IT, Improved Reduction of Outcomes: Vytorin Efficacy International Trial; JUPITER, Justification for the Use of Statins in Prevention: an Intervention Trial Evaluating Rosuvastatin study group; LIPID, Long-term Intervention with Pravastatin in Ischaemic Disease; PREVEND IT, the Prevention of RENal and Vascular ENdstage Disease Intervention Trial; PROSPER, PROspective Study of Pravastatin in the Elderly at Risk; PROVE IT-TIMI 22, Pravastatin or Atorvastatin Evaluation and Infection Therapy; REAL-CAD, Randomized Evaluation of Aggressive or Moderate Lipid Lowering Therapy With Pitavastatin in Coronary Artery Disease; SEAS, Simvastatin and Ezetimibe in Aortic Stenosis; SHARP, Study of Heart and Renal Protection; TNT, Treating to New Targets; WOSCOPS, West of Scotland Coronary Prevention Study.

**Figure S20. Meta-analysis of MACE Stratified by Magnitude of Reduction in CRP Concentrations Between More-intensive and Less-Intensive Lipid-Lowering Group.**

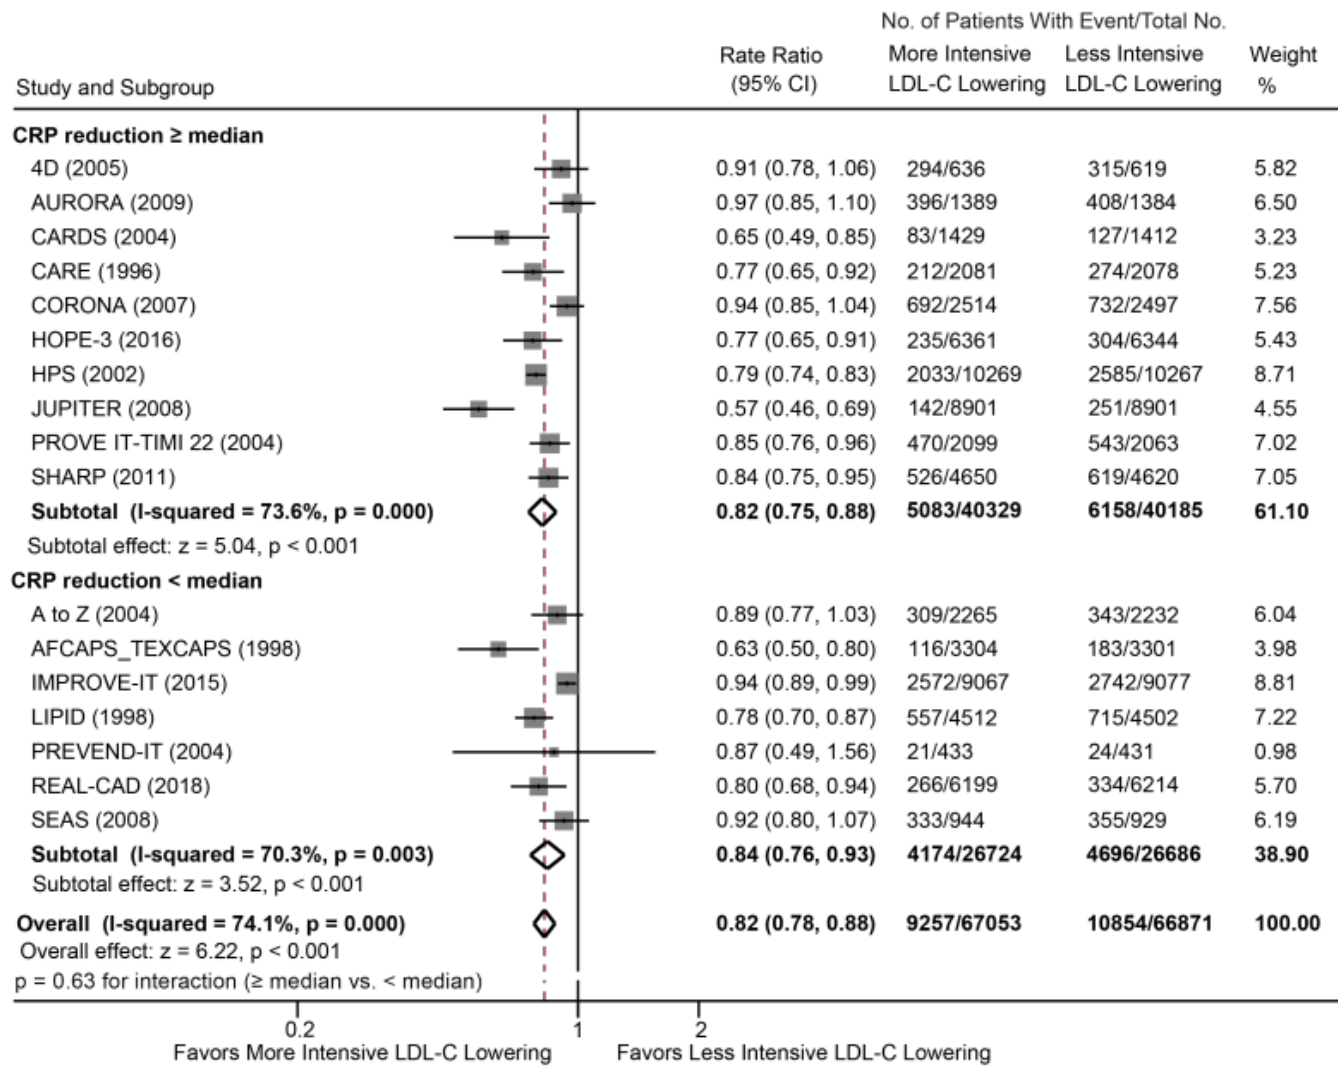

4D, German Diabetes Dialysis Study—Die Deutsche Diabetes Dialyse Studies; A to Z, Aggrastat to Zocor; AFCAPS-TexCAPS, Air Force/Texas Coronary Atherosclerosis Prevention Study; ALERT, Assessment of LEscol in Renal Transplantation Study; ASCOT-LLA, Anglo-Scandinavian Cardiac Outcomes Trial—Lipid Lowering Arm; AURORA, An Assessment of Survival and Cardiovascular Events; CARDS, Collaborative Atorvastatin Diabetes Study; CARE, Cholesterol And Recurrent Events; CORON, the Controlled Rosuvastatin Multinational Trial in Heart Failure; HIJ-PROPER, the Heart Institute of Japan PROper level of lipid lOwering with Pitavastatin and Ezetimibe in acute coRonary syndrome trial; HOPE-3, Heart Outcomes Prevention Evaluation; HPS, Heart Protection Study; IMPROVE-IT, Improved Reduction of Outcomes: Vytorin Efficacy International Trial; JUPITER, Justification for the Use of Statins in Prevention: an Intervention Trial Evaluating Rosuvastatin study group; LIPID, Long-term Intervention with Pravastatin in Ischaemic Disease; PREVEND IT, the Prevention of RENal and Vascular ENdstage Disease Intervention Trial; PROSPER, PROspective Study of Pravastatin in the Elderly at Risk; PROVE IT-TIMI 22, Pravastatin or Atorvastatin Evaluation and Infection Therapy; REAL-CAD, Randomized Evaluation of Aggressive or Moderate Lipid Lowering Therapy With Pitavastatin in Coronary Artery Disease; SEAS, Simvastatin and Ezetimibe in Aortic Stenosis; SHARP, Study of Heart and Renal Protection; TNT, Treating to New Targets; WOSCOPS, West of Scotland Coronary Prevention Study.

**Figure S21. Meta-regression Analysis of Myocardial Infarction Rate Ratio Plotted Against log(baseline CRP Concentrations) in the Secondary Prevention Trials.**

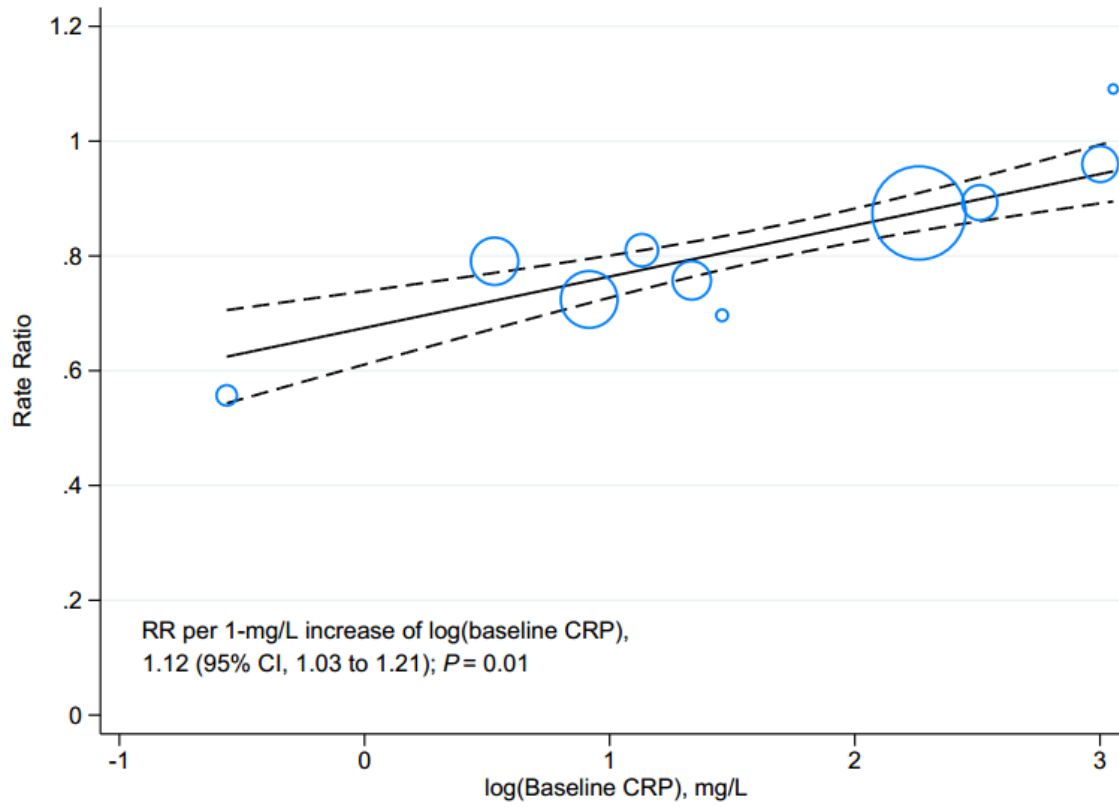

CRP, C-reactive protein; RR, rate ratio.



**Figure S22. Meta-analysis of All-Cause Mortality Stratified by the Achieved CRP Concentrations.**

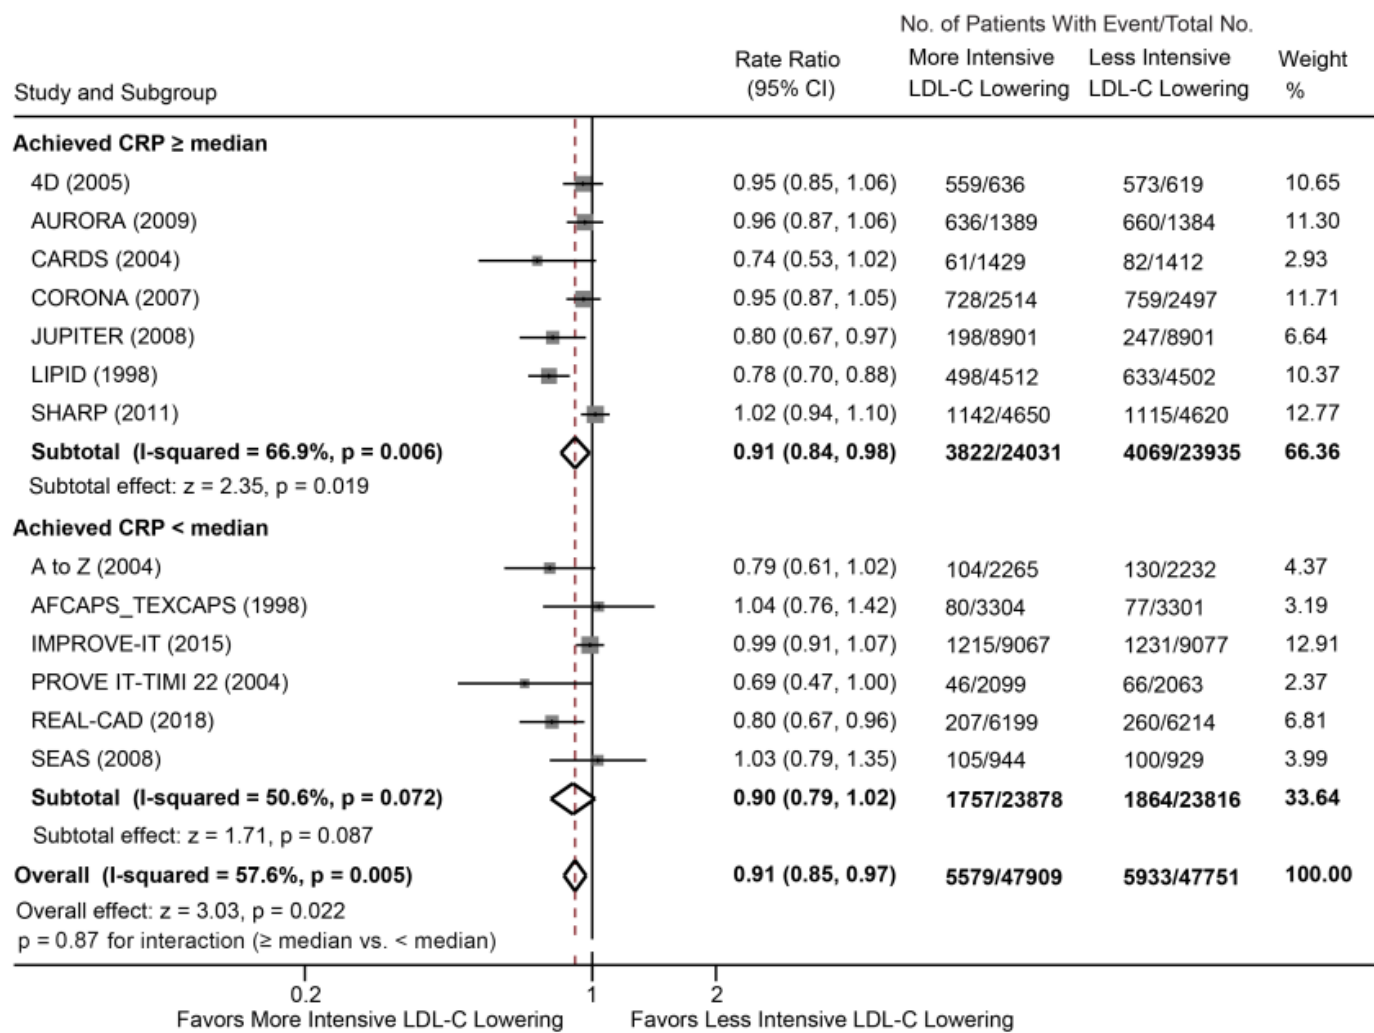

4D, German Diabetes Dialysis Study—Die Deutsche Diabetes Dialyse Studies; A to Z, Aggrastat to Zocor; AFCAPS-TexCAPS, Air Force/Texas Coronary Atherosclerosis Prevention Study; AURORA, An Assessment of Survival and Cardiovascular Events; CARDS, Collaborative Atorvastatin Diabetes Study; CARE, Cholesterol And Recurrent Events; CORON, the Controlled Rosuvastatin Multinational Trial in Heart Failure; JUPITER, Justification for the Use of Statins in Prevention: an Intervention Trial Evaluating Rosuvastatin study group; LIPID, Long-term Intervention with Pravastatin in Ischaemic Disease; PROVE IT-TIMI 22, Pravastatin or Atorvastatin Evaluation and Infection Therapy; REAL-CAD, Randomized Evaluation of Aggressive or Moderate Lipid Lowering Therapy With Pitavastatin in Coronary Artery Disease; SEAS, Simvastatin and Ezetimibe in Aortic Stenosis; SHARP, Study of Heart and Renal Protection.



**Figure S23. Meta-analysis of Cardiovascular Mortality Stratified by the Achieved CRP Concentrations.**

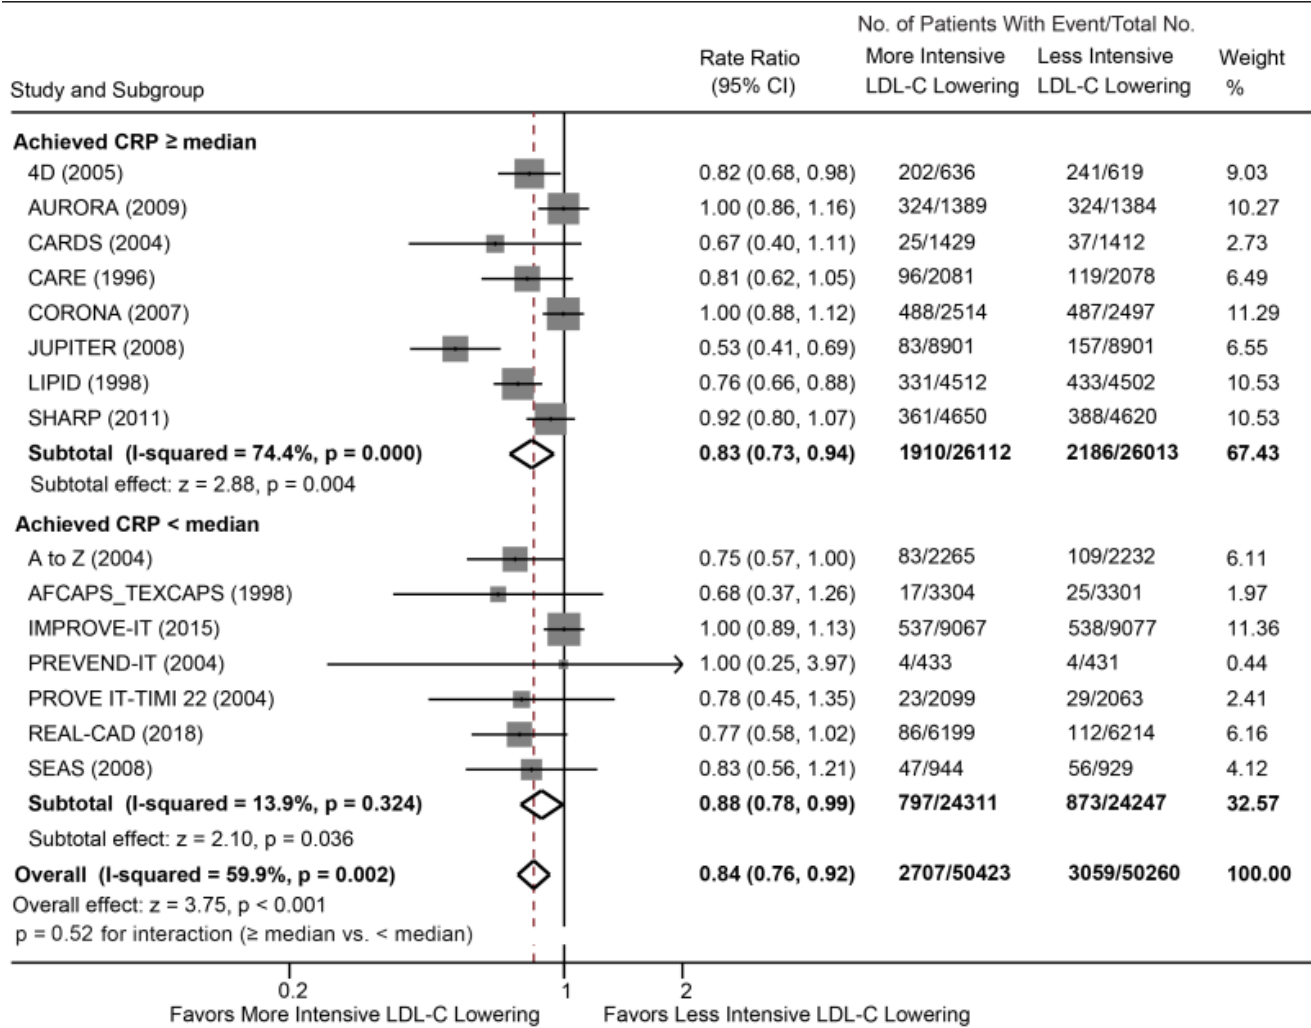

4D, German Diabetes Dialysis Study—Die Deutsche Diabetes Dialyse Studies; A to Z, Aggrastat to Zocor; AFCAPS-TexCAPS, Air Force/Texas Coronary Atherosclerosis Prevention Study; AURORA, An Assessment of Survival and Cardiovascular Events; CARDS, Collaborative Atorvastatin Diabetes Study; CARE, Cholesterol And Recurrent Events; CORON, the Controlled Rosuvastatin Multinational Trial in Heart Failure; JUPITER, Justification for the Use of Statins in Prevention: an Intervention Trial Evaluating Rosuvastatin study group; LIPID, Long-term Intervention with Pravastatin in Ischaemic Disease; PROVE IT-TIMI 22, Pravastatin or Atorvastatin Evaluation and Infection Therapy; REAL-CAD, Randomized Evaluation of Aggressive or Moderate Lipid Lowering Therapy With Pitavastatin in Coronary Artery Disease; SEAS, Simvastatin and Ezetimibe in Aortic Stenosis; SHARP, Study of Heart and Renal Protection.

**Figure S24. Meta-analysis of Myocardial Infarction Stratified by the Achieved CRP Concentrations.**

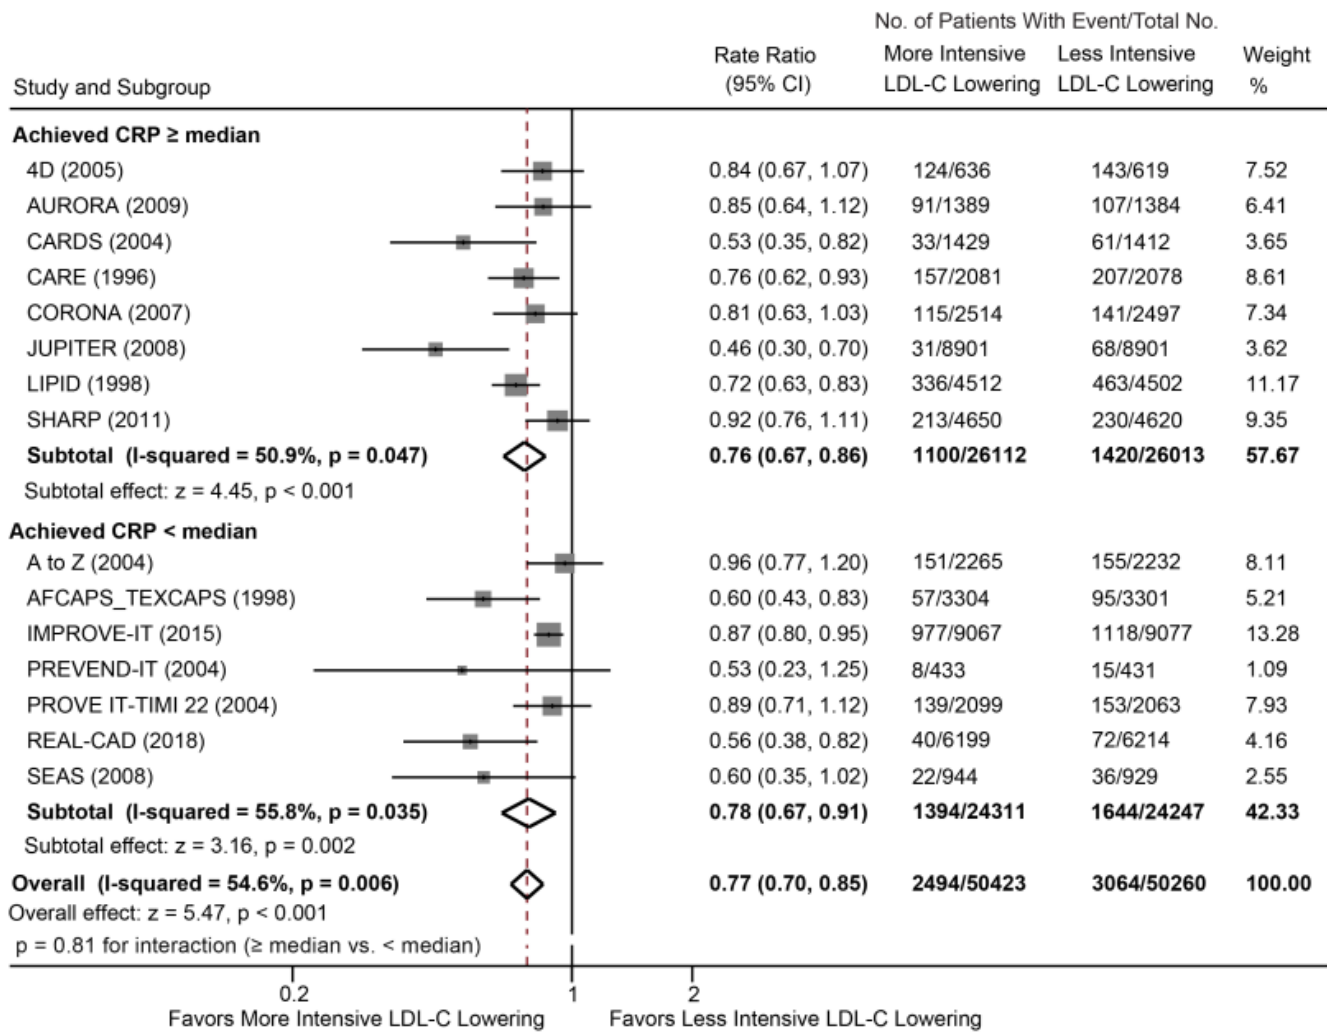

4D, German Diabetes Dialysis Study—Die Deutsche Diabetes Dialyse Studies; A to Z, Aggrastat to Zocor; AFCAPS-TexCAPS, Air Force/Texas Coronary Atherosclerosis Prevention Study; AURORA, An Assessment of Survival and Cardiovascular Events; CARDS, Collaborative Atorvastatin Diabetes Study; CARE, Cholesterol And Recurrent Events; CORON, the Controlled Rosuvastatin Multinational Trial in Heart Failure; JUPITER, Justification for the Use of Statins in Prevention: an Intervention Trial Evaluating Rosuvastatin study group; LIPID, Long-term Intervention with Pravastatin in Ischaemic Disease; PROVE IT-TIMI 22, Pravastatin or Atorvastatin Evaluation and Infection Therapy; REAL-CAD, Randomized Evaluation of Aggressive or Moderate Lipid Lowering Therapy With Pitavastatin in Coronary Artery Disease; SEAS, Simvastatin and Ezetimibe in Aortic Stenosis; SHARP, Study of Heart and Renal Protection.

**Figure S25. Meta-analysis of Stroke Stratified by the Achieved CRP Concentrations.**

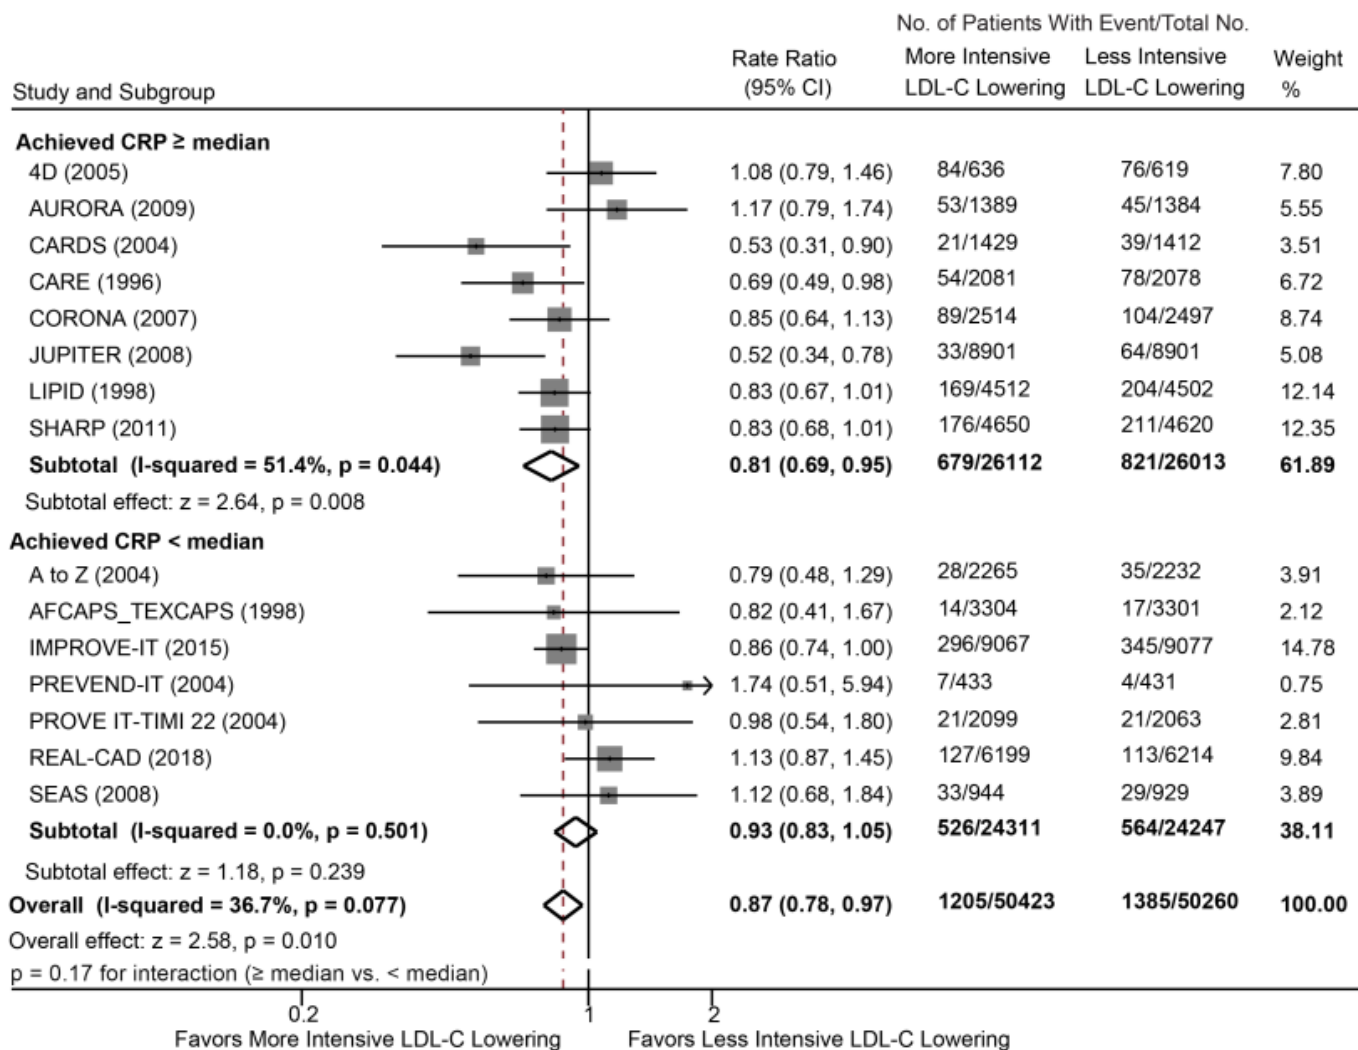

4D, German Diabetes Dialysis Study—Die Deutsche Diabetes Dialyse Studies; A to Z, Aggrastat to Zocor; AFCAPS-TexCAPS, Air Force/Texas Coronary Atherosclerosis Prevention Study; AURORA, An Assessment of Survival and Cardiovascular Events; CARDS, Collaborative Atorvastatin Diabetes Study; CARE, Cholesterol And Recurrent Events; CORON, the Controlled Rosuvastatin Multinational Trial in Heart Failure; JUPITER, Justification for the Use of Statins in Prevention: an Intervention Trial Evaluating Rosuvastatin study group; LIPID, Long-term Intervention with Pravastatin in Ischaemic Disease; PROVE IT-TIMI 22, Pravastatin or Atorvastatin Evaluation and Infection Therapy; REAL-CAD, Randomized Evaluation of Aggressive or Moderate Lipid Lowering Therapy With Pitavastatin in Coronary Artery Disease; SEAS, Simvastatin and Ezetimibe in Aortic Stenosis; SHARP, Study of Heart and Renal Protection.

**Figure S26. Meta-analysis of Coronary Revascularization Stratified by the Achieved CRP Concentrations.**

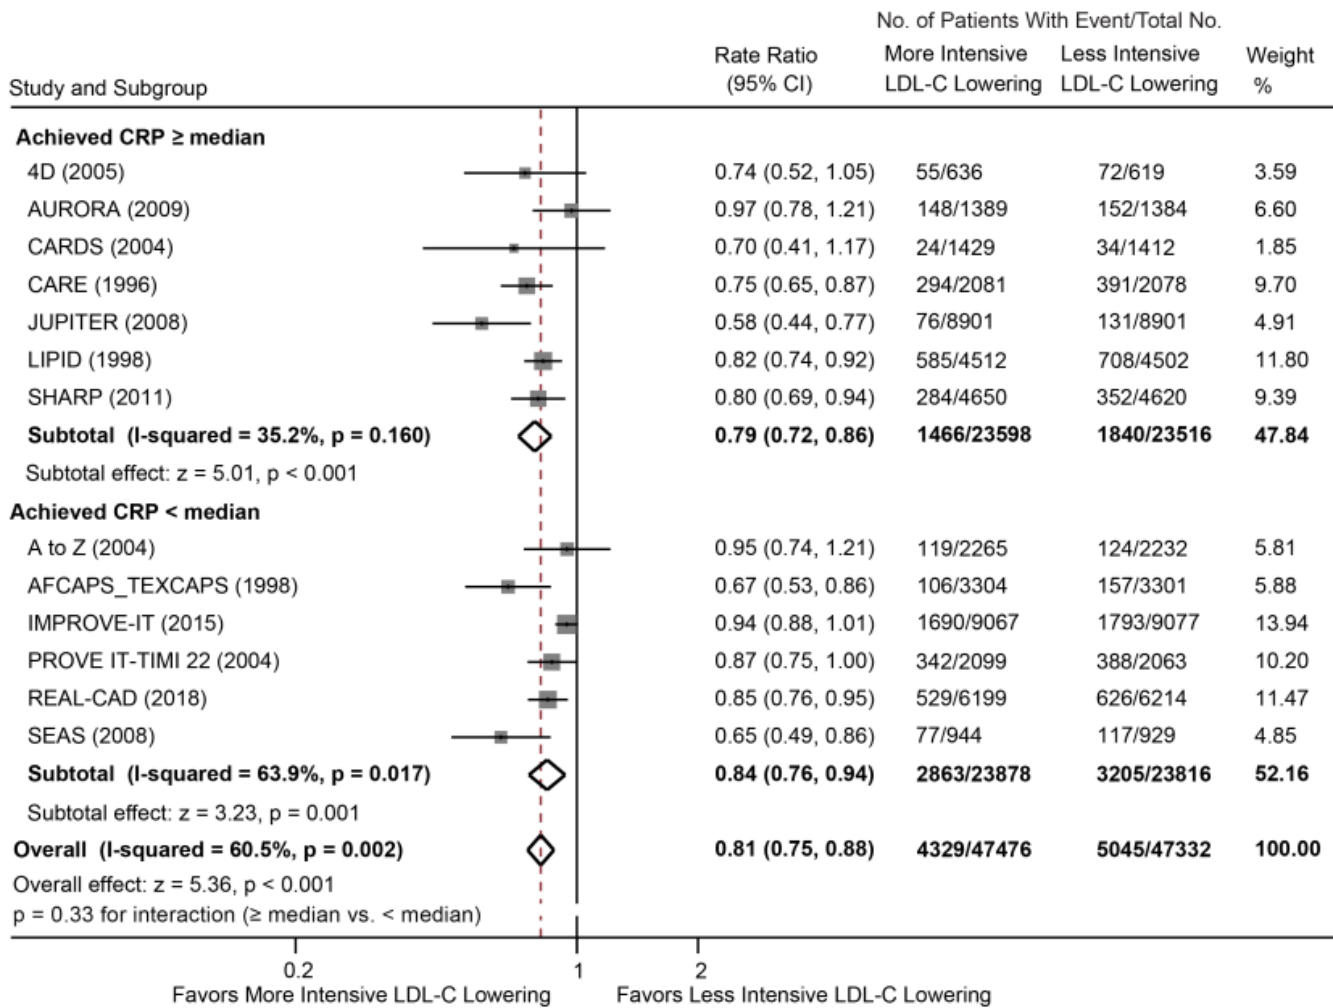

4D, German Diabetes Dialysis Study—Die Deutsche Diabetes Dialyse Studies; A to Z, Aggrastat to Zocor; AFCAPS-TexCAPS, Air Force/Texas Coronary Atherosclerosis Prevention Study; AURORA, An Assessment of Survival and Cardiovascular Events; CARDS, Collaborative Atorvastatin Diabetes Study; CARE, Cholesterol And Recurrent Events; CORON, the Controlled Rosuvastatin Multinational Trial in Heart Failure; JUPITER, Justification for the Use of Statins in Prevention: an Intervention Trial Evaluating Rosuvastatin study group; LIPID, Long-term Intervention with Pravastatin in Ischaemic Disease; PROVE IT-TIMI 22, Pravastatin or Atorvastatin Evaluation and Infection Therapy; REAL-CAD, Randomized Evaluation of Aggressive or Moderate Lipid Lowering Therapy With Pitavastatin in Coronary Artery Disease; SEAS, Simvastatin and Ezetimibe in Aortic Stenosis; SHARP, Study of Heart and Renal Protection.

**Figure S27. Meta-analysis of MACE Stratified by the Achieved CRP Concentrations.**

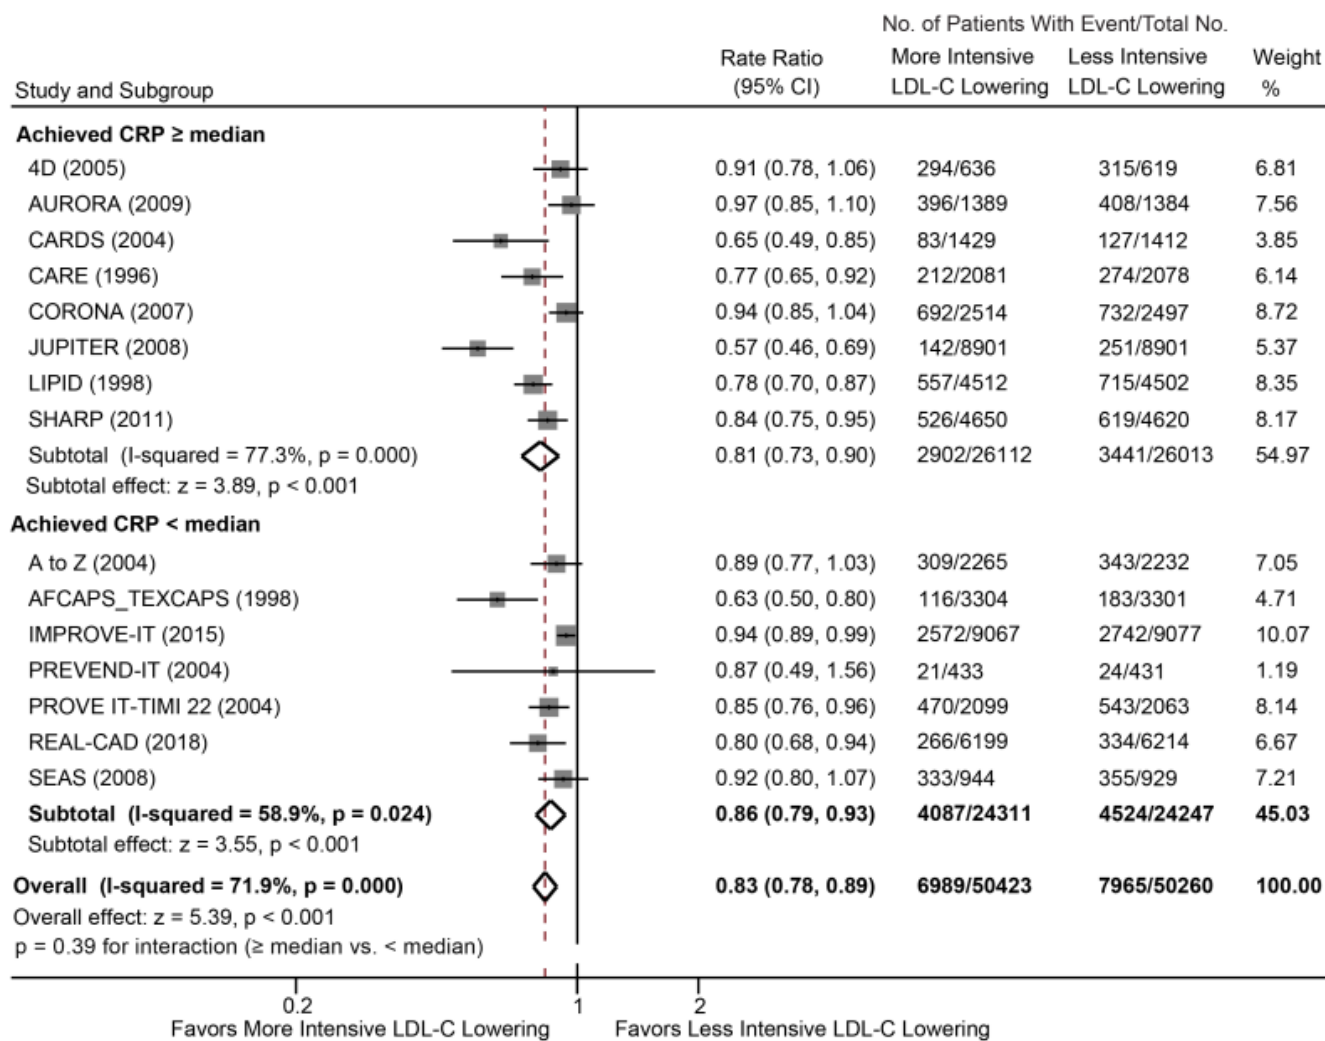

4D, German Diabetes Dialysis Study—Die Deutsche Diabetes Dialyse Studies; A to Z, Aggrastat to Zocor; AFCAPS-TexCAPS, Air Force/Texas Coronary Atherosclerosis Prevention Study; AURORA, An Assessment of Survival and Cardiovascular Events; CARDS, Collaborative Atorvastatin Diabetes Study; CARE, Cholesterol And Recurrent Events; CORON, the Controlled Rosuvastatin Multinational Trial in Heart Failure; JUPITER, Justification for the Use of Statins in Prevention: an Intervention Trial Evaluating Rosuvastatin study group; LIPID, Long-term Intervention with Pravastatin in Ischaemic Disease; PROVE IT-TIMI 22, Pravastatin or Atorvastatin Evaluation and Infection Therapy; REAL-CAD, Randomized Evaluation of Aggressive or Moderate Lipid Lowering Therapy With Pitavastatin in Coronary Artery Disease; SEAS, Simvastatin and Ezetimibe in Aortic Stenosis; SHARP, Study of Heart and Renal Protection.
